# Supplementary material for: Association between serum uric acid and obesity in Chinese adults: a 9-year longitudinal data analysis
Source: PubMed Central journal article supplement — BMJ Open. 2021 Feb 5;11(2):e041919. doi: 10.1136/bmjopen-2020-041919 (PMC7908911; doi:10.1136/bmjopen-2020-041919), 2021-02-05
Supplement: bmjopen-2020-041919.draft_revisions.pdf [file bmjopen-2020-041919.draft_revisions.pdf]

# BMJ Open

BMJ Open is committed to open peer review. As part of this commitment we make the peer review history of every article we publish publicly available.

When an article is published we post the peer reviewers' comments and the authors' responses online. We also post the versions of the paper that were used during peer review. These are the versions that the peer review comments apply to.

The versions of the paper that follow are the versions that were submitted during the peer review process. They are not the versions of record or the final published versions. They should not be cited or distributed as the published version of this manuscript.

BMJ Open is an open access journal and the full, final, typeset and author-corrected version of record of the manuscript is available on our site with no access controls, subscription charges or pay-per-view fees (<http://bmjopen.bmj.com>).

If you have any questions on BMJ Open's open peer review process please email [info.bmjopen@bmj.com](mailto:info.bmjopen@bmj.com)

# BMJ Open

## Association between serum uric acid and obesity in Chinese adults: A nine-year longitudinal data analysis

|                               |                                                                                                                                                                                                                                                                          |
|-------------------------------|--------------------------------------------------------------------------------------------------------------------------------------------------------------------------------------------------------------------------------------------------------------------------|
| Journal:                      | <i>BMJ Open</i>                                                                                                                                                                                                                                                          |
| Manuscript ID                 | bmjopen-2020-041919                                                                                                                                                                                                                                                      |
| Article Type:                 | Original research                                                                                                                                                                                                                                                        |
| Date Submitted by the Author: | 23-Jun-2020                                                                                                                                                                                                                                                              |
| Complete List of Authors:     | Zeng, Jie; Guangdong Second Provincial General Hospital, Center for Clinical Epidemiology and Methodology<br>Lawrence, Wayne R<br>Yang, Jun<br>Tian, Junzhang<br>Li, Guanming<br>Lian, Wanmin<br>He, Jingjun<br>Qu, Hongying<br>Wang, Xiaojie<br>Li, Cheng<br>Li, Guowei |
| Keywords:                     | Public health < INFECTIOUS DISEASES, Risk management < HEALTH SERVICES ADMINISTRATION & MANAGEMENT, Epidemiology < TROPICAL MEDICINE                                                                                                                                     |
|                               |                                                                                                                                                                                                                                                                          |

SCHOLARONE™  
Manuscripts

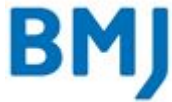

I, the Submitting Author has the right to grant and does grant on behalf of all authors of the Work (as defined in the below author licence), an exclusive licence and/or a non-exclusive licence for contributions from authors who are: i) UK Crown employees; ii) where BMJ has agreed a CC-BY licence shall apply, and/or iii) in accordance with the terms applicable for US Federal Government officers or employees acting as part of their official duties; on a worldwide, perpetual, irrevocable, royalty-free basis to BMJ Publishing Group Ltd ("BMJ") its licensees and where the relevant Journal is co-owned by BMJ to the co-owners of the Journal, to publish the Work in this journal and any other BMJ products and to exploit all rights, as set out in our [licence](#).

The Submitting Author accepts and understands that any supply made under these terms is made by BMJ to the Submitting Author unless you are acting as an employee on behalf of your employer or a postgraduate student of an affiliated institution which is paying any applicable article publishing charge ("APC") for Open Access articles. Where the Submitting Author wishes to make the Work available on an Open Access basis (and intends to pay the relevant APC), the terms of reuse of such Open Access shall be governed by a Creative Commons licence – details of these licences and which [Creative Commons](#) licence will apply to this Work are set out in our licence referred to above.

Other than as permitted in any relevant BMJ Author's Self Archiving Policies, I confirm this Work has not been accepted for publication elsewhere, is not being considered for publication elsewhere and does not duplicate material already published. I confirm all authors consent to publication of this Work and authorise the granting of this licence.

# Association between serum uric acid and obesity in Chinese adults: A nine-year longitudinal data analysis

Jie Zeng<sup>1</sup>, Wayne R. Lawrence<sup>2</sup>, Jun Yang<sup>3</sup>, Junzhang Tian<sup>1</sup>, Guanming Li<sup>1</sup>, Wanmin Lian<sup>4</sup>,  
Jingjun He<sup>5</sup>, Hongying Qu<sup>1,5</sup>, Xiaojie Wang<sup>1</sup>, Cheng Li<sup>6\*</sup>, and Guowei Li<sup>1,7\*</sup>

<sup>1</sup> Center for Clinical Epidemiology and Methodology (CCEM), Guangdong Second Provincial General Hospital, Guangzhou, China.

<sup>2</sup> Department of Epidemiology and Biostatistics, School of Public Health, University at Albany, State University of New York, One University Place, Rensselaer, New York.

<sup>3</sup> Institute for Environmental and Climate Research, Jinan University, Guangzhou, 511443, China.

<sup>4</sup> Center for Information, Guangdong Second Provincial General Hospital, Guangzhou, China.

<sup>5</sup> Center for Health Management and Examination, Guangdong Second Provincial General Hospital, Guangzhou, China.

<sup>6</sup> Guangdong Traditional Medical and Sports Injury Rehabilitation Research Institute, Guangdong Second Provincial General Hospital, Guangzhou, China.

<sup>7</sup> Department of Health Research Methods, Evidence, and Impact (HEI), McMaster University, Hamilton, ON, Canada.

## \*Corresponding Authors:

### **Guowei Li, PhD**

CCEM, Guangdong Second Provincial General Hospital, Guangzhou 510317, China.

Department of HEI, McMaster University, Hamilton, Canada L8S 4L8

Telephone: 86-020-89169025; Fax: 86-020-89168021

E-mail: liguowei099@126.com

and

### **Cheng Li, MD**

Guangdong Traditional Medical and Sports Injury Rehabilitation Research Institute, Guangdong Second Provincial General Hospital, Guangzhou, 510317, China.

Telephone: 86-020-32640264; Fax: 86-020-32640184

E-mail: lywergd@163.com

Word count: 2,822

## 1 Abstract

2 **Objectives:** Hyperuricemia has been reported to be significantly associated with risk of obesity.  
3 However, previous studies on the association between serum uric acid (SUA) and body mass  
4 index (BMI) yielded conflicting results. The present study examined the relationship between  
5 SUA and obesity among Chinese adults.

6  
7 **Methods:** Data were collected at Guangdong Second Provincial General Hospital in Guangzhou  
8 City, China between January 2010 and December 2018. Participants with medical checkup  $\geq 2$   
9 times were included in our analyses. Physical examinations and laboratory measurement variables  
10 were obtained from the medical checkup system. The high SUA level group was classified as  
11 participants with hyperuricemia, and obesity was defined as  $BMI \geq 28 \text{ kg/m}^2$ . Logistic regression  
12 model (LRM) was performed for data at baseline. For all participants, generalized estimation  
13 equation (GEE) model was used to assess the association between SUA and obesity, where the  
14 data were repeatedly measured over the nine-year study period. Subgroup analysis was performed  
15 by gender and age group. We calculated the cut-off values for SUA of obesity using the receiver  
16 operating characteristic curves (ROC) technique.

17  
18 **Results:** A total of 15,959 participants (10,023 males and 5,936 females) were included in this  
19 study, with an average age of 37.38 years (SD: 13.27) and average SUA of 367.05  $\mu\text{mol/L}$  (SD:  
20 97.97) at baseline, respectively. The prevalence of obesity was approximately 14.2% for high  
21 SUA level. In logistic regression analysis at baseline, we observed a positive association between  
22 SUA and risk of obesity:  $OR=1.84$  (95% CI: 1.77,1.90) for per-SD increase in SUA. Considering  
23 repeatedly measured over 9-year for all participants in GEE model, the per-SD OR was 1.85 (95%  
24 CI:1.77,1.91) for SUA and the increased risk of obesity was greater for male ( $OR=1.45$ ) and  
25 elderly participants ( $OR=1.01$ ). In subgroup analyses by gender and age, we observed significant  
26 associations between SUA and obesity with higher risk in female ( $OR=2.35$ ) and young  
27 participants ( $OR=1.87$ ) when compared to male ( $OR=1.70$ ) and the elderly participants

1  
2  
3  
4 28 (OR=1.48). The SUA cut off points for risk of obesity using ROC curves were approximately  
5  
6 29 consistent with the international standard.  
7  
8  
9 30

10  
11 31 **Conclusions:** Our study found higher SUA level was associated with increased risk of obesity.  
12  
13 32 More high-quality research is needed to further support this finding.  
14  
15 33

16  
17  
18 34 **Keywords:** serum uric acid, obesity, generalized estimation equation model, risk factors, China  
19  
20 35  
21  
22  
23 36  
24  
25  
26 37  
27  
28  
29 38  
30  
31 39  
32  
33 40  
34  
35  
36 41  
37  
38  
39 42  
40  
41 43  
42  
43  
44 44  
45  
46  
47 45  
48  
49  
50 46  
51  
52  
53 47  
54  
55 48  
56  
57  
58 49  
59  
60

1  
2  
3  
4 50 **Strengths and limitations of this study**  
5

6 51 ➤ This is the first large long-term medical checkup study to explore the relationship between  
7  
8 52 SUA and obesity in China.  
9

10 53 ➤ The study analysis was based on the GEE model which can increase the accuracy of the  
11  
12 54 prediction.  
13

14  
15 55 ➤ The results from this study could inform prevention methods for obesity, especially in  
16  
17 56 medically underserved areas where medical service is insufficient.  
18

19  
20 57 ➤ The younger screening population in this study may underestimate the increased risk of uric  
21  
22 58 acid among the elderly obese.  
23

24  
25 59  
26

27  
28 60  
29  
30  
31  
32  
33  
34  
35  
36  
37  
38  
39  
40  
41  
42  
43  
44  
45  
46  
47  
48  
49  
50  
51  
52  
53  
54  
55  
56  
57  
58  
59  
60

## 61 Introduction

62 An individual's health behavior can influence both physical health and ability to recover from an  
63 illness. Annual medical checkup is an example of a positive health behavior, as this preventative  
64 measure is associated with earlier disease detection, greater treatment success, and faster recovery  
65 from a disease <sup>1</sup>. For this reason, medical data obtained from primary care is a useful source as it  
66 includes information on symptoms and healthcare utilization, all beneficial for use in prediction  
67 analysis. Medical checkup data often includes a variety of diagnostic tests to assess health status  
68 for early detection and disease prevention. Additionally, medical checkup data provides valuable  
69 information on present and past health conditions that are generally difficult to obtain in most  
70 population-based data <sup>2</sup>. More specifically, medical checkup data is a reliable and objective  
71 measure for identifying chronic diseases such as hyperuricemia and obesity.

72  
73 Serum uric acid (SUA) is the final product of purine metabolism in humans, potentially resulting  
74 in hyperuricemia <sup>3,4</sup>. In China, the prevalence of hyperuricemia is 13.3%, with 19.4% for men and  
75 7.9% for women <sup>5</sup>. Additionally, in 2019 the obesity prevalence was nearing 12% in China.  
76 Among obese patients, hyperuricemia is commonly observed. Although changes in obesity was  
77 reported to be independently correlated with changes in uric acid concentration, there might be an  
78 interaction between them as suggested in prior pathophysiological and metabolic studies <sup>6</sup>.  
79 Epidemiological and clinical evidence supports a strong significant positive association between  
80 SUA and obesity in the adult population of China, Japan, India, Pakistan, and Iraq <sup>7</sup>. A cross-  
81 sectional study showed that body mass index (BMI) significantly increases with elevated SUA  
82 among 27,009 middle-aged and elderly Chinese adults <sup>8</sup>. Previous research showed that  
83 hyperuricemia can cause obesity by accelerating hepatic and peripheral lipogenesis <sup>9</sup>. With the  
84 increasing prevalence of obesity among adults with hyperuricemia, it is of public health  
85 importance to evaluate the long-term epidemiological transitions to develop policies centered on  
86 intervention.

87



1  
2  
3  
4 88 Numerous trend analyses have reported the association between SUA and BMI based on short-  
5  
6 89 term survey data in China<sup>10, 11</sup>. However, there remains a gap in evidence regarding the long-term  
7  
8 90 trend for providing estimates on the risks of obesity among Chinese adults during the last two  
9  
10 91 decades. Therefore, the present study aimed to examine the relationship between SUA and risk of  
11  
12 92 obesity using the 9-year medical checkup data among Chinese adults from 2010 to 2018.

13  
14 93

## 16 94 **Methods**

### 17 95 **Study design and subjects**

18  
19  
20  
21  
22 96 We conducted a large retrospective study in China. Medical examinations were performed in 2010  
23  
24 97 and 2018 at the Guangdong Second Provincial General Hospital in Guangzhou City, China  
25  
26 98 (**Figure 1**). Individuals were excluded from the study due to having (1) less than two medical  
27  
28 99 checkup; (2) absence of blood biochemical examination; and (3) no documented information on  
29  
30 100 BMI. Thus, a total of 15,959 participants were included in the study analysis (**Figure 2**).

31  
32 101

### 33 102 **Measurements**

34  
35  
36  
37 103 All participants were invited to participate in an in-person evaluation which included physical  
38  
39 104 examination and laboratory testing. Physical examinations were conducted following a  
40  
41 105 standardized protocol, including weight, height, waist circumference, hip circumference, and  
42  
43 106 blood pressure. Waist circumference was measured around the midway between the lowest border  
44  
45 107 of the ribs and iliac crest in the horizontal plane. The quality of anthropometric data was  
46  
47 108 confirmed by repeated measurements in the presence of researchers. Laboratory measurements  
48  
49 109 were obtained to measure SUA, systolic blood pressure (SBP), diastolic blood pressure (DBP),  
50  
51 110 total cholesterol (TC), triglycerides (TG), fasting plasma glucose (FPG), high-density lipoprotein  
52  
53 111 cholesterol (HDL-C), low-density lipoprotein cholesterol (LDL-C), creatinine (Cr) and blood urea  
54  
55 112 nitrogen (BUN).

56  
57  
58 113  
59  
60

## 114 **Outcomes and definitions**

115 Hyperuricemia was defined as having SUA concentrations  $>7.0$  mg/dL ( $416.4\mu\text{mol/L}$ ) in men  
116 or  $>6.0$  mg/dL ( $356.9\mu\text{mol/L}$ ) in women<sup>12,13</sup>. SUA levels were categorized into two groups  
117 (normal and high SUA) to compare the prevalence of obesity and its association with SUA. The  
118 high SUA level group was classified as participants with hyperuricemia. BMI was defined as  
119 weight divided by height<sup>2</sup> ( $\text{kg/m}^2$ ). Meanwhile, it was categorized into two groups (non-obese [ $<$   
120  $28$   $\text{kg/m}^2$ ] and obese [ $\geq 28$   $\text{kg/m}^2$ ]) based on the Asia-Pacific criteria set by the World Health  
121 Organization<sup>14,15</sup>. We excluded patients taken drugs that might affect uric acid metabolism, such  
122 as losartan, furosemide, and allopurinol. This study was approved by the Guangdong Second  
123 Provincial General Hospital.

## 125 **Statistical analysis**

126 We conducted descriptive analysis examining baselines participants. Continuous variables were  
127 reported as mean  $\pm$  standard derivation and categorical variables as frequency and percentage,  
128 unless otherwise specified. Comparisons between two groups (obese and non-obese) were  
129 performed using Student t-tests for continuous variables and Chi-square analyses for categorical  
130 data. Logistic regression model (LRM) was used to evaluate the relationship between risk of  
131 obesity and risk factors for the data at baseline. We also utilized generalized estimating equations  
132 (GEE) models with unstructured correlation structures to quantify their association between SUA  
133 and risk of obesity<sup>16</sup>, given the data on SUA and obesity were repeatedly measured over the 9-  
134 year study period. All the models were adjusted for age, gender, SBP, DBP, TC, TG, HDL-c,  
135 LDL-c, FPG, BUN, and CR in each group. Results were presented as odds ratio (OR) and 95%  
136 confidence interval (CI) with per-1  $\mu\text{mol/L}$  or per-SD increase in SUA.

137  
138 We performed subgroup analyses using GEE models by: 1) gender (male vs female); and 2) age  
139 group (young  $<65$  years vs. elderly  $\geq 65$  years). Additionally, we calculated the cut-off values of  
140 SUA for risk of obesity using the receiver operating characteristic (ROC) curves, based on the

1  
2  
3  
4 141 criteria including that (1) the point on the curve with minimum distance from the left-upper corner  
5  
6 142 of the unit square; and (2) the point where the Youden's index is maximum <sup>17</sup>. A two-sided p-  
7  
8 143 value less than 0.05 was considered as the statistically significant. Analyses were performed using  
9  
10 144 R version 3.5.3 (R Foundation for Statistical Computing, Vienna, Austria).

11  
12 145

### 146 **Patient and public involvement**

147 There was no patient and/or public involvement in the design of the study.

148

### 149 **Results**

150 There were 15,959 participants (10,023 males) included in this study. The average number of  
151 health checkup for each participant was 2.62. The participants had a mean age of 37.38 (SD:  
152 13.27) and a mean SUA of 367.05 (SD: 97.97) at baseline, respectively. There were 1,227 (7.6%)  
153 participants that were obese at baseline. Significant differences between the obese and non-obese  
154 groups were observed for SUA, age, gender, SBP, DBP, TC, TG, HDL-c, LDL-c, FPG, BUN, CR  
155 (p-value < 0.001) (**Table 1**). In total, the prevalence of obesity was approximately 14.2% for high  
156 SUA level. Obesity prevalence significantly increased with elevating SUA in the subgroup  
157 analysis by gender and age group (p-value < 0.001). The prevalence was higher in males when  
158 compared to females. However, the prevalence had no obvious trend for different age groups  
159 (**Table 2**). The prevalence of obesity significantly increased with the number of medical checkup  
160 years in the group with high SUA and normal SUA level (p<0.001 for trend) (**Figure 1**).

161

162 As presented in **Table 3**, we observed at baseline significant differences on risk of obesity for  
163 SUA [per-1 OR=1.01 (95% CI: 1.01,1.02)] or [per-SD OR=1.84 (95% CI: 1.77,1.90)], age  
164 [OR=1.02 (95% CI:1.02,1.03)], and male gender [OR=1.27 (95% CI:1.16,1.39)] in the logistic  
165 regression analysis (Model 1). When converted to categorical analysis, the OR value for SUA was  
166 greater for high level SUA compared to normal SUA. Additionally, the OR value was higher for

1  
2  
3  
4 167 elderly than young participants. Likewise, in the multivariable GEE model (Model 2) based on all  
5  
6 168 medical checkup participants, consistent risk factors for obesity were obtained. The estimates were  
7  
8 169 observed as follows: [per-1 OR= 1.01 (95% CI: 1.01,1.02)] or [per-SD OR=1.85 (95% CI:  
9  
10 170 1.77,1.91)] for SUA, OR =1.45 (95% CI: 1.32,1.60) for male, and OR =1.01 (1.01, 1.02) for age.  
11  
12 171 In additional analysis by categorical variables, we observed similar results with higher risk in male  
13  
14 172 and elderly participants.  
15

16 173

17  
18  
19 174 As shown in **Table 4**, similar results for GEE model analyses were observed in subgroup analyses.  
20  
21 175 Significant associations between SUA and obesity were observed, where female [per-SD OR=2.35  
22  
23 176 (2.16,2.55)] and young participants [per-SD OR=1.87 (1.80,1.94)] had an elevated risk. To  
24  
25 177 calculate the discrimination ability of SUA among obese participants at different times of medical  
26  
27 178 checkup (1 to 8) or different years of medical checkup (2010 to 2018), ROC curves were  
28  
29 179 calculated. **SFigure 1** and **SFigure 2** summarizes the cut-off values and the area under receiver  
30  
31 180 operating curves (AUCs) of SUA in obesity participants stratified by gender. We found that the  
32  
33 181 overall cut-off values of SUA in males were 429.5 $\mu$ mol/L (range: 411.5-488.5  $\mu$ mol/L) and in  
34  
35 182 females were 326.9 $\mu$ mol/L (range: 298.5-426.5  $\mu$ mol/L) when stratified by different times of  
36  
37 183 medical checkups. Similarly, we calculated the overall cut-off values for SUA , which was 429.5  
38  
39 184  $\mu$ mol/L (range: 366.7-431.5  $\mu$ mol/L) in males and was 326.9  $\mu$ mol/L (range: 301.5-362.1  $\mu$ mol/L)  
40  
41 185 in females when stratified by different years of medical checkups.  
42

43 186

## 44 187 **Discussion**

45  
46  
47  
48 188 To the best of our knowledge, this is the first longitudinal study that estimated the relationship  
49  
50 189 between SUA and obesity over a long time period in China. The prevalence of obesity was  
51  
52 190 approximately 14.2% for high SUA level. Previous studies found the prevalence of hyperuricemia  
53  
54 191 ranges from 2.5 to 25 % depending on the study population country<sup>18</sup>. For instance, the  
55  
56 192 prevalence rates were reported to be 5 % in the Caucasus and 24.4 % in Thailand<sup>19,20</sup>. Overall, we  
57  
58 193 found high SUA level was associated with increased risk of obesity, within OR value of 1.85  
59

1  
2  
3  
4 194 (1.77,1.91) in the GEE model for all participants, which was nearly consistent with prior studies <sup>21</sup>,  
5 195 <sup>22</sup>. Currently, obesity and hyperuricemia, as well as their associated health complications (e.g.  
6  
7 196 metabolic syndrome) have emerged as a major public health concern as a result of the growing  
8  
9 197 prevalence, and the estimated economic burden <sup>7</sup>.

10  
11  
12 198

13  
14  
15 199 Several recent studies have investigated the mechanism of SUA on increasing the risk of obesity,  
16  
17 200 suggesting the influence of overproduction and poor renal excretion <sup>23</sup>. Prior studies reported that  
18  
19 201 increase SUA level is closely related to excessive production of UA and the reduction of urinary  
20  
21 202 uric acid excretion and clearance <sup>24</sup>. Ultimately leading to increased risk of patients with visceral  
22  
23 203 fatty obesity <sup>23</sup>. Visceral fat accumulation (VFA) results in a large influx of plasma free fatty acids  
24  
25 204 into the portal vein and liver. This stimulates the synthesis of triglycerides and subsequently  
26  
27 205 produced large amounts of UA through the activated UA synthesis pathway <sup>25,26</sup>. Additionally,  
28  
29 206 many researchers have reported a significant correlation between VFA and BMI <sup>27,28</sup>. Therefore,  
30  
31 207 because of the close biological relationship between UA and BMI, it is of great importance for  
32  
33 208 preventive medicine to pay attention to the interaction between UA and BMI.

34  
35 209

36  
37 210 Conflicting results regarding gender and age differences for the association between SUA and  
38  
39 211 obesity have been reported <sup>10,29</sup>. Our study found significant differences in obesity participants  
40  
41 212 with elevated OR value among high SUA level, male, and elderly for all medical checkup  
42  
43 213 participants. A similar study reported a positive relationship between BMI and SUA levels among  
44  
45 214 healthy individuals in China <sup>30</sup>. Nevertheless, in this study the subgroup analyses showed that  
46  
47 215 significant associated risk between SUA and obesity were observed higher in female and young  
48  
49 216 participants. This is consistent with a Thailand study that reported high SUA concentrations were  
50  
51 217 associated with greater risk of obesity in females <sup>31</sup>. However, a Bangladeshi study and a Japanese  
52  
53 218 study reported that elevated SUA predicted obesity higher in males and the elderly <sup>8,29,31</sup>. Perhaps  
54  
55 219 the associations of SUA with obesity varies based on population. Moreover, in a 10-year follow-  
56  
57 220 up study, BMI was observed to significantly increase with higher SUA levels regardless of race

1  
2  
3  
4 221 and gender<sup>32</sup>. Therefore, greater attention should be provided to these vulnerable populations in  
5  
6 222 clinical guidelines.

7  
8 223

9  
10  
11 224 An important observation was that the association between SUA and risk of obesity in the LRM  
12  
13 225 [OR=1.84 (1.77,1.90)] for data at baseline was nearly consistent with the analyses in GEE model  
14  
15 226 [OR= (1.85 (1.77,1.91))] for 9-year all participants. The risk of obesity within hyperuricemia  
16  
17 227 remained stable over the years. Therefore, short-term medical checkup results can be reflected the  
18  
19 228 development of chronic diseases<sup>33</sup>. Regarding the assessment of cut-off values from receiver  
20  
21 229 operating curves (ROC) of SUA in obesity participants, the cut-off values of SUA in males was  
22  
23 230 429.5 $\mu$ mol/L and in females was 326.9 $\mu$ mol/L in stratified analysis by times or years of medical  
24  
25 231 checkup. The cut-off value was approximately consistent with the international standard for males  
26  
27 232<sup>34</sup>. However, it was underestimated for women in the group of obese participants. Perhaps the  
28  
29 233 proportion of females were fewer in this study. The cut-off values of SUA in the study may be  
30  
31 234 useful for on distinguishing tests among obesity and non-obesity participants, which were  
32  
33 235 significant for certain risk value prediction and guidance<sup>35</sup>.

34  
35 236

36  
37 237 We must note several limitations in the present study. First, the underlying mechanism by which  
38  
39 238 SUA is increased in obese individuals remains not well understood. Second, this study did not  
40  
41 239 collect information on whether participants were prescribed medication to treat hyperuricemia.  
42  
43 240 Third, there are numerous confounding factors that have not been considered, which can be  
44  
45 241 studied together with questionnaires in the future. Moreover, the younger screening population in  
46  
47 242 this study may underestimate the increased risk of uric acid among the elderly obese.

48  
49  
50 243

51  
52 244 The present study has several strengths that must be noted. First, to our knowledge this is the first  
53  
54 245 large long-term medical checkup study to explore the relationship between SUA and obesity in  
55  
56 246 China. Second, the study analysis was based on the GEE model with high quality data by  
57  
58 247 controlling for confounding factors, which can increase the accuracy of the prediction. Third,

1  
2  
3  
4  
5  
6  
7  
8  
9  
10  
11  
12  
13  
14  
15  
16  
17  
18  
19  
20  
21  
22  
23  
24  
25  
26  
27  
28  
29  
30  
31  
32  
33  
34  
35  
36  
37  
38  
39  
40  
41  
42  
43  
44  
45  
46  
47  
48  
49  
50  
51  
52  
53  
54  
55  
56  
57  
58  
59  
60

248 participants were representative of the general population with regard to clinical checkup and  
249 obesity status, enhancing the generalizability of our findings. Moreover, results from this study  
250 could inform prevention methods for obesity, especially in medically underserved areas where  
251 medical service is insufficient.

252

253 The present study filled current gaps in literature by analyzing the relationship between SUA and  
254 obesity using medical checkup data. We observed that medical checkup data can be used to improve  
255 risk of obesity prediction accuracy. The medical checkup data used in this study can help provide  
256 information that will facilitate intervention development and adoption at the individual level<sup>36</sup>. We  
257 believe that the utility of medical checkup data will reach beyond predictive power alone in the near  
258 future.

259

## 260 **Conclusions**

261 In conclusion, our study observed significant associations between SUA and obesity in this 9-year  
262 follow-up data. We mainly found higher SUA level was associated with increased risk of obesity.  
263 The prevalence of obesity was approximately 14.2% and significantly increased with the number  
264 of medical checkup years in the group of high SUA. Additionally, the increased risk of obesity was  
265 greater for high SUA level, male, and elderly participants. Subgroup analyses revealed significant  
266 associations between SUA and obesity with higher risk in female and young participants.  
267 Additionally, the cut-off for SUA on risk of obesity were approximately consistent with the  
268 international standard. More evidence from well-designed studies are needed to confirm our  
269 findings.

**Author Contributions:**

Guowei Li, Jie Zeng, Cheng Li: conceived and designed the study.

Guowei Li, Jie Zeng, Wayne R. Lawrence, Jun Yang: acquired data, performed statistical analyses and interpretation, and drafted the manuscript.

Junzhang Tian, Guanming Li, Wanmin Lian, Jingjun He, Hongying Qu, Xiaojie Wang: provided professional and statistical support, and made several critical revisions to the manuscript.

All authors read and approved the final manuscript.

**Acknowledgments:**

None declared.

**Conflicts of Interest:**

The authors declare that they have no conflict of interest.

**Funding:**

Research grants from the Science Foundation of Guangdong Second Provincial General Hospital (YQ2019-008).



## Reference

1. Nagahama S, Kashino I, Hu H, Nanri A, Kurotani K, Kuwahara K *et al.* Haemoglobin A1c and hearing impairment: longitudinal analysis using a large occupational health check-up data of Japan. *BMJ open* 2018; **8**(9): e023220.
2. Kim YJ, Park H. Improving Prediction of High-Cost Health Care Users with Medical Check-Up Data. *Big data* 2019; **7**(3): 163-175.
3. Global Burden of Disease Study C. Global, regional, and national incidence, prevalence, and years lived with disability for 301 acute and chronic diseases and injuries in 188 countries, 1990-2013: a systematic analysis for the Global Burden of Disease Study 2013. *Lancet* 2015; **386**(9995): 743-800.
4. Ng M, Fleming T, Robinson M, Thomson B, Graetz N, Margono C *et al.* Global, regional, and national prevalence of overweight and obesity in children and adults during 1980-2013: a systematic analysis for the Global Burden of Disease Study 2013. *Lancet* 2014; **384**(9945): 766-81.
5. Liu R, Han C, Wu D, Xia X, Gu J, Guan H *et al.* Prevalence of Hyperuricemia and Gout in Mainland China from 2000 to 2014: A Systematic Review and Meta-Analysis. *BioMed research international* 2015; **2015**: 762820.
6. Ishizaka N, Ishizaka Y, Toda A, Tani M, Koike K, Yamakado M *et al.* Changes in waist circumference and body mass index in relation to changes in serum uric acid in Japanese individuals. *The Journal of rheumatology* 2010; **37**(2): 410-6.
7. Chen MY, Zhao CC, Li TT, Zhu Y, Yu TP, Bao YQ *et al.* Serum uric acid levels are associated with obesity but not cardio-cerebrovascular events in Chinese inpatients with type 2 diabetes. *Scientific reports* 2017; **7**: 40009.
8. Dai X, Yuan J, Yao P, Yang B, Gui L, Zhang X *et al.* Association between serum uric acid and the metabolic syndrome among a middle- and old-age Chinese population. *European journal of epidemiology* 2013; **28**(8): 669-76.
9. Johnson RJ, Lanaspas MA, Gaucher EA. Uric acid: a danger signal from the RNA world that may have a role in the epidemic of obesity, metabolic syndrome, and cardiorenal disease: evolutionary considerations. *Seminars in nephrology* 2011; **31**(5): 394-9.
10. Ali N, Perveen R, Rahman S, Mahmood S, Rahman S, Islam S. Prevalence of hyperuricemia and the relationship between serum uric acid and obesity: A study on Bangladeshi adults. 2018; **13**(11): e0206850.
11. Yang C, Yang S, Feng C, Zhang C, Xu W, Zhang L *et al.* Associations of hyperuricemia and obesity with remission of nonalcoholic fatty liver disease among Chinese men: A retrospective cohort study. *PloS one* 2018; **13**(2): e0192396.
12. Sui X, Church TS, Meriwether RA, Lobelo F, Blair SN. Uric acid and the development of metabolic

- 1  
2  
3 syndrome in women and men. *Metabolism: clinical and experimental* 2008; **57**(6): 845-52.  
4  
5  
6 13. You L, Liu A, Wuyun G, Wu H, Wang P. Prevalence of hyperuricemia and the relationship  
7 between serum uric acid and metabolic syndrome in the Asian Mongolian area. *Journal of*  
8 *atherosclerosis and thrombosis* 2014; **21**(4): 355-65.  
9  
10 14. WHO. Appropriate body-mass index for Asian populations and its implications for policy and  
11 intervention strategies. *Lancet* 2004; **363**(9403): 157-63.  
12  
13 15. Li MF, Ren Y, Zhao CC, Zhang R, Li LX, Liu F *et al*. Prevalence and clinical characteristics of  
14 lower limb atherosclerotic lesions in newly diagnosed patients with ketosis-onset diabetes: a  
15 cross-sectional study. *Diabetology & metabolic syndrome* 2014; **6**: 71.  
16  
17 16. Buzkova P, Brown ER, John-Stewart GC. Longitudinal data analysis for generalized linear  
18 models under participant-driven informative follow-up: an application in maternal health  
19 epidemiology. *American journal of epidemiology* 2010; **171**(2): 189-97.  
20  
21 17. Habibzadeh F, Habibzadeh P, Yadollahie M. On determining the most appropriate test cut-off  
22 value: the case of tests with continuous results. *Biochemia medica* 2016; **26**(3): 297-307.  
23  
24 18. Remedios C, Shah M, Bhasker AG, Lakdawala M. Hyperuricemia: a reality in the Indian obese.  
25 *Obesity surgery* 2012; **22**(6): 945-8.  
26  
27 19. Uaratanawong S, Suraamornkul S, Angkeaw S, Uaratanawong R. Prevalence of hyperuricemia  
28 in Bangkok population. *Clinical rheumatology* 2011; **30**(7): 887-93.  
29  
30 20. Ford DK, Demos AM. Serum Uric Acid Levels of Healthy Caucasian, Chinese and Haida Indian  
31 Males in British Columbia. *Canadian Medical Association journal* 1964; **90**: 1295-7.  
32  
33 21. Kuwabara M, Kuwabara R, Hisatome I, Niwa K, Roncal-Jimenez CA, Bjornstad P *et al*.  
34 "Metabolically Healthy" Obesity and Hyperuricemia Increase Risk for Hypertension and  
35 Diabetes: 5-year Japanese Cohort Study. *Obesity* 2017; **25**(11): 1997-2008.  
36  
37 22. Zhang N, Chang Y, Guo X, Chen Y, Ye N, Sun Y. A Body Shape Index and Body Roundness  
38 Index: Two new body indices for detecting association between obesity and hyperuricemia in  
39 rural area of China. *European journal of internal medicine* 2016; **29**: 32-6.  
40  
41 23. Matsuura F, Yamashita S, Nakamura T, Nishida M, Nozaki S, Funahashi T *et al*. Effect of  
42 visceral fat accumulation on uric acid metabolism in male obese subjects: visceral fat obesity  
43 is linked more closely to overproduction of uric acid than subcutaneous fat obesity.  
44 *Metabolism: clinical and experimental* 1998; **47**(8): 929-33.  
45  
46 24. Han T, Meng X, Shan R, Zi T, Li Y, Ma H *et al*. Temporal relationship between hyperuricemia  
47 and obesity, and its association with future risk of type 2 diabetes. *International journal of*  
48 *obesity (2005)* 2018; **42**(7): 1336-1344.  
49  
50 25. Fabregat I, Revilla E, Machado A. Short-term control of the pentose phosphate cycle by  
51 insulin could be modulated by the NADPH/NADP ratio in rat adipocytes and hepatocytes.  
52 *Biochemical and biophysical research communications* 1987; **146**(2): 920-5.  
53  
54  
55  
56  
57  
58  
59  
60

- 1  
2  
3  
4  
5  
6  
7  
8  
9  
10  
11  
12  
13  
14  
15  
16  
17  
18  
19  
20  
21  
22  
23  
24  
25  
26  
27  
28  
29  
30  
31  
32  
33  
34  
35  
36  
37  
38  
39  
40  
41  
42  
43  
44  
45  
46  
47  
48  
49  
50  
51  
52  
53  
54  
55  
56  
57  
58  
59  
60
26. Fox IH. Metabolic basis for disorders of purine nucleotide degradation. *Metabolism: clinical and experimental* 1981; **30**(6): 616-34.
  27. Examination Committee of Criteria for 'Obesity Disease' in J, Japan Society for the Study of O. New criteria for 'obesity disease' in Japan. *Circulation journal : official journal of the Japanese Circulation Society* 2002; **66**(11): 987-92.
  28. Oka R, Miura K, Sakurai M, Nakamura K, Yagi K, Miyamoto S *et al.* Comparison of waist circumference with body mass index for predicting abdominal adipose tissue. *Diabetes research and clinical practice* 2009; **83**(1): 100-5.
  29. Tanaka K, Ogata S, Tanaka H, Omura K, Honda C, Hayakawa K. The relationship between body mass index and uric acid: a study on Japanese adult twins. *Environmental health and preventive medicine* 2015; **20**(5): 347-53.
  30. Wang H, Wang L, Xie R, Dai W, Gao C, Shen P *et al.* Association of Serum Uric Acid with Body Mass Index: A Cross-Sectional Study from Jiangsu Province, China. *Iranian journal of public health* 2014; **43**(11): 1503-9.
  31. Jaipakdee J, Jiamjarasrangsri W, Lohsoonthorn V, Lertmaharit S. Prevalence of metabolic syndrome and its association with serum uric acid levels in Bangkok Thailand. *The Southeast Asian journal of tropical medicine and public health* 2013; **44**(3): 512-22.
  32. Rathmann W, Haastert B, Icks A, Giani G, Roseman JM. Ten-year change in serum uric acid and its relation to changes in other metabolic risk factors in young black and white adults: the CARDIA study. *European journal of epidemiology* 2007; **22**(7): 439-45.
  33. Nohara Y, Kai E. Health checkup and telemedical intervention program for preventive medicine in developing countries: verification study. 2015; **17**(1): e2.
  34. Bardin T, Richette P. Definition of hyperuricemia and gouty conditions. *Current opinion in rheumatology* 2014; **26**(2): 186-91.
  35. Mongioi LM, Condorelli RA, Barbagallo F, Cannarella R, La Vignera S, Calogero AE. Accuracy of the Low-Dose ACTH Stimulation Test for Adrenal Insufficiency Diagnosis: A Re-Assessment of the Cut-Off Value. *Journal of clinical medicine* 2019; **8**(6).
  36. Taninaga J, Nishiyama Y. Prediction of future gastric cancer risk using a machine learning algorithm and comprehensive medical check-up data: A case-control study. 2019; **9**(1): 12384.

1  
2  
3  
4 **Tables and Figure legends:**

5 **Table 1.** Baseline characteristics and comparison between obesity and non-obesity participants.  
6  
7

8  
9 **Table 2.** The prevalence of obesity by gender, age of checkup stratified by baseline SUA.  
10  
11

12  
13 **Table 3.** Relationship between risk factors and risk of obesity in the models.  
14  
15

16 **Table 4.** Relationship between risk factors and risk of obesity in the models stratified by gender  
17 and age group.  
18  
19

20  
21  
22 **Figure 1.** Location of Guangdong Second Provincial General Hospital (Guangzhou,  
23 Guangdong, China) and the prevalence of obesity by different years stratified by baseline SUA.  
24  
25

26  
27 **Figure 2.** Flow diagram showing selection process of participants in our study.  
28  
29

30  
31  
32  
33  
34 **Supplemental data:**

35  
36  
37 **Supplementary Figure 1.** The ROC curves showing the relationship between SUA and risk of  
38 obesity stratified by gender and different times of medical checkups.  
39  
40

41  
42 **Supplementary Figure 2.** The ROC curves showing the relationship between SUA and risk of  
43 obesity stratified by gender and different years of medical checkups (from 2010 to 2018).  
44  
45  
46  
47  
48  
49  
50  
51  
52  
53  
54  
55  
56

57  
58 **Table 1.** Baseline characteristics and comparison between obesity and non-obesity participants.  
59  
60

| Characteristics     | All patients   | Obesity <sup>a</sup> | Non-obesity    | <i>p</i> -value <sup>b</sup> |
|---------------------|----------------|----------------------|----------------|------------------------------|
|                     | n=15959        | n=1227               | n=14732        |                              |
| SUA (μmol/L) [SD]   | 367.05 (97.97) | 434.95 (97.65)       | 361.32 (95.82) | <0.001                       |
| Age (years) [SD]    | 37.38 (13.27)  | 40.40 (13.40)        | 37.13 (13.23)  | <0.001                       |
| Male [n, (%)]       | 10023 (62.8)   | 1012 (82.5)          | 9011 (61.2)    | <0.001                       |
| SBP (mmHg) [SD]     | 121.09 (15.85) | 131.78 (16.47)       | 120.19 (15.47) | <0.001                       |
| DBP (mmHg) [SD]     | 73.84 (10.31)  | 81.16 (11.41)        | 73.23 (9.97)   | <0.001                       |
| TC (mmol/L) [SD]    | 4.88 (0.93)    | 5.19 (0.95)          | 4.86 (0.93)    | <0.001                       |
| TG (mmol/L) [SD]    | 1.46 (1.10)    | 2.18 (1.49)          | 1.40 (1.04)    | <0.001                       |
| HDL-c (mmol/L) [SD] | 1.26 (0.25)    | 1.15 (0.22)          | 1.27 (0.25)    | <0.001                       |
| LDL-c (mmol/L) [SD] | 2.92 (0.78)    | 3.20 (0.80)          | 2.90 (0.77)    | <0.001                       |
| FPG (mmol/L) [SD]   | 5.06 (1.04)    | 5.51 (1.61)          | 5.03 (0.97)    | <0.001                       |
| BUN (mmol/L) [SD]   | 4.78 (1.25)    | 5.07 (1.30)          | 4.75 (1.24)    | <0.001                       |
| CR (mmol/L) [SD]    | 94.57 (17.12)  | 100.05 (16.17)       | 94.11 (17.12)  | <0.001                       |

**Note:** Continuous variables are presented as the means (standard derivation); SUA, serum uric acid; SBP, systolic blood pressure; DBP, diastolic blood pressure; TC, total cholesterol; TG, triglycerides; HDL-c, high-density lipoprotein cholesterol; LDL-c, low-density lipoprotein cholesterol; FPG, fasting plasma glucose; BUN, blood urea nitrogen; Cr, creatinine.

<sup>a</sup> Obesity was defined as body mass index (BMI)  $\geq 28.0$  kg/m<sup>2</sup>.

<sup>b</sup> *p* value for the difference of variables between the two datasets based on independent sample t-test or chi-square test.

\*The average number of health checkup for each participant is 2.62.

**Table 2.** The prevalence of obesity by gender, age of checkup stratified by baseline SUA.

| Variable         | Obesity prevalence, n (%) <sup>a</sup> |                 |         |
|------------------|----------------------------------------|-----------------|---------|
|                  | Normal SUA                             | High SUA        | P-value |
| <b>Gender</b>    |                                        |                 |         |
| Male             | 357/5280 (6.8)                         | 570/3768 (15.1) | <0.001  |
| Female           | 104/4431 (2.3)                         | 97/937 (10.3)   | <0.001  |
| <b>Age group</b> |                                        |                 |         |
| <30              | 88/3509 (2.5)                          | 168/1643 (10.2) | <0.001  |
| 30-44            | 182/3736 (4.9)                         | 309/1692 (18.3) | <0.001  |
| 45-59            | 121/1727 (7.0)                         | 125/865 (14.5)  | <0.001  |
| 60-74            | 54/606 (8.9)                           | 53/378 (14.0)   | <0.001  |
| ≥75              | 11/134 (8.2)                           | 12/127 (9.4)    | <0.001  |
| <b>Overall</b>   | 456/9711 (4.6)                         | 669/4705 (14.2) | <0.001  |

**Note:** High SUA level was defined as the SUA greater than 420 mmol/L in men and greater than 360 mmol/L in women, while the others are normal.

<sup>a</sup>Obesity prevalence = (n of obesity) / (total participants).

**Table 3.** Relationship between risk factors and risk of obesity in the models.

| Variable                    | Model 1 <sup>c</sup>                  |         | Model 2 <sup>d</sup>                  |         |
|-----------------------------|---------------------------------------|---------|---------------------------------------|---------|
|                             | OR <sup>a</sup> (95%CI <sup>b</sup> ) | p-value | OR <sup>a</sup> (95%CI <sup>b</sup> ) | p-value |
| <b>Continuous analysis</b>  |                                       |         |                                       |         |
| <b>SUA (μmol/L)</b>         |                                       |         |                                       |         |
| Per-1                       | 1.01 (1.01,1.02)                      | <0.001  | 1.01 (1.01,1.02)                      | <0.001  |
| Per-SD                      | 1.84 (1.77,1.90)                      | <0.001  | 1.85 (1.77,1.91)                      | <0.001  |
| <b>Gender [n, (%)]</b>      |                                       |         |                                       |         |
| Female                      | Reference                             |         | Reference                             |         |
| Male                        | 1.27 (1.16,1.39)                      | <0.001  | 1.45 (1.32,1.60)                      | <0.001  |
| Age (years)                 | 1.02 (1.02, 1.03)                     | <0.001  | 1.01 (1.01, 1.02)                     | <0.001  |
| <b>Categorical analysis</b> |                                       |         |                                       |         |
| <b>SUA<sup>e</sup></b>      |                                       |         |                                       |         |
| Normal SUA                  | Reference                             |         | Reference                             |         |
| High SUA                    | 2.02 (1.84, 2.23)                     | <0.001  | 2.57 (2.31, 2.87)                     | <0.001  |
| <b>Gender</b>               |                                       |         |                                       |         |
| Female                      | Reference                             |         | Reference                             |         |
| Male                        | 1.25 (1.09, 1.43)                     | 0.002   | 1.69 (1.59, 1.79)                     | <0.001  |
| <b>Age group</b>            |                                       |         |                                       |         |
| <30                         | Reference                             |         | Reference                             |         |
| 30-44                       | 1.38 (1.14, 1.66)                     | 0.001   | 1.73 (1.54, 1.91)                     | <0.001  |
| 45-59                       | 1.07 (0.89, 1.30)                     | 0.475   | 1.94 (1.72, 2.18)                     | <0.001  |
| 60-74                       | 1.12 (0.90, 1.38)                     | 0.314   | 1.99 (1.72, 2.32)                     | <0.001  |
| ≥75                         | 0.95 (0.71, 1.27)                     | 0.718   | 1.86(1.50, 2.31)                      | <0.001  |

**Note:** <sup>a</sup>OR: odds ratio; <sup>b</sup>CI: confidence interval.

<sup>c</sup>Model 1 was adjusted for the variables of SBP, DBP, TC, TG, HDL-c, LDL-c, FPG, BUN, CR based on the first time of medical checkup participants by using multivariate logistic regression model (LRM).

<sup>d</sup>Model 2 was adjusted for the variables of repeated times or years of medical checkup, SBP, DBP, TC, TG, HDL-c, LDL-c, FPG, BUN, CR based on all medical checkup participants by using generalized estimation equation model (GEE).

<sup>e</sup>High SUA level was defined as the SUA greater than 420 mmol/L in men and greater than 360 mmol/L in women, while the others are normal.

**Table 4.** Relationship between risk factors and risk of obesity in the models stratified by gender and age group.

| Variable                     | Generalized estimation equation model (GEE) <sup>c</sup> |                |                                           |                |
|------------------------------|----------------------------------------------------------|----------------|-------------------------------------------|----------------|
|                              | Male                                                     |                | Female                                    |                |
| Gender                       | <i>OR<sup>a</sup> (95%CI<sup>b</sup>)</i>                | <i>p-value</i> | <i>OR<sup>a</sup> (95%CI<sup>b</sup>)</i> | <i>p-value</i> |
| <b>Continuous variable</b>   |                                                          |                |                                           |                |
| <b>SUA (μmol/L)</b>          |                                                          |                |                                           |                |
| Per-1                        | 1.01 (1.01,1.02)                                         | <0.001         | 1.01 (1.01,1.02)                          | <0.001         |
| Per-SD                       | 1.70 (1.64,1.77)                                         | <0.001         | 2.35 (2.16,2.55)                          | <0.001         |
| <b>Categorical variables</b> |                                                          |                |                                           |                |
| <b>SUA</b>                   |                                                          |                |                                           |                |
| Normal SUA                   | Reference                                                |                | Reference                                 |                |
| High SUA                     | 2.40 (2.23,2.59)                                         | <0.001         | 3.79 (3.23,4.45)                          | <0.001         |
| Age group                    | Young (<65 year)                                         |                | Elderly (≥65 year)                        |                |
|                              | <i>OR<sup>a</sup> (95%CI<sup>b</sup>)</i>                | <i>p-value</i> | <i>OR<sup>a</sup> (95%CI<sup>b</sup>)</i> | <i>p-value</i> |
| <b>Continuous variable</b>   |                                                          |                |                                           |                |
| <b>SUA (μmol/L)</b>          |                                                          |                |                                           |                |
| Per-1                        | 1.01 (1.01,1.02)                                         | <0.001         | 1.00 (1.00,1.01)                          | <0.001         |
| Per-SD                       | 1.87 (1.80,1.94)                                         | <0.001         | 1.48 (1.34,1.62)                          | <0.001         |
| <b>Categorical variables</b> |                                                          |                |                                           |                |
| <b>SUA</b>                   |                                                          |                |                                           |                |
| Normal SUA                   | Reference                                                |                | Reference                                 |                |
| High SUA                     | 2.78 (2.58,2.99)                                         | <0.001         | 1.99 (1.63,2.43)                          | <0.001         |

**Note:** <sup>a</sup>OR: odds ratio; <sup>b</sup>CI: confidence interval.

<sup>c</sup>Model was adjusted for the variables of repeated times or years of medical checkup, age, sex, SBP, DBP, TC, TG, HDL-c, LDL-c, FPG, BUN, CR based on all medical checkup participants by using generalized estimation equation model (GEE).

<sup>e</sup>High SUA level was defined as the SUA greater than 420 mmol/L in men and greater than 360 mmol/L in women, while the others are normal.



1  
2  
3  
4  
5  
6  
7  
8  
9  
10  
11  
12  
13  
14  
15  
16  
17  
18  
19  
20  
21  
22  
23  
24  
25  
26  
27  
28  
29  
30  
31  
32  
33  
34  
35  
36  
37  
38  
39  
40  
41  
42  
43  
44  
45  
46  
47  
48  
49  
50  
51  
52  
53  
54  
55  
56  
57  
58  
59  
60

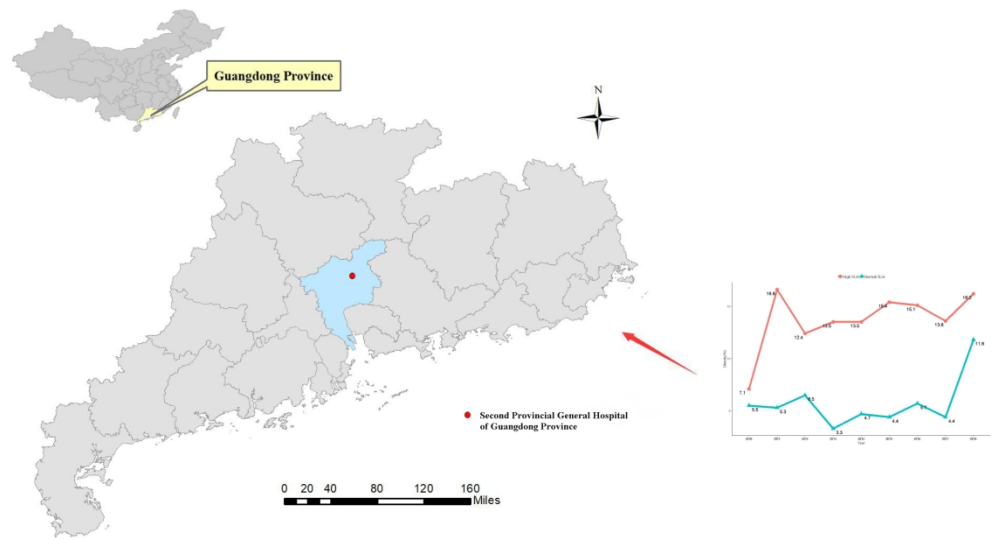

240x140mm (300 x 300 DPI)

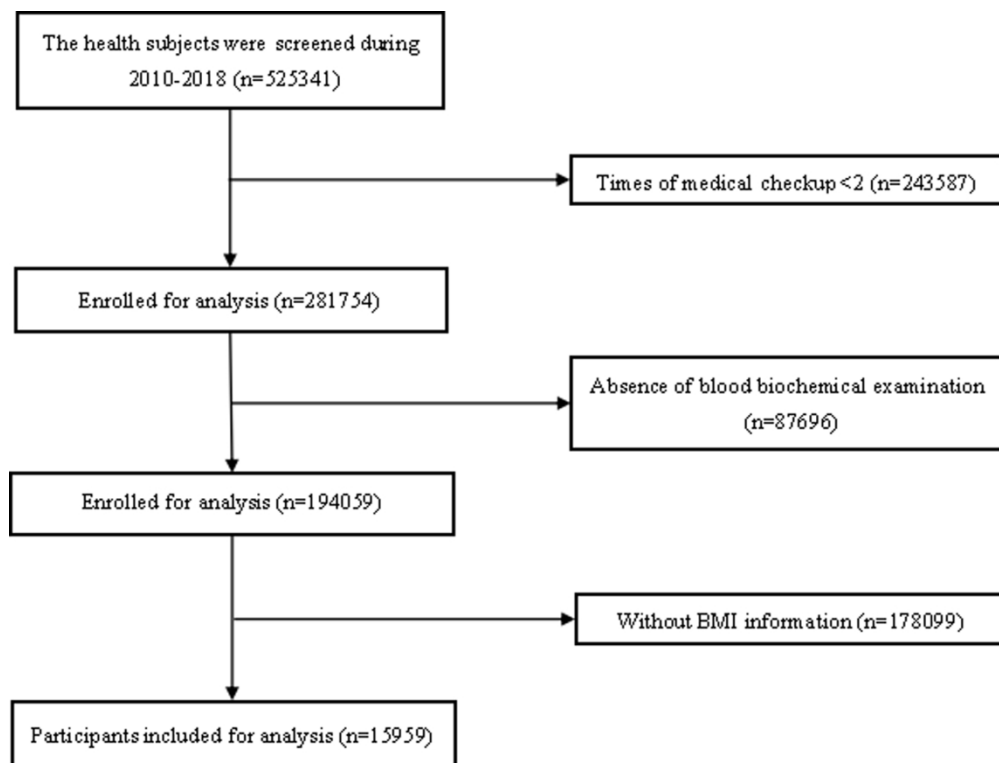

155x117mm (300 x 300 DPI)

1  
2  
3  
4  
5  
6  
7  
8  
9  
10  
11  
12  
13  
14  
15  
16  
17  
18  
19  
20  
21  
22  
23  
24  
25  
26  
27  
28  
29  
30  
31  
32  
33  
34  
35  
36  
37  
38  
39  
40  
41  
42  
43  
44  
45  
46  
47  
48  
49  
50  
51  
52  
53  
54  
55  
56  
57  
58  
59  
60

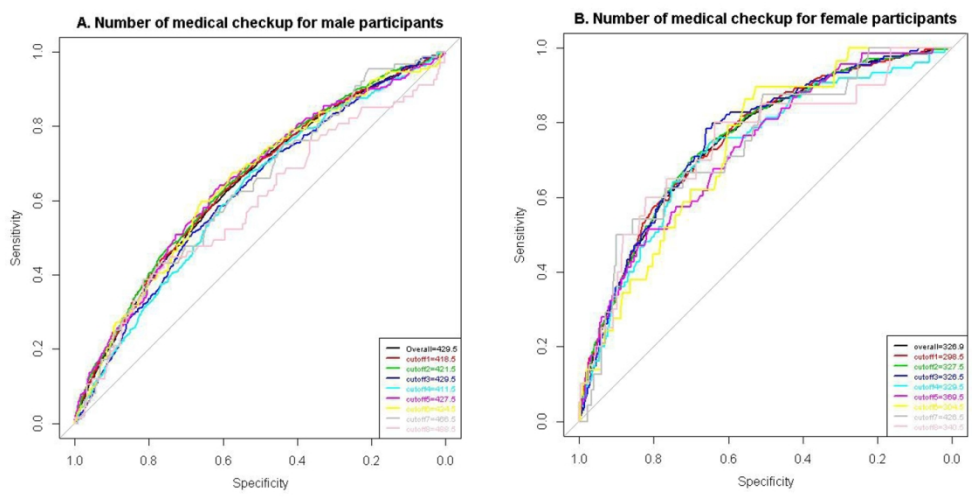

127x63mm (300 x 300 DPI)

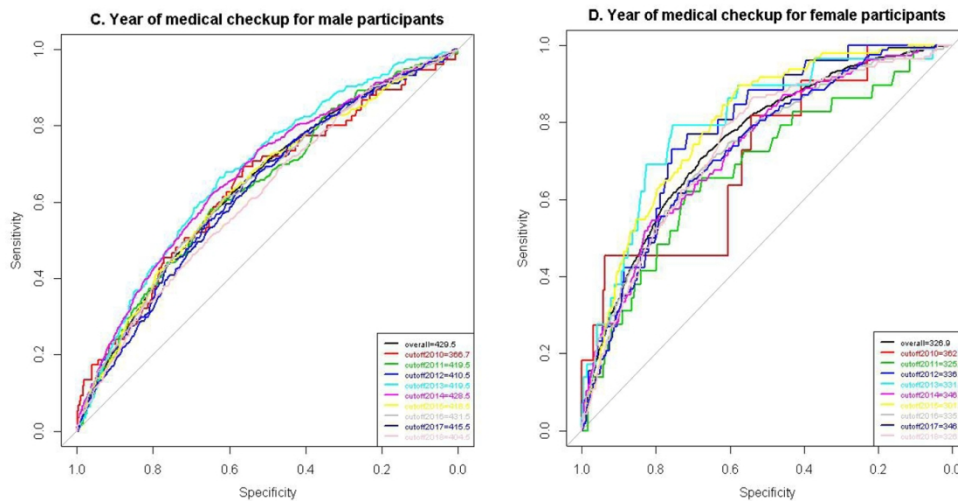

127x64mm (300 x 300 DPI)

# BMJ Open

## Association between serum uric acid and obesity in Chinese adults: A nine-year longitudinal data analysis

|                                 |                                                                                                                                                                                                                                                                                                                                                                                                                                                                                                                                                                                                                                                                                                                                                                                                                                                                                                                                                                                                                                                                                                                                                                                                                                                                                                                                          |
|---------------------------------|------------------------------------------------------------------------------------------------------------------------------------------------------------------------------------------------------------------------------------------------------------------------------------------------------------------------------------------------------------------------------------------------------------------------------------------------------------------------------------------------------------------------------------------------------------------------------------------------------------------------------------------------------------------------------------------------------------------------------------------------------------------------------------------------------------------------------------------------------------------------------------------------------------------------------------------------------------------------------------------------------------------------------------------------------------------------------------------------------------------------------------------------------------------------------------------------------------------------------------------------------------------------------------------------------------------------------------------|
| Journal:                        | <i>BMJ Open</i>                                                                                                                                                                                                                                                                                                                                                                                                                                                                                                                                                                                                                                                                                                                                                                                                                                                                                                                                                                                                                                                                                                                                                                                                                                                                                                                          |
| Manuscript ID                   | bmjopen-2020-041919.R1                                                                                                                                                                                                                                                                                                                                                                                                                                                                                                                                                                                                                                                                                                                                                                                                                                                                                                                                                                                                                                                                                                                                                                                                                                                                                                                   |
| Article Type:                   | Original research                                                                                                                                                                                                                                                                                                                                                                                                                                                                                                                                                                                                                                                                                                                                                                                                                                                                                                                                                                                                                                                                                                                                                                                                                                                                                                                        |
| Date Submitted by the Author:   | 26-Aug-2020                                                                                                                                                                                                                                                                                                                                                                                                                                                                                                                                                                                                                                                                                                                                                                                                                                                                                                                                                                                                                                                                                                                                                                                                                                                                                                                              |
| Complete List of Authors:       | Zeng, Jie; Guangdong Second Provincial General Hospital, Center for Clinical Epidemiology and Methodology<br>Lawrence, Wayne R; University at Albany State University of New York, Department of Epidemiology and Biostatistics<br>Yang, Jun; Jinan University, Institute for Environmental and Climate Research<br>Tian, Junzhang; Guangdong Second Provincial General Hospital, Center for Clinical Epidemiology and Methodology<br>Li, Cheng; Guangdong Second Provincial General Hospital, Guangdong Traditional Medical and Sports Injury Rehabilitation Research Institute<br>Lian, Wanmin; Guangdong Second Provincial General Hospital, Center for Information<br>He, Jingjun; Guangdong Second Provincial General Hospital, Center for Health Management and Examination<br>Qu, Hongying; Guangdong Second Provincial General Hospital, Center for Clinical Epidemiology and Methodology<br>Wang, Xiaojie; Guangdong Second Provincial General Hospital, Center for Clinical Epidemiology and Methodology<br>Liu, Hongmei; Guangdong Second Provincial General Hospital, Department of Ultrasound<br>Li, Guanming; Guangdong Second Provincial General Hospital, Center for Clinical Epidemiology and Methodology<br>Li, Guowei; Guangdong Second Provincial General Hospital, Center for Clinical Epidemiology and Methodology |
| <b>Primary Subject Heading</b>: | Epidemiology                                                                                                                                                                                                                                                                                                                                                                                                                                                                                                                                                                                                                                                                                                                                                                                                                                                                                                                                                                                                                                                                                                                                                                                                                                                                                                                             |
| Secondary Subject Heading:      | Rheumatology, Public health                                                                                                                                                                                                                                                                                                                                                                                                                                                                                                                                                                                                                                                                                                                                                                                                                                                                                                                                                                                                                                                                                                                                                                                                                                                                                                              |
| Keywords:                       | Public health < INFECTIOUS DISEASES, Risk management < HEALTH SERVICES ADMINISTRATION & MANAGEMENT, Epidemiology < TROPICAL MEDICINE                                                                                                                                                                                                                                                                                                                                                                                                                                                                                                                                                                                                                                                                                                                                                                                                                                                                                                                                                                                                                                                                                                                                                                                                     |
|                                 |                                                                                                                                                                                                                                                                                                                                                                                                                                                                                                                                                                                                                                                                                                                                                                                                                                                                                                                                                                                                                                                                                                                                                                                                                                                                                                                                          |

SCHOLARONE™  
Manuscripts

1  
2  
3  
4  
5  
6  
7  
8  
9  
10  
11  
12  
13  
14  
15  
16  
17  
18  
19  
20  
21  
22  
23  
24  
25  
26  
27  
28  
29  
30  
31  
32  
33  
34  
35  
36  
37  
38  
39  
40  
41  
42  
43  
44  
45  
46  
47  
48  
49  
50  
51  
52  
53  
54  
55  
56  
57  
58  
59  
60



I, the Submitting Author has the right to grant and does grant on behalf of all authors of the Work (as defined in the below author licence), an exclusive licence and/or a non-exclusive licence for contributions from authors who are: i) UK Crown employees; ii) where BMJ has agreed a CC-BY licence shall apply, and/or iii) in accordance with the terms applicable for US Federal Government officers or employees acting as part of their official duties; on a worldwide, perpetual, irrevocable, royalty-free basis to BMJ Publishing Group Ltd ("BMJ") its licensees and where the relevant Journal is co-owned by BMJ to the co-owners of the Journal, to publish the Work in this journal and any other BMJ products and to exploit all rights, as set out in our [licence](#).

The Submitting Author accepts and understands that any supply made under these terms is made by BMJ to the Submitting Author unless you are acting as an employee on behalf of your employer or a postgraduate student of an affiliated institution which is paying any applicable article publishing charge ("APC") for Open Access articles. Where the Submitting Author wishes to make the Work available on an Open Access basis (and intends to pay the relevant APC), the terms of reuse of such Open Access shall be governed by a Creative Commons licence – details of these licences and which [Creative Commons](#) licence will apply to this Work are set out in our licence referred to above.

Other than as permitted in any relevant BMJ Author's Self Archiving Policies, I confirm this Work has not been accepted for publication elsewhere, is not being considered for publication elsewhere and does not duplicate material already published. I confirm all authors consent to publication of this Work and authorise the granting of this licence.

# Association between serum uric acid and obesity in Chinese adults: A nine-year longitudinal data analysis

Jie Zeng<sup>1,2</sup>, Wayne R. Lawrence<sup>3</sup>, Jun Yang<sup>4</sup>, Junzhang Tian<sup>1</sup>, Cheng Li<sup>5</sup>, Wanmin Lian<sup>6</sup>, Jingjun He<sup>7</sup>, Hongying Qu<sup>1,7</sup>, Xiaojie Wang<sup>1</sup>, Hongmei Liu<sup>2,8</sup>, Guanming Li<sup>1\*</sup>, and Guowei Li<sup>1,9\*</sup>

<sup>1</sup> Center for Clinical Epidemiology and Methodology (CCEM), Guangdong Second Provincial General Hospital, Guangzhou, China.

<sup>2</sup> Institute of Ultrasound in Musculoskeletal Sports Medicine, Guangdong Second Provincial General Hospital, Guangzhou, China.

<sup>3</sup> Department of Epidemiology and Biostatistics, School of Public Health, University at Albany, State University of New York, One University Place, Rensselaer, New York.

<sup>4</sup> Institute for Environmental and Climate Research, Jinan University, Guangzhou, 511443, China.

<sup>5</sup> Guangdong Traditional Medical and Sports Injury Rehabilitation Research Institute, Guangdong Second Provincial General Hospital, Guangzhou, China.

<sup>6</sup> Center for Information, Guangdong Second Provincial General Hospital, Guangzhou, China.

<sup>7</sup> Center for Health Management and Examination, Guangdong Second Provincial General Hospital, Guangzhou, China.

<sup>8</sup> Department of Ultrasound, Guangdong Second Provincial General Hospital, Guangzhou, China.

<sup>9</sup> Department of Health Research Methods, Evidence, and Impact (HEI), McMaster University, Hamilton, ON, Canada.

## \*Corresponding Authors:

### **Guowei Li, PhD**

CCEM, Guangdong Second Provincial General Hospital, Guangzhou 510317, China.

Department of HEI, McMaster University, Hamilton, Canada L8S 4L8

Telephone: 86-020-89169025; Fax: 86-020-89168021

E-mail: liguowei099@126.com

and

### **Guanming Li, MD**

CCEM, Guangdong Second Provincial General Hospital, Guangzhou 510317, China.

Telephone: 86-020-32640264; Fax: 86-020-32640184



E-mail: lywergd@163.com

Word count: 2,953

For peer review only

1  
2  
3  
4  
5  
6  
7  
8  
9  
10  
11  
12  
13  
14  
15  
16  
17  
18  
19  
20  
21  
22  
23  
24  
25  
26  
27  
28  
29  
30  
31  
32  
33  
34  
35  
36  
37  
38  
39  
40  
41  
42  
43  
44  
45  
46  
47  
48  
49  
50  
51  
52  
53  
54  
55  
56  
57  
58  
59  
60

## 1 Abstract

2 **Objectives:** Hyperuricemia has been reported to be significantly associated with risk of obesity.  
3 However, previous studies on the association between serum uric acid (SUA) and body mass  
4 index (BMI) yielded conflicting results. The present study examined the relationship between  
5 SUA and obesity among Chinese adults.

6  
7 **Methods:** Data were collected at Guangdong Second Provincial General Hospital in Guangzhou  
8 City, China between January 2010 and December 2018. Participants with  $\geq 2$  medical checkup  
9 times were included in our analyses. Physical examinations and laboratory measurement variables  
10 were obtained from the medical checkup system. The high SUA level group was classified as  
11 participants with hyperuricemia, and obesity was defined as  $BMI \geq 28 \text{ kg/m}^2$ . Logistic regression  
12 model (LRM) was performed for data at baseline. For all participants, generalized estimation  
13 equation (GEE) model was used to assess the association between SUA and obesity, where the  
14 data were repeatedly measured over the nine-year study period. Subgroup analyses were  
15 performed by gender and age group. We calculated the cut-off values for SUA of obesity using the  
16 receiver operating characteristic curves (ROC) technique.

17  
18 **Results:** A total of 15,959 participants (10,023 males and 5,936 females) were included in this  
19 study, with an average age of 37.38 years (SD: 13.27) and average SUA of  $367.05 \mu\text{mol/L}$  (SD:  
20  $97.97$ ) at baseline, respectively. Finally, 1078 participants developed obesity over the 9-year  
21 period. The prevalence of obesity was approximately 14.2% for high SUA level. In logistic  
22 regression analysis at baseline, we observed a positive association between SUA and risk of  
23 obesity:  $OR=1.84$  (95% CI: 1.77,1.90) for per-SD increase in SUA. Considering repeated  
24 measures over 9-year for all participants in the GEE model, the per-SD OR was 1.85 (95%  
25 CI:1.77,1.91) for SUA and the increased risk of obesity were greater for male ( $OR=1.45$ ) and  
26 elderly participants ( $OR=1.01$ ). In subgroup analyses by gender and age, we observed significant  
27 associations between SUA and obesity with higher risk in female ( $OR=2.35$ ) and young

1  
2  
3  
4 28 participants (OR=1.87) when compared to male (OR=1.70) and elderly participants (OR=1.48).

5  
6 29 The SUA cut off points for risk of obesity using ROC curves were approximately consistent with  
7  
8 30 the international standard.  
9

10 31

11  
12  
13 32 **Conclusions:** Our study observed higher SUA level was associated with increased risk of obesity.

14  
15 33 More high-quality research is needed to further support these findings.  
16

17 34

18  
19  
20 35 **Keywords:** serum uric acid, obesity, generalized estimation equation model, risk factors, China  
21

22 36

23  
24  
25 37

26  
27  
28 38

29  
30  
31 39

32  
33 40

34  
35  
36 41

37  
38  
39 42

40  
41 43

42  
43  
44 44

45  
46  
47 45

48  
49 46

50  
51 47

52  
53 48

54  
55  
56  
57 49  
58  
59  
60

1  
2  
3  
4 50 **Strengths and limitations of this study**  
5

6 51 ➤ This is the first large long-term medical checkup study to explore the relationship between  
7  
8 52 SUA and obesity in China.  
9

10 53 ➤ The study analysis was based on the GEE model which can increase the accuracy of the  
11  
12 54 prediction.  
13

14  
15 55 ➤ The results from this study could inform prevention methods for obesity, especially in  
16  
17 56 medically underserved areas where medical service is insufficient.  
18

19  
20 57 ➤ The younger screening population in this study may underestimate the increased risk of uric  
21  
22 58 acid among the elderly obese.  
23

24  
25 59  
26

27  
28 60  
29  
30  
31  
32  
33  
34  
35  
36  
37  
38  
39  
40  
41  
42  
43  
44  
45  
46  
47  
48  
49  
50  
51  
52  
53  
54  
55  
56  
57  
58  
59  
60

## 61 Introduction

62 An individual's health behavior can influence both physical health and ability to recover from an  
63 illness. Annual medical checkup is an example of a positive health behavior, as this preventative  
64 measure is associated with earlier disease detection, greater treatment success, and faster recovery  
65 from a disease <sup>1</sup>. For this reason, medical data obtained from primary care is a useful source as it  
66 includes information on symptoms and healthcare utilization, all beneficial for use in prediction  
67 analysis. Medical checkup data often includes a variety of diagnostic tests to assess health status  
68 for early detection and disease prevention. Additionally, medical checkup data provides valuable  
69 information on present and past health conditions that are generally difficult to obtain in most  
70 population-based data <sup>2</sup>. More specifically, medical checkup data is a reliable and objective  
71 measure for identifying chronic diseases such as hyperuricemia and obesity.

72  
73 Serum uric acid (SUA) is the final product of purine metabolism in humans, potentially resulting  
74 in hyperuricemia <sup>3,4</sup>. In China, the prevalence of hyperuricemia is 13.3%, with 19.4% for men and  
75 7.9% for women <sup>5</sup>. Additionally, in 2019 the obesity prevalence was nearing 12% in China.  
76 Among obese patients, hyperuricemia is commonly observed. Although changes in obesity was  
77 reported to be independently correlated with changes in uric acid concentration, there might be an  
78 interaction between them as suggested in prior pathophysiological and metabolic studies <sup>6</sup>.  
79 Epidemiological and clinical evidence supports a strong significant positive association between  
80 SUA and obesity in the adult population of China, Japan, India, Pakistan, and Iraq <sup>7</sup>. A cross-  
81 sectional study showed that body mass index (BMI) significantly increases with elevated SUA  
82 among 27,009 middle-aged and elderly Chinese adults <sup>8</sup>. Previous research showed that  
83 hyperuricemia can cause obesity by accelerating hepatic and peripheral lipogenesis <sup>9</sup>. With the  
84 increasing prevalence of obesity among adults with hyperuricemia, it is of public health  
85 importance to evaluate the long-term epidemiological transitions to develop policies centered on  
86 intervention.

87

1  
2  
3  
4 88 Numerous trend analyses have reported the association between SUA and BMI based on short-  
5  
6 89 term survey data in China <sup>10, 11</sup>. However, there remains a gap in evidence regarding the long-term  
7  
8 90 trend for providing estimates on the risks of obesity among Chinese adults during the last two  
9  
10 91 decades. Therefore, the present study aimed to examine the relationship between SUA and risk of  
11  
12 92 obesity using the 9-year medical checkup data among Chinese adults from 2010 to 2018.  
13  
14 93

## 16 94 **Methods**

### 17 95 **Study design and subjects**

18  
19  
20  
21  
22 96 We conducted a large retrospective study in China. Medical examinations were performed in 2010  
23  
24 97 and 2018 at the Guangdong Second Provincial General Hospital in Guangzhou City, China  
25  
26 98 (**Figure 1**). Individuals were excluded from the study due to having (1) less than two medical  
27  
28 99 checkups; (2) absence of blood biochemical examination; and (3) no documented information on  
29  
30 100 BMI. Thus, a total of 15,959 participants were included in the study analysis (**Figure 2**).  
31  
32 101  
33  
34

### 35 102 **Measurements**

36  
37 103 All participants were invited to join an in-person evaluation that included physical examination  
38  
39 104 and laboratory testing. Physical examinations were conducted following a standardized protocol,  
40  
41 105 including weight, height, waist circumference, hip circumference, and blood pressure. Waist  
42  
43 106 circumference was measured around the midway between the lowest border of the ribs and iliac  
44  
45 107 crest in the horizontal plane. The quality of anthropometric data was confirmed by repeated  
46  
47 108 measurements in the presence of researchers. Laboratory measurements were obtained to measure  
48  
49 109 SUA, systolic blood pressure (SBP), diastolic blood pressure (DBP), total cholesterol (TC),  
50  
51 110 triglycerides (TG), fasting plasma glucose (FPG), high-density lipoprotein cholesterol (HDL-C),  
52  
53 111 low-density lipoprotein cholesterol (LDL-C), creatinine (Cr) and blood urea nitrogen (BUN).  
54  
55  
56 112

### 57 113 **Outcomes and definitions**

1  
2  
3  
4 114 Hyperuricemia was defined as having SUA concentrations  $>7.0$  mg/dL ( $416.4\mu\text{mol/L}$ ) in men  
5  
6 115 or  $>6.0$  mg/dL ( $356.9\mu\text{mol/L}$ ) in women<sup>12, 13</sup>. SUA levels were categorized into two groups  
7  
8 116 (normal and high SUA) to compare the prevalence of obesity and its association with SUA. The  
9  
10 117 high SUA level group was classified as participants with hyperuricemia. BMI was defined as  
11  
12 118 weight divided by height<sup>2</sup> ( $\text{kg/m}^2$ ) and categorized into two groups (non-obese [ $< 28 \text{ kg/m}^2$ ] and  
13  
14 119 obese [ $\geq 28 \text{ kg/m}^2$ ]) based on the Asia-Pacific criteria set by the World Health Organization<sup>14, 15</sup>.  
15  
16 120 We excluded patients taken drugs that might affect uric acid metabolism, such as losartan,  
17  
18 121 furosemide, and allopurinol.

### 122 123 **Statistical analysis**

124 We conducted descriptive analysis to present the characteristics of baseline participants.  
125 Continuous variables were reported as mean  $\pm$  standard deviation (SD) and categorical variables  
126 as frequency and percentage, unless otherwise specified. Comparisons between two groups (obese  
127 and non-obese) were performed using Student's t-tests for continuous variables and Chi-  
128 square analyses for categorical variables. Logistic regression model (LRM) was used to evaluate  
129 the relationship between risk of obesity and risk factors for the data at baseline. We also utilized  
130 generalized estimating equations (GEE) models with unstructured correlation structures to  
131 quantify their longitudinal association between SUA and risk of obesity<sup>16</sup>, given the data on SUA  
132 and obesity were repeatedly measured over the 9-year study period. All models were adjusted for  
133 age, gender, SBP, DBP, TC, TG, HDL-c, LDL-c, FPG, BUN, and CR in each group. Results were  
134 presented as odds ratio (OR) and 95% confidence interval (CI) with per-1  $\mu\text{mol/L}$  or per-SD  
135 increase in SUA.

136  
137 We performed subgroup analyses using GEE models by: 1) gender (male vs female); and 2) age  
138 group (youth  $<65$  years vs. elderly  $\geq 65$  years). Additionally, we calculated the cut-off values of  
139 SUA for risk of obesity using the receiver operating characteristic (ROC) curves, based on criteria  
140 including (1) the point on the curve with minimum distance from the left-upper corner of the unit

1  
2  
3  
4 141 square; and (2) the point where the Youden's index is maximum<sup>17</sup>. A two-sided p-value less than  
5  
6 142 0.05 was considered as the statistically significant. Analyses were performed using R version 3.5.3  
7  
8 143 (R Foundation for Statistical Computing, Vienna, Austria).

9  
10 144

### 11 12 13 145 **Patient and public involvement**

14  
15 146 There were no patient and/or public involvement in the design of this study. The IRB approved the  
16  
17 147 ethical waiver of informed consent for this study.

18  
19  
20 148

### 21 22 23 149 **Results**

24  
25 150 There were 15,959 participants (10,023 males) included in this study. The average number of  
26  
27 151 health checkup for each participant was 2.62. Participants had a mean age of 37.38 years (SD:  
28  
29 152 13.27) and a mean SUA of 367.05  $\mu\text{mol/L}$  (SD: 97.97) at baseline, respectively. There were 1,227  
30  
31 153 (7.6%) participants that were obese at baseline. Significant differences between the obese and  
32  
33 154 non-obese groups were observed for SUA, age, gender, SBP, DBP, TC, TG, HDL-c, LDL-c, FPG,  
34  
35 155 BUN, and CR (p-value < 0.001) (**Table 1**). In total, the prevalence of obesity was approximately  
36  
37 156 14.2% for high SUA level. Obesity prevalence significantly increased with elevating SUA in the  
38  
39 157 subgroup analysis by gender and age group (p-value < 0.001). The prevalence was higher in males  
40  
41 158 than females. However, the prevalence had no obvious trend for by age groups (**Table 2**). The  
42  
43 159 prevalence of obesity significantly increased with the number of medical checkup years in the  
44  
45 160 group with high SUA and normal SUA levels (p<0.001 for trend) (**Figure 1**). Finally, 1078  
46  
47 161 participants developed obesity over the 9-year period.

48  
49  
50 162

51  
52 163 As presented in **Table 3**, we observed at baseline significant differences on risk of obesity for  
53  
54 164 SUA [per-1 OR=1.01 (95% CI: 1.01,1.02)] or [per-SD OR=1.84 (95% CI: 1.77,1.90)], age  
55  
56 165 [OR=1.02 (95% CI:1.02,1.03)], and male gender [OR=1.27 (95% CI:1.16,1.39)] in the logistic  
57  
58 166 regression analysis (Model 1). When converted to categorical analysis, the risks of obesity were



1  
2  
3  
4 167 greater among those with high level of SUA, males and younger participants. Likewise, with  
5  
6 168 longitudinal data on the repeated medical checkups in the multivariable GEE model (Model 2),  
7  
8 169 consistent risk factors for obesity were obtained. The estimates were observed as follows: [per-1  
9  
10 170 OR= 1.01 (95% CI: 1.01,1.02)] or [per-SD OR=1.85 (95% CI: 1.77,1.91)] for SUA, OR=1.45  
11  
12 171 (95% CI: 1.32,1.60) for male, and OR =1.01 (1.01, 1.02) for age. In additional analysis by  
13  
14 172 categorical variables, we observed similar results with higher risk in male and elderly participants.

15  
16 173

17  
18 174 As showed in **Table 4**, similar results for GEE model analyses were observed in subgroup  
19  
20 175 analyses. Significant associations between SUA and risk of obesity were observed, where female  
21  
22 176 [per-SD OR=2.35 (2.16,2.55)] and young participants [per-SD OR=1.87 (1.80,1.94)] had an  
23  
24 177 elevated risk. To calculate the discrimination ability of SUA among obese participants at different  
25  
26 178 times of medical checkup (1 to 8) or different years of medical checkup (2010 to 2018), ROC  
27  
28 179 curves were calculated. **SFigure 1** and **SFigure 2** summarizes the cut-off values and the area  
29  
30 180 under receiver operating curves (AUCs) of SUA in obesity participants stratified by gender. We  
31  
32 181 found that the overall cut-off values of SUA were 429.5 $\mu$ mol/L (range: 411.5-488.5  $\mu$ mol/L) in  
33  
34 182 males and 326.9 $\mu$ mol/L (range: 298.5-426.5  $\mu$ mol/L) in females when stratified by different times  
35  
36 183 of medical checkups. Similarly, we calculated the overall cut-off values for SUA, which were  
37  
38 184 429.5  $\mu$ mol/L (range: 366.7-431.5  $\mu$ mol/L) in males and 326.9  $\mu$ mol/L (range: 301.5-362.1  
39  
40 185  $\mu$ mol/L) in females when stratified by different years of medical checkups.

41  
42 186

## 43 44 45 187 **Discussion**

46  
47  
48 188 To the best of our knowledge, this is the first longitudinal study that estimated the relationship  
49  
50 189 between SUA and obesity over a long time period in China. The prevalence of obesity was  
51  
52 190 approximately 14.2% for high SUA level. Previous studies found that the prevalence of  
53  
54 191 hyperuricemia ranged from 2.5 to 25 % depending on the study population country<sup>18</sup>. For  
55  
56 192 instance, the prevalence rates were reported to be 5 % in the Caucasus and 24.4 % in Thailand<sup>19</sup>,  
57  
58 193 <sup>20</sup>. Overall, we found high SUA level was associated with increased risk of obesity, within OR

1  
2  
3  
4 194 value of 1.85 (1.77,1.91) in the GEE model for all participants, which was nearly consistent with  
5  
6 195 prior studies <sup>21,22</sup>. Currently, obesity and hyperuricemia, as well as their associated health  
7  
8 196 complications (e.g. metabolic syndrome) have emerged as a major public health concern as a  
9  
10 197 result of the growing prevalence, and the estimated economic burden <sup>7</sup>.

11  
12 198

13  
14  
15 199 Several recent studies have investigated the mechanism of SUA on increasing the risk of obesity,  
16  
17 200 suggesting the influence of overproduction and poor renal excretion <sup>23</sup>. Prior studies reported that  
18  
19 201 increased SUA level is closely related to excessive production of UA and the reduction of urinary  
20  
21 202 uric acid excretion and clearance <sup>24</sup>. This ultimately leads to increased risk of patients with  
22  
23 203 visceral fatty obesity <sup>23</sup>. Visceral fat accumulation (VFA) results in a large influx of plasma free  
24  
25 204 fatty acids into the portal vein and liver. This stimulates the synthesis of triglycerides and  
26  
27 205 subsequently produced large amounts of UA through the activated UA synthesis pathway <sup>25,26</sup>.  
28  
29 206 Additionally, many researchers have reported a significant correlation between VFA and BMI <sup>27</sup>,  
30  
31 207 <sup>28</sup>. Therefore, because of the close biological relationship between UA and BMI, it is of great  
32  
33 208 importance for preventive medicine to pay attention to the interaction between UA and BMI.

34  
35 209

36  
37  
38 210 Conflicting results regarding gender and age differences for the association between SUA and  
39  
40 211 obesity have been reported <sup>10,29</sup>. Our study found significant differences in obesity participants  
41  
42 212 with elevated OR value among high SUA level, male, and elderly for all medical checkup  
43  
44 213 participants. A similar study reported a positive relationship between BMI and SUA levels among  
45  
46 214 healthy individuals in China <sup>30</sup>. Nevertheless, in this study the subgroup analyses showed that  
47  
48 215 significant associated risk between SUA and obesity were observed higher in female and young  
49  
50 216 participants. This is consistent with a Thailand study that reported high SUA concentrations were  
51  
52 217 associated with greater risk of obesity in females <sup>31</sup>. However, study in Bangladesh and Japan  
53  
54 218 reported that elevated SUA predicted obesity higher in males and the elderly<sup>8,29,31</sup>. Perhaps the  
55  
56 219 associations of SUA with obesity varies by populations. Moreover, in a 10-year follow-up study,  
57  
58 220 BMI was observed to significantly increase with higher SUA levels regardless of race and gender

1  
2  
3  
4 221 <sup>32</sup>. Therefore, greater attention should be provided to those vulnerable populations in clinical  
5  
6 222 guidelines.  
7

8  
9 223

10  
11 224 An important observation was that association between SUA and risk of obesity in the LRM  
12  
13 225 [OR=1.84 (1.77,1.90)] for data at baseline was nearly consistent with the analyses in the GEE  
14  
15 226 model [OR= (1.85 (1.77,1.91))] for 9-year all participants. The risk of obesity within  
16  
17 227 hyperuricemia remained stable over the years. Therefore, short-term medical checkup results can  
18  
19 228 reflect the development of chronic diseases <sup>33</sup>. Regarding the assessment of cut-off values from  
20  
21 229 ROC of SUA in obesity participants, the cut-off values of SUA were 429.5 $\mu$ mol/L in males and  
22  
23 230 326.9 $\mu$ mol/L in females in stratified analysis by times or years of medical checkup. The cut-off  
24  
25 231 value was approximately consistent with the international standard for males <sup>34</sup>. However, it was  
26  
27 232 underestimated for women in the group of obese participants. Perhaps the proportion of females  
28  
29 233 were fewer in this study. The cut-off values for SUA in the study may be useful for distinguishing  
30  
31 234 tests among obesity and non-obesity participants, which were significant for certain risk value  
32  
33 235 prediction and guidance<sup>35</sup>.

34  
35 236

36  
37 237 We must note several limitations in the present study. First, the underlying mechanism by which  
38  
39 238 SUA is increased in obese individuals remains not well understood. Second, this study did not  
40  
41 239 collect information on whether participants were prescribed medication to treat hyperuricemia.  
42  
43 240 Additionally, some medications used to treat hypertension may increase uric acid levels. Third,  
44  
45 241 there are numerous confounding factors that have not been considered, which can be studied  
46  
47 242 together with questionnaires in the future. Moreover, the younger screening population in this  
48  
49 243 study may underestimate the increased risk of uric acid among the elderly obese.

50  
51  
52 244

53  
54 245 The present study has several strengths that must be noted. First, to our knowledge this is the first  
55  
56 246 large long-term medical checkup study to explore the relationship between SUA and obesity in  
57  
58 247 China. Second, the study analysis was based on the GEE model with high quality data by

1  
2  
3  
4 248 controlling for confounding factors, which can increase the accuracy of the prediction. Third,  
5  
6 249 participants were representative of the general population with regard to clinical checkup and  
7  
8 250 obesity status, enhancing the generalizability of our findings. Moreover, results from this study  
9  
10 251 could inform prevention methods for obesity, especially in medically underserved areas where  
11  
12 252 medical service is insufficient.

13  
14 253

15  
16 254 This study filled current gaps in literature by analyzing the relationship between SUA and obesity  
17  
18 255 using medical checkup data. We observed that medical checkup data can be used to improve the  
19  
20 256 risk of obesity prediction accuracy. The medical checkup data used in this study can help provide  
21  
22 257 information that will facilitate intervention development and adoption at the individual level<sup>36</sup>. The  
23  
24 258 utility of medical checkup data can potentially reach beyond predictive power alone in the near  
25  
26 259 future.

27  
28  
29 260

## 30 31 261 **Conclusions**

32  
33  
34 262 In conclusion, our study observed significant associations between SUA and obesity in this 9-year  
35  
36 263 longitudinal study. We mainly found higher SUA level was associated with increased risk of  
37  
38 264 obesity. The prevalence of obesity was approximately 14.2% and significantly increased with the  
39  
40 265 number of medical checkup years in the group with high level of SUA. Additionally, the increased  
41  
42 266 risk of obesity was greater for high SUA level, male, and elderly participants. Subgroup analyses  
43  
44 267 revealed significant associations between SUA and obesity with higher risk for females and young  
45  
46 268 participants. Additionally, the cut-off for SUA on risk of obesity were approximately consistent  
47  
48 269 with the international standard. More evidence from well-designed studies are needed to confirm  
49  
50 270 our findings.

**Author Contributions:**

Guowei Li, Jie Zeng, Guanming Li: conceived and designed the study.

Guowei Li, Jie Zeng, Wayne R. Lawrence, Jun Yang: acquired data, performed statistical analyses and interpretation, and drafted the manuscript.

Junzhang Tian, Cheng Li, Wanmin Lian, Jingjun He, Hongying Qu, Xiaojie Wang, Hongmei Liu: provided professional and statistical support, and made several critical revisions to the manuscript.

All authors read and approved the final manuscript.

**Acknowledgments:** None declared.

**Competing interests:** None declared.

**Funding:** Research grants from the Science Foundation of Guangdong Second Provincial General Hospital (YQ2019-008).

**Patient consent for publication:** Not required.

**Data availability statement:** All data relevant to the study are included in the article or uploaded as supplementary information.

## Reference

1. Nagahama S, Kashino I, Hu H, Nanri A, Kurotani K, Kuwahara K *et al.* Haemoglobin A1c and hearing impairment: longitudinal analysis using a large occupational health check-up data of Japan. *BMJ open* 2018; **8**(9): e023220.
2. Kim YJ, Park H. Improving Prediction of High-Cost Health Care Users with Medical Check-Up Data. *Big data* 2019; **7**(3): 163-175.
3. Global Burden of Disease Study C. Global, regional, and national incidence, prevalence, and years lived with disability for 301 acute and chronic diseases and injuries in 188 countries, 1990-2013: a systematic analysis for the Global Burden of Disease Study 2013. *Lancet* 2015; **386**(9995): 743-800.
4. Ng M, Fleming T, Robinson M, Thomson B, Graetz N, Margono C *et al.* Global, regional, and national prevalence of overweight and obesity in children and adults during 1980-2013: a systematic analysis for the Global Burden of Disease Study 2013. *Lancet* 2014; **384**(9945): 766-81.
5. Liu R, Han C, Wu D, Xia X, Gu J, Guan H *et al.* Prevalence of Hyperuricemia and Gout in Mainland China from 2000 to 2014: A Systematic Review and Meta-Analysis. *BioMed research international* 2015; **2015**: 762820.
6. Ishizaka N, Ishizaka Y, Toda A, Tani M, Koike K, Yamakado M *et al.* Changes in waist circumference and body mass index in relation to changes in serum uric acid in Japanese individuals. *The Journal of rheumatology* 2010; **37**(2): 410-6.
7. Chen MY, Zhao CC, Li TT, Zhu Y, Yu TP, Bao YQ *et al.* Serum uric acid levels are associated with obesity but not cardio-cerebrovascular events in Chinese inpatients with type 2 diabetes. *Scientific reports* 2017; **7**: 40009.
8. Dai X, Yuan J, Yao P, Yang B, Gui L, Zhang X *et al.* Association between serum uric acid and the metabolic syndrome among a middle- and old-age Chinese population. *European journal of epidemiology* 2013; **28**(8): 669-76.
9. Johnson RJ, Lanaspas MA, Gaucher EA. Uric acid: a danger signal from the RNA world that may have a role in the epidemic of obesity, metabolic syndrome, and cardiorenal disease: evolutionary considerations. *Seminars in nephrology* 2011; **31**(5): 394-9.
10. Ali N, Perveen R, Rahman S, Mahmood S, Rahman S, Islam S. Prevalence of hyperuricemia and the relationship between serum uric acid and obesity: A study on Bangladeshi adults. 2018; **13**(11): e0206850.
11. Yang C, Yang S, Feng C, Zhang C, Xu W, Zhang L *et al.* Associations of hyperuricemia and obesity with remission of nonalcoholic fatty liver disease among Chinese men: A retrospective cohort study. *PloS one* 2018; **13**(2): e0192396.
12. Sui X, Church TS, Meriwether RA, Lobelo F, Blair SN. Uric acid and the development of metabolic

- 1  
2  
3 syndrome in women and men. *Metabolism: clinical and experimental* 2008; **57**(6): 845-52.  
4  
5  
6 13. You L, Liu A, Wuyun G, Wu H, Wang P. Prevalence of hyperuricemia and the relationship  
7 between serum uric acid and metabolic syndrome in the Asian Mongolian area. *Journal of*  
8 *atherosclerosis and thrombosis* 2014; **21**(4): 355-65.  
9  
10 14. WHO. Appropriate body-mass index for Asian populations and its implications for policy and  
11 intervention strategies. *Lancet* 2004; **363**(9403): 157-63.  
12  
13 15. Li MF, Ren Y, Zhao CC, Zhang R, Li LX, Liu F *et al*. Prevalence and clinical characteristics of  
14 lower limb atherosclerotic lesions in newly diagnosed patients with ketosis-onset diabetes: a  
15 cross-sectional study. *Diabetology & metabolic syndrome* 2014; **6**: 71.  
16  
17 16. Buzkova P, Brown ER, John-Stewart GC. Longitudinal data analysis for generalized linear  
18 models under participant-driven informative follow-up: an application in maternal health  
19 epidemiology. *American journal of epidemiology* 2010; **171**(2): 189-97.  
20  
21 17. Habibzadeh F, Habibzadeh P, Yadollahie M. On determining the most appropriate test cut-off  
22 value: the case of tests with continuous results. *Biochemia medica* 2016; **26**(3): 297-307.  
23  
24 18. Remedios C, Shah M, Bhasker AG, Lakdawala M. Hyperuricemia: a reality in the Indian obese.  
25 *Obesity surgery* 2012; **22**(6): 945-8.  
26  
27 19. Uaratanawong S, Suraamornkul S, Angkeaw S, Uaratanawong R. Prevalence of hyperuricemia  
28 in Bangkok population. *Clinical rheumatology* 2011; **30**(7): 887-93.  
29  
30 20. Ford DK, Demos AM. Serum Uric Acid Levels of Healthy Caucasian, Chinese and Haida Indian  
31 Males in British Columbia. *Canadian Medical Association journal* 1964; **90**: 1295-7.  
32  
33 21. Kuwabara M, Kuwabara R, Hisatome I, Niwa K, Roncal-Jimenez CA, Bjornstad P *et al*.  
34 "Metabolically Healthy" Obesity and Hyperuricemia Increase Risk for Hypertension and  
35 Diabetes: 5-year Japanese Cohort Study. *Obesity* 2017; **25**(11): 1997-2008.  
36  
37 22. Zhang N, Chang Y, Guo X, Chen Y, Ye N, Sun Y. A Body Shape Index and Body Roundness  
38 Index: Two new body indices for detecting association between obesity and hyperuricemia in  
39 rural area of China. *European journal of internal medicine* 2016; **29**: 32-6.  
40  
41 23. Matsuura F, Yamashita S, Nakamura T, Nishida M, Nozaki S, Funahashi T *et al*. Effect of  
42 visceral fat accumulation on uric acid metabolism in male obese subjects: visceral fat obesity  
43 is linked more closely to overproduction of uric acid than subcutaneous fat obesity.  
44 *Metabolism: clinical and experimental* 1998; **47**(8): 929-33.  
45  
46 24. Han T, Meng X, Shan R, Zi T, Li Y, Ma H *et al*. Temporal relationship between hyperuricemia  
47 and obesity, and its association with future risk of type 2 diabetes. *International journal of*  
48 *obesity (2005)* 2018; **42**(7): 1336-1344.  
49  
50 25. Fabregat I, Revilla E, Machado A. Short-term control of the pentose phosphate cycle by  
51 insulin could be modulated by the NADPH/NADP ratio in rat adipocytes and hepatocytes.  
52 *Biochemical and biophysical research communications* 1987; **146**(2): 920-5.  
53  
54  
55  
56  
57  
58  
59  
60

- 1  
2  
3  
4  
5  
6  
7  
8  
9  
10  
11  
12  
13  
14  
15  
16  
17  
18  
19  
20  
21  
22  
23  
24  
25  
26  
27  
28  
29  
30  
31  
32  
33  
34  
35  
36  
37  
38  
39  
40  
41  
42  
43  
44  
45  
46  
47  
48  
49  
50  
51  
52  
53  
54  
55  
56  
57  
58  
59  
60
26. Fox IH. Metabolic basis for disorders of purine nucleotide degradation. *Metabolism: clinical and experimental* 1981; **30**(6): 616-34.
  27. Examination Committee of Criteria for 'Obesity Disease' in J, Japan Society for the Study of O. New criteria for 'obesity disease' in Japan. *Circulation journal : official journal of the Japanese Circulation Society* 2002; **66**(11): 987-92.
  28. Oka R, Miura K, Sakurai M, Nakamura K, Yagi K, Miyamoto S *et al*. Comparison of waist circumference with body mass index for predicting abdominal adipose tissue. *Diabetes research and clinical practice* 2009; **83**(1): 100-5.
  29. Tanaka K, Ogata S, Tanaka H, Omura K, Honda C, Hayakawa K. The relationship between body mass index and uric acid: a study on Japanese adult twins. *Environmental health and preventive medicine* 2015; **20**(5): 347-53.
  30. Wang H, Wang L, Xie R, Dai W, Gao C, Shen P *et al*. Association of Serum Uric Acid with Body Mass Index: A Cross-Sectional Study from Jiangsu Province, China. *Iranian journal of public health* 2014; **43**(11): 1503-9.
  31. Jaipakdee J, Jiamjarasrangsri W, Lohsoonthorn V, Lertmaharit S. Prevalence of metabolic syndrome and its association with serum uric acid levels in Bangkok Thailand. *The Southeast Asian journal of tropical medicine and public health* 2013; **44**(3): 512-22.
  32. Rathmann W, Haastert B, Icks A, Giani G, Roseman JM. Ten-year change in serum uric acid and its relation to changes in other metabolic risk factors in young black and white adults: the CARDIA study. *European journal of epidemiology* 2007; **22**(7): 439-45.
  33. Nohara Y, Kai E. Health checkup and telemedical intervention program for preventive medicine in developing countries: verification study. 2015; **17**(1): e2.
  34. Bardin T, Richette P. Definition of hyperuricemia and gouty conditions. *Current opinion in rheumatology* 2014; **26**(2): 186-91.
  35. Mongioi LM, Condorelli RA, Barbagallo F, Cannarella R, La Vignera S, Calogero AE. Accuracy of the Low-Dose ACTH Stimulation Test for Adrenal Insufficiency Diagnosis: A Re-Assessment of the Cut-Off Value. *Journal of clinical medicine* 2019; **8**(6).
  36. Taninaga J, Nishiyama Y. Prediction of future gastric cancer risk using a machine learning algorithm and comprehensive medical check-up data: A case-control study. 2019; **9**(1): 12384.



1  
2  
3  
4 **Tables and Figure legends:**

5 **Table 1.** Baseline characteristics and comparison between obesity and non-obesity participants.  
6  
7

8  
9 **Table 2.** The prevalence of obesity by gender, age of checkup stratified by baseline SUA.  
10  
11

12  
13 **Table 3.** Relationship between risk factors and risk of obesity in the models.  
14  
15

16 **Table 4.** Relationship between risk factors and risk of obesity in the models stratified by gender  
17 and age group.  
18  
19

20  
21  
22 **Figure 1.** Location of Guangdong Second Provincial General Hospital (Guangzhou,  
23 Guangdong, China) and the prevalence of obesity by different years stratified by baseline SUA.  
24  
25

26  
27 **Figure 2.** Flow diagram showing selection process of participants in our study.  
28  
29

30  
31  
32  
33  
34 **Supplemental data:**

35  
36  
37 **Supplementary Figure 1.** The ROC curves showing the relationship between SUA and risk of  
38 obesity stratified by gender and different times of medical checkups.  
39  
40

41  
42 **Supplementary Figure 2.** The ROC curves showing the relationship between SUA and risk of  
43 obesity stratified by gender and different years of medical checkups (from 2010 to 2018).  
44  
45  
46  
47  
48  
49  
50  
51  
52  
53  
54

55  
56 **Table 1.** Baseline characteristics and comparison between obesity and non-obesity participants.  
57  
58  
59  
60

| Characteristics     | All patients   | Obesity <sup>a</sup> | Non-obesity    | <i>p</i> -value <sup>b</sup> |
|---------------------|----------------|----------------------|----------------|------------------------------|
|                     | n=15959        | n=1227               | n=14732        |                              |
| SUA (μmol/L) [SD]   | 367.05 (97.97) | 434.95 (97.65)       | 361.32 (95.82) | <0.001                       |
| Age (years) [SD]    | 37.38 (13.27)  | 40.40 (13.40)        | 37.13 (13.23)  | <0.001                       |
| Male [n, (%)]       | 10023 (62.8)   | 1012 (82.5)          | 9011 (61.2)    | <0.001                       |
| SBP (mmHg) [SD]     | 121.09 (15.85) | 131.78 (16.47)       | 120.19 (15.47) | <0.001                       |
| DBP (mmHg) [SD]     | 73.84 (10.31)  | 81.16 (11.41)        | 73.23 (9.97)   | <0.001                       |
| TC (mmol/L) [SD]    | 4.88 (0.93)    | 5.19 (0.95)          | 4.86 (0.93)    | <0.001                       |
| TG (mmol/L) [SD]    | 1.46 (1.10)    | 2.18 (1.49)          | 1.40 (1.04)    | <0.001                       |
| HDL-c (mmol/L) [SD] | 1.26 (0.25)    | 1.15 (0.22)          | 1.27 (0.25)    | <0.001                       |
| LDL-c (mmol/L) [SD] | 2.92 (0.78)    | 3.20 (0.80)          | 2.90 (0.77)    | <0.001                       |
| FPG (mmol/L) [SD]   | 5.06 (1.04)    | 5.51 (1.61)          | 5.03 (0.97)    | <0.001                       |
| BUN (mmol/L) [SD]   | 4.78 (1.25)    | 5.07 (1.30)          | 4.75 (1.24)    | <0.001                       |
| CR (mmol/L) [SD]    | 94.57 (17.12)  | 100.05 (16.17)       | 94.11 (17.12)  | <0.001                       |

**Note:** Continuous variables are presented as the means (standard derivation); SUA, serum uric acid; SBP, systolic blood pressure; DBP, diastolic blood pressure; TC, total cholesterol; TG, triglycerides; HDL-c, high-density lipoprotein cholesterol; LDL-c, low-density lipoprotein cholesterol; FPG, fasting plasma glucose; BUN, blood urea nitrogen; Cr, creatinine.

<sup>a</sup> Obesity was defined as body mass index (BMI)  $\geq 28.0$  kg/m<sup>2</sup>.

<sup>b</sup> *p* value for the difference of variables between the two datasets based on independent sample t-test or chi-square test.

\*The average number of health checkup for each participant is 2.62.

**Table 2.** The prevalence of obesity by gender, age of checkup stratified by baseline SUA.

| Variable         | Obesity prevalence, n (%) <sup>a</sup> |                 |         |
|------------------|----------------------------------------|-----------------|---------|
|                  | Normal SUA                             | High SUA        | P-value |
| <b>Gender</b>    |                                        |                 |         |
| Male             | 357/5280 (6.8)                         | 570/3768 (15.1) | <0.001  |
| Female           | 104/4431 (2.3)                         | 97/937 (10.3)   | <0.001  |
| <b>Age group</b> |                                        |                 |         |
| <30              | 88/3509 (2.5)                          | 168/1643 (10.2) | <0.001  |
| 30-44            | 182/3736 (4.9)                         | 309/1692 (18.3) | <0.001  |
| 45-59            | 121/1727 (7.0)                         | 125/865 (14.5)  | <0.001  |
| 60-74            | 54/606 (8.9)                           | 53/378 (14.0)   | <0.001  |
| ≥75              | 11/134 (8.2)                           | 12/127 (9.4)    | <0.001  |
| <b>Overall</b>   | 456/9711 (4.6)                         | 669/4705 (14.2) | <0.001  |

**Note:** High SUA level was defined as the SUA greater than 420 mmol/L in men and greater than 360 mmol/L in women, while the others are normal.

<sup>a</sup>Obesity prevalence = (n of obesity) / (total participants).

**Table 3.** Relationship between risk factors and risk of obesity in the models.

| Variable                    | Model 1 <sup>c</sup>                      |                | Model 2 <sup>d</sup>                      |                |
|-----------------------------|-------------------------------------------|----------------|-------------------------------------------|----------------|
|                             | <i>OR<sup>a</sup> (95%CI<sup>b</sup>)</i> | <i>p-value</i> | <i>OR<sup>a</sup> (95%CI<sup>b</sup>)</i> | <i>p-value</i> |
| <b>Continuous analysis</b>  |                                           |                |                                           |                |
| <b>SUA (μmol/L)</b>         |                                           |                |                                           |                |
| Per-1                       | 1.01 (1.01,1.02)                          | <0.001         | 1.01 (1.01,1.02)                          | <0.001         |
| Per-SD                      | 1.84 (1.77,1.90)                          | <0.001         | 1.85 (1.77,1.91)                          | <0.001         |
| <b>Gender [n, (%)]</b>      |                                           |                |                                           |                |
| Female                      | Reference                                 |                | Reference                                 |                |
| Male                        | 1.27 (1.16,1.39)                          | <0.001         | 1.45 (1.32,1.60)                          | <0.001         |
| Age (years)                 | 1.02 (1.02, 1.03)                         | <0.001         | 1.01 (1.01, 1.02)                         | <0.001         |
| <b>Categorical analysis</b> |                                           |                |                                           |                |
| <b>SUA<sup>e</sup></b>      |                                           |                |                                           |                |
| Normal SUA                  | Reference                                 |                | Reference                                 |                |
| High SUA                    | 2.02 (1.84, 2.23)                         | <0.001         | 2.57 (2.31, 2.87)                         | <0.001         |
| <b>Gender</b>               |                                           |                |                                           |                |
| Female                      | Reference                                 |                | Reference                                 |                |
| Male                        | 1.25 (1.09, 1.43)                         | 0.002          | 1.69 (1.59, 1.79)                         | <0.001         |
| <b>Age group</b>            |                                           |                |                                           |                |
| <30                         | Reference                                 |                | Reference                                 |                |
| 30-44                       | 1.38 (1.14, 1.66)                         | 0.001          | 1.73 (1.54, 1.91)                         | <0.001         |
| 45-59                       | 1.07 (0.89, 1.30)                         | 0.475          | 1.94 (1.72, 2.18)                         | <0.001         |
| 60-74                       | 1.12 (0.90, 1.38)                         | 0.314          | 1.99 (1.72, 2.32)                         | <0.001         |
| ≥75                         | 0.95 (0.71, 1.27)                         | 0.718          | 1.86(1.50, 2.31)                          | <0.001         |

**Note:** <sup>a</sup>OR: odds ratio; <sup>b</sup>CI: confidence interval.

<sup>c</sup>Model 1 was adjusted for the variables of SBP, DBP, TC, TG, HDL-c, LDL-c, FPG, BUN, CR based on the first time of medical checkup participants by using multivariate logistic regression model (LRM).

<sup>d</sup>Model 2 was adjusted for the variables of repeated times or years of medical checkup, SBP, DBP, TC, TG, HDL-c, LDL-c, FPG, BUN, CR based on all medical checkup participants by using generalized estimation equation model (GEE).

<sup>e</sup>High SUA level was defined as the SUA greater than 420 mmol/L in men and greater than 360 mmol/L in women, while the others are normal.

**Table 4.** Relationship between risk factors and risk of obesity in the models stratified by gender and age group.

| Variable                     | Generalized estimation equation model (GEE) <sup>c</sup> |                           |                                           |                |
|------------------------------|----------------------------------------------------------|---------------------------|-------------------------------------------|----------------|
|                              | Male                                                     |                           | Female                                    |                |
| Gender                       | <i>OR<sup>a</sup> (95%CI<sup>b</sup>)</i>                | <i>p-value</i>            | <i>OR<sup>a</sup> (95%CI<sup>b</sup>)</i> | <i>p-value</i> |
| <b>Continuous variable</b>   |                                                          |                           |                                           |                |
| <b>SUA (μmol/L)</b>          |                                                          |                           |                                           |                |
| Per-1                        | 1.01 (1.01,1.02)                                         | <0.001                    | 1.01 (1.01,1.02)                          | <0.001         |
| Per-SD                       | 1.70 (1.64,1.77)                                         | <0.001                    | 2.35 (2.16,2.55)                          | <0.001         |
| <b>Categorical variables</b> |                                                          |                           |                                           |                |
| <b>SUA</b>                   |                                                          |                           |                                           |                |
| Normal SUA                   | Reference                                                |                           | Reference                                 |                |
| High SUA                     | 2.40 (2.23,2.59)                                         | <0.001                    | 3.79 (3.23,4.45)                          | <0.001         |
| <b>Age group</b>             |                                                          |                           |                                           |                |
| <b>Youth (&lt;65 year)</b>   |                                                          | <b>Elderly (≥65 year)</b> |                                           |                |
|                              | <i>OR<sup>a</sup> (95%CI<sup>b</sup>)</i>                | <i>p-value</i>            | <i>OR<sup>a</sup> (95%CI<sup>b</sup>)</i> | <i>p-value</i> |
| <b>Continuous variable</b>   |                                                          |                           |                                           |                |
| <b>SUA (μmol/L)</b>          |                                                          |                           |                                           |                |
| Per-1                        | 1.01 (1.01,1.02)                                         | <0.001                    | 1.00 (1.00,1.01)                          | <0.001         |
| Per-SD                       | 1.87 (1.80,1.94)                                         | <0.001                    | 1.48 (1.34,1.62)                          | <0.001         |
| <b>Categorical variables</b> |                                                          |                           |                                           |                |
| <b>SUA</b>                   |                                                          |                           |                                           |                |
| Normal SUA                   | Reference                                                |                           | Reference                                 |                |
| High SUA                     | 2.78 (2.58,2.99)                                         | <0.001                    | 1.99 (1.63,2.43)                          | <0.001         |

**Note:** <sup>a</sup>OR: odds ratio; <sup>b</sup>CI: confidence interval.

<sup>c</sup>Model was adjusted for the variables of repeated times or years of medical checkup, age, sex, SBP, DBP, TC, TG, HDL-c, LDL-c, FPG, BUN, CR based on all medical checkup participants by using generalized estimation equation model (GEE).

<sup>e</sup>High SUA level was defined as the SUA greater than 420 mmol/L in men and greater than 360 mmol/L in women, while the others are normal.

1  
2  
3  
4  
5  
6  
7  
8  
9  
10  
11  
12  
13  
14  
15  
16  
17  
18  
19  
20  
21  
22  
23  
24  
25  
26  
27  
28  
29  
30  
31  
32  
33  
34  
35  
36  
37  
38  
39  
40  
41  
42  
43  
44  
45  
46  
47  
48  
49  
50  
51  
52  
53  
54  
55  
56  
57  
58  
59  
60



240x140mm (300 x 300 DPI)



155x117mm (300 x 300 DPI)

1  
2  
3  
4  
5  
6  
7  
8  
9  
10  
11  
12  
13  
14  
15  
16  
17  
18  
19  
20  
21  
22  
23  
24  
25  
26  
27  
28  
29  
30  
31  
32  
33  
34  
35  
36  
37  
38  
39  
40  
41  
42  
43  
44  
45  
46  
47  
48  
49  
50  
51  
52  
53  
54  
55  
56  
57  
58  
59  
60



127x63mm (300 x 300 DPI)





127x64mm (300 x 300 DPI)

## STROBE Statement—checklist of items that should be included in reports of observational studies

|                              | Item No | Recommendation                                                                                                                                                                                                                                                                                                                                                                                                                                                                 | Page No |
|------------------------------|---------|--------------------------------------------------------------------------------------------------------------------------------------------------------------------------------------------------------------------------------------------------------------------------------------------------------------------------------------------------------------------------------------------------------------------------------------------------------------------------------|---------|
| <b>Title and abstract</b>    | 1       | (a) Indicate the study's design with a commonly used term in the title or the abstract                                                                                                                                                                                                                                                                                                                                                                                         | 1-4     |
|                              |         | (b) Provide in the abstract an informative and balanced summary of what was done and what was found                                                                                                                                                                                                                                                                                                                                                                            | 1-4     |
| <b>Introduction</b>          |         |                                                                                                                                                                                                                                                                                                                                                                                                                                                                                |         |
| Background/rationale         | 2       | Explain the scientific background and rationale for the investigation being reported                                                                                                                                                                                                                                                                                                                                                                                           | 6       |
| Objectives                   | 3       | State specific objectives, including any prespecified hypotheses                                                                                                                                                                                                                                                                                                                                                                                                               | 7       |
| <b>Methods</b>               |         |                                                                                                                                                                                                                                                                                                                                                                                                                                                                                |         |
| Study design                 | 4       | Present key elements of study design early in the paper                                                                                                                                                                                                                                                                                                                                                                                                                        | 7       |
| Setting                      | 5       | Describe the setting, locations, and relevant dates, including periods of recruitment, exposure, follow-up, and data collection                                                                                                                                                                                                                                                                                                                                                | 7       |
| Participants                 | 6       | (a) <i>Cohort study</i> —Give the eligibility criteria, and the sources and methods of selection of participants. Describe methods of follow-up<br><br><i>Case-control study</i> —Give the eligibility criteria, and the sources and methods of case ascertainment and control selection. Give the rationale for the choice of cases and controls<br><br><i>Cross-sectional study</i> —Give the eligibility criteria, and the sources and methods of selection of participants | 7       |
|                              |         | (b) <i>Cohort study</i> —For matched studies, give matching criteria and number of exposed and unexposed<br><br><i>Case-control study</i> —For matched studies, give matching criteria and the number of controls per case                                                                                                                                                                                                                                                     | 7       |
| Variables                    | 7       | Clearly define all outcomes, exposures, predictors, potential confounders, and effect modifiers. Give diagnostic criteria, if applicable                                                                                                                                                                                                                                                                                                                                       | 7-8     |
| Data sources/<br>measurement | 8*      | For each variable of interest, give sources of data and details of methods of assessment (measurement). Describe comparability of assessment methods if there is more than one group                                                                                                                                                                                                                                                                                           | 7-8     |
| Bias                         | 9       | Describe any efforts to address potential sources of bias                                                                                                                                                                                                                                                                                                                                                                                                                      | 7-8     |
| Study size                   | 10      | Explain how the study size was arrived at                                                                                                                                                                                                                                                                                                                                                                                                                                      | 7-8     |

|    |                        |    |                                                                                                                              |
|----|------------------------|----|------------------------------------------------------------------------------------------------------------------------------|
| 1  |                        |    |                                                                                                                              |
| 2  | Quantitative variables | 11 | Explain how quantitative variables were handled in the analyses. If applicable, describe which groupings were chosen and why |
| 3  |                        |    |                                                                                                                              |
| 4  |                        |    |                                                                                                                              |
| 5  | Statistical methods    | 12 | (a) Describe all statistical methods, including those used to control for confounding                                        |
| 6  |                        |    |                                                                                                                              |
| 7  |                        |    |                                                                                                                              |
| 8  |                        |    |                                                                                                                              |
| 9  |                        |    | (b) Describe any methods used to examine subgroups and interactions                                                          |
| 10 |                        |    |                                                                                                                              |
| 11 |                        |    | (c) Explain how missing data were addressed                                                                                  |
| 12 |                        |    |                                                                                                                              |
| 13 |                        |    | (d) <i>Cohort study</i> —If applicable, explain how loss to follow-up was addressed                                          |
| 14 |                        |    |                                                                                                                              |
| 15 |                        |    |                                                                                                                              |
| 16 |                        |    | <i>Case-control study</i> —If applicable, explain how matching of cases and controls was addressed                           |
| 17 |                        |    |                                                                                                                              |
| 18 |                        |    |                                                                                                                              |
| 19 |                        |    |                                                                                                                              |
| 20 |                        |    | <i>Cross-sectional study</i> —If applicable, describe analytical methods taking account of sampling strategy                 |
| 21 |                        |    |                                                                                                                              |
| 22 |                        |    |                                                                                                                              |
| 23 |                        |    | (e) Describe any sensitivity analyses                                                                                        |
| 24 |                        |    |                                                                                                                              |
| 25 |                        |    |                                                                                                                              |
| 26 |                        |    |                                                                                                                              |
| 27 |                        |    |                                                                                                                              |
| 28 |                        |    |                                                                                                                              |
| 29 |                        |    |                                                                                                                              |
| 30 |                        |    |                                                                                                                              |
| 31 |                        |    |                                                                                                                              |
| 32 |                        |    |                                                                                                                              |
| 33 |                        |    |                                                                                                                              |
| 34 |                        |    |                                                                                                                              |
| 35 |                        |    |                                                                                                                              |
| 36 |                        |    |                                                                                                                              |
| 37 |                        |    |                                                                                                                              |
| 38 |                        |    |                                                                                                                              |
| 39 |                        |    |                                                                                                                              |
| 40 |                        |    |                                                                                                                              |
| 41 |                        |    |                                                                                                                              |
| 42 |                        |    |                                                                                                                              |
| 43 |                        |    |                                                                                                                              |
| 44 |                        |    |                                                                                                                              |
| 45 |                        |    |                                                                                                                              |
| 46 |                        |    |                                                                                                                              |
| 47 |                        |    |                                                                                                                              |
| 48 |                        |    |                                                                                                                              |
| 49 |                        |    |                                                                                                                              |
| 50 |                        |    |                                                                                                                              |
| 51 |                        |    |                                                                                                                              |
| 52 |                        |    |                                                                                                                              |
| 53 |                        |    |                                                                                                                              |
| 54 |                        |    |                                                                                                                              |
| 55 |                        |    |                                                                                                                              |
| 56 |                        |    |                                                                                                                              |
| 57 |                        |    |                                                                                                                              |
| 58 |                        |    |                                                                                                                              |
| 59 |                        |    |                                                                                                                              |
| 60 |                        |    |                                                                                                                              |

Continued on next page

1  
2  
3  
4  
5  
6  
7  
8  
9  
10  
11  
12  
13  
14  
15  
16  
17  
18  
19  
20  
21  
22  
23  
24  
25  
26  
27  
28  
29  
30  
31  
32  
33  
34  
35  
36  
37  
38  
39  
40  
41  
42  
43  
44  
45  
46  
47  
48  
49  
50  
51  
52  
53  
54  
55  
56  
57  
58  
59  
60**Results**

|                  |         |                                                                                                                                                                                                              |      |
|------------------|---------|--------------------------------------------------------------------------------------------------------------------------------------------------------------------------------------------------------------|------|
| Participants     | 13<br>* | (a) Report numbers of individuals at each stage of study—eg numbers potentially eligible, examined for eligibility, confirmed eligible, included in the study, completing follow-up, and analysed            | 9    |
|                  |         | (b) Give reasons for non-participation at each stage                                                                                                                                                         | 9    |
|                  |         | (c) Consider use of a flow diagram                                                                                                                                                                           | 9    |
| Descriptive data | 14<br>* | (a) Give characteristics of study participants (eg demographic, clinical, social) and information on exposures and potential confounders                                                                     | 9-10 |
|                  |         | (b) Indicate number of participants with missing data for each variable of interest                                                                                                                          | 9-10 |
|                  |         | (c) <i>Cohort study</i> —Summarise follow-up time (eg, average and total amount)                                                                                                                             | 9-10 |
| Outcome data     | 15<br>* | <i>Cohort study</i> —Report numbers of outcome events or summary measures over time                                                                                                                          | 9-10 |
|                  |         | <i>Case-control study</i> —Report numbers in each exposure category, or summary measures of exposure                                                                                                         | 9-10 |
|                  |         | <i>Cross-sectional study</i> —Report numbers of outcome events or summary measures                                                                                                                           | 9-10 |
| Main results     | 16      | (a) Give unadjusted estimates and, if applicable, confounder-adjusted estimates and their precision (eg, 95% confidence interval). Make clear which confounders were adjusted for and why they were included | 9-10 |
|                  |         | (b) Report category boundaries when continuous variables were categorized                                                                                                                                    | 9-10 |
|                  |         | (c) If relevant, consider translating estimates of relative risk into absolute risk for a meaningful time period                                                                                             | 9-10 |
| Other analyses   | 17      | Report other analyses done—eg analyses of subgroups and interactions, and sensitivity analyses                                                                                                               | 9-10 |

**Discussion**

|                  |    |                                                                                                                                                                            |       |
|------------------|----|----------------------------------------------------------------------------------------------------------------------------------------------------------------------------|-------|
| Key results      | 18 | Summarise key results with reference to study objectives                                                                                                                   | 10    |
| Limitations      | 19 | Discuss limitations of the study, taking into account sources of potential bias or imprecision. Discuss both direction and magnitude of any potential bias                 | 12    |
| Interpretation   | 20 | Give a cautious overall interpretation of results considering objectives, limitations, multiplicity of analyses, results from similar studies, and other relevant evidence | 13    |
| Generalisability | 21 | Discuss the generalisability (external validity) of the study results                                                                                                      | 10-13 |

**Other information**

|         |    |                                                                                                                                                               |    |
|---------|----|---------------------------------------------------------------------------------------------------------------------------------------------------------------|----|
| Funding | 22 | Give the source of funding and the role of the funders for the present study and, if applicable, for the original study on which the present article is based | 14 |
|---------|----|---------------------------------------------------------------------------------------------------------------------------------------------------------------|----|

1  
2  
3  
4 \*Give information separately for cases and controls in case-control studies and, if applicable, for exposed and  
5 unexposed groups in cohort and cross-sectional studies.  
6  
7  
8

9  
10 **Note:** An Explanation and Elaboration article discusses each checklist item and gives methodological background and  
11 published examples of transparent reporting. The STROBE checklist is best used in conjunction with this article (freely  
12 available on the Web sites of PLoS Medicine at <http://www.plosmedicine.org/>, Annals of Internal Medicine at  
13 <http://www.annals.org/>, and Epidemiology at <http://www.epidem.com/>). Information on the STROBE Initiative is  
14 available at [www.strobe-statement.org](http://www.strobe-statement.org).  
15  
16  
17  
18  
19  
20  
21  
22  
23  
24  
25  
26  
27  
28  
29  
30  
31  
32  
33  
34  
35  
36  
37  
38  
39  
40  
41  
42  
43  
44  
45  
46  
47  
48  
49  
50  
51  
52  
53  
54  
55  
56  
57  
58  
59  
60

For peer review only

# BMJ Open

## Association between serum uric acid and obesity in Chinese adults: A nine-year longitudinal data analysis

|                                 |                                                                                                                                                                                                                                                                                                                                                                                                                                                                                                                                                                                                                                                                                                                                                                                                                                                                                                                                                                                                                                                                                                                                                                                                                                                                                                                                          |
|---------------------------------|------------------------------------------------------------------------------------------------------------------------------------------------------------------------------------------------------------------------------------------------------------------------------------------------------------------------------------------------------------------------------------------------------------------------------------------------------------------------------------------------------------------------------------------------------------------------------------------------------------------------------------------------------------------------------------------------------------------------------------------------------------------------------------------------------------------------------------------------------------------------------------------------------------------------------------------------------------------------------------------------------------------------------------------------------------------------------------------------------------------------------------------------------------------------------------------------------------------------------------------------------------------------------------------------------------------------------------------|
| Journal:                        | <i>BMJ Open</i>                                                                                                                                                                                                                                                                                                                                                                                                                                                                                                                                                                                                                                                                                                                                                                                                                                                                                                                                                                                                                                                                                                                                                                                                                                                                                                                          |
| Manuscript ID                   | bmjopen-2020-041919.R2                                                                                                                                                                                                                                                                                                                                                                                                                                                                                                                                                                                                                                                                                                                                                                                                                                                                                                                                                                                                                                                                                                                                                                                                                                                                                                                   |
| Article Type:                   | Original research                                                                                                                                                                                                                                                                                                                                                                                                                                                                                                                                                                                                                                                                                                                                                                                                                                                                                                                                                                                                                                                                                                                                                                                                                                                                                                                        |
| Date Submitted by the Author:   | 05-Oct-2020                                                                                                                                                                                                                                                                                                                                                                                                                                                                                                                                                                                                                                                                                                                                                                                                                                                                                                                                                                                                                                                                                                                                                                                                                                                                                                                              |
| Complete List of Authors:       | Zeng, Jie; Guangdong Second Provincial General Hospital, Center for Clinical Epidemiology and Methodology<br>Lawrence, Wayne R; University at Albany State University of New York, Department of Epidemiology and Biostatistics<br>Yang, Jun; Jinan University, Institute for Environmental and Climate Research<br>Tian, Junzhang; Guangdong Second Provincial General Hospital, Center for Clinical Epidemiology and Methodology<br>Li, Cheng; Guangdong Second Provincial General Hospital, Guangdong Traditional Medical and Sports Injury Rehabilitation Research Institute<br>Lian, Wanmin; Guangdong Second Provincial General Hospital, Center for Information<br>He, Jingjun; Guangdong Second Provincial General Hospital, Center for Health Management and Examination<br>Qu, Hongying; Guangdong Second Provincial General Hospital, Center for Clinical Epidemiology and Methodology<br>Wang, Xiaojie; Guangdong Second Provincial General Hospital, Center for Clinical Epidemiology and Methodology<br>Liu, Hongmei; Guangdong Second Provincial General Hospital, Department of Ultrasound<br>Li, Guanming; Guangdong Second Provincial General Hospital, Center for Clinical Epidemiology and Methodology<br>Li, Guowei; Guangdong Second Provincial General Hospital, Center for Clinical Epidemiology and Methodology |
| <b>Primary Subject Heading</b>: | Epidemiology                                                                                                                                                                                                                                                                                                                                                                                                                                                                                                                                                                                                                                                                                                                                                                                                                                                                                                                                                                                                                                                                                                                                                                                                                                                                                                                             |
| Secondary Subject Heading:      | Rheumatology, Public health                                                                                                                                                                                                                                                                                                                                                                                                                                                                                                                                                                                                                                                                                                                                                                                                                                                                                                                                                                                                                                                                                                                                                                                                                                                                                                              |
| Keywords:                       | Public health < INFECTIOUS DISEASES, Risk management < HEALTH SERVICES ADMINISTRATION & MANAGEMENT, Epidemiology < TROPICAL MEDICINE                                                                                                                                                                                                                                                                                                                                                                                                                                                                                                                                                                                                                                                                                                                                                                                                                                                                                                                                                                                                                                                                                                                                                                                                     |
|                                 |                                                                                                                                                                                                                                                                                                                                                                                                                                                                                                                                                                                                                                                                                                                                                                                                                                                                                                                                                                                                                                                                                                                                                                                                                                                                                                                                          |

SCHOLARONE™  
Manuscripts

1  
2  
3  
4  
5  
6  
7  
8  
9  
10  
11  
12  
13  
14  
15  
16  
17  
18  
19  
20  
21  
22  
23  
24  
25  
26  
27  
28  
29  
30  
31  
32  
33  
34  
35  
36  
37  
38  
39  
40  
41  
42  
43  
44  
45  
46  
47  
48  
49  
50  
51  
52  
53  
54  
55  
56  
57  
58  
59  
60



I, the Submitting Author has the right to grant and does grant on behalf of all authors of the Work (as defined in the below author licence), an exclusive licence and/or a non-exclusive licence for contributions from authors who are: i) UK Crown employees; ii) where BMJ has agreed a CC-BY licence shall apply, and/or iii) in accordance with the terms applicable for US Federal Government officers or employees acting as part of their official duties; on a worldwide, perpetual, irrevocable, royalty-free basis to BMJ Publishing Group Ltd ("BMJ") its licensees and where the relevant Journal is co-owned by BMJ to the co-owners of the Journal, to publish the Work in this journal and any other BMJ products and to exploit all rights, as set out in our [licence](#).

The Submitting Author accepts and understands that any supply made under these terms is made by BMJ to the Submitting Author unless you are acting as an employee on behalf of your employer or a postgraduate student of an affiliated institution which is paying any applicable article publishing charge ("APC") for Open Access articles. Where the Submitting Author wishes to make the Work available on an Open Access basis (and intends to pay the relevant APC), the terms of reuse of such Open Access shall be governed by a Creative Commons licence – details of these licences and which [Creative Commons](#) licence will apply to this Work are set out in our licence referred to above.

Other than as permitted in any relevant BMJ Author's Self Archiving Policies, I confirm this Work has not been accepted for publication elsewhere, is not being considered for publication elsewhere and does not duplicate material already published. I confirm all authors consent to publication of this Work and authorise the granting of this licence.



1  
2  
3  
4 **Association between serum uric acid and obesity in Chinese adults: A**  
5  
6 **nine-year longitudinal data analysis**  
7  
8

9 Jie Zeng<sup>1,2</sup>, Wayne R. Lawrence<sup>3</sup>, Jun Yang<sup>4</sup>, Junzhang Tian<sup>1</sup>, Cheng Li<sup>5</sup>, Wanmin Lian<sup>6</sup>, Jingjun  
10 He<sup>7</sup>, Hongying Qu<sup>1,7</sup>, Xiaojie Wang<sup>1</sup>, Hongmei Liu<sup>2,8</sup>, Guanming Li<sup>1\*</sup>, and Guowei Li<sup>1,9\*</sup>  
11  
12

13  
14 <sup>1</sup> Center for Clinical Epidemiology and Methodology (CCEM), Guangdong Second Provincial  
15 General Hospital, Guangzhou, China.  
16

17 <sup>2</sup> Institute of Ultrasound in Musculoskeletal Sports Medicine, Guangdong Second Provincial  
18 General Hospital, Guangzhou, China.  
19

20 <sup>3</sup> Department of Epidemiology and Biostatistics, School of Public Health, University at Albany,  
21 State University of New York, One University Place, Rensselaer, New York.  
22

23 <sup>4</sup> Institute for Environmental and Climate Research, Jinan University, Guangzhou, 511443, China.  
24

25 <sup>5</sup> Guangdong Traditional Medical and Sports Injury Rehabilitation Research Institute, Guangdong  
26 Second Provincial General Hospital, Guangzhou, China.  
27

28 <sup>6</sup> Center for Information, Guangdong Second Provincial General Hospital, Guangzhou, China.  
29

30 <sup>7</sup> Center for Health Management and Examination, Guangdong Second Provincial General Hospital,  
31 Guangzhou, China.  
32

33 <sup>8</sup> Department of Ultrasound, Guangdong Second Provincial General Hospital, Guangzhou, China.  
34

35 <sup>9</sup> Department of Health Research Methods, Evidence, and Impact (HEI), McMaster University,  
36 Hamilton, ON, Canada.  
37  
38

39  
40  
41  
42 **\*Corresponding Authors:**

43 **Guowei Li, PhD**

44 CCEM, Guangdong Second Provincial General Hospital, Guangzhou 510317, China.  
45

46 Department of HEI, McMaster University, Hamilton, Canada L8S 4L8  
47

48 Telephone: 86-020-89169025; Fax: 86-020-89168021  
49

50 E-mail: liguowei099@126.com  
51

52 and  
53

54 **Guanming Li, MD**

55 CCEM, Guangdong Second Provincial General Hospital, Guangzhou 510317, China.  
56

57 Telephone: 86-020-32640264; Fax: 86-020-32640184  
58  
59

E-mail: lywergd@163.com

Word count: 2,953

For peer review only

1  
2  
3  
4  
5  
6  
7  
8  
9  
10  
11  
12  
13  
14  
15  
16  
17  
18  
19  
20  
21  
22  
23  
24  
25  
26  
27  
28  
29  
30  
31  
32  
33  
34  
35  
36  
37  
38  
39  
40  
41  
42  
43  
44  
45  
46  
47  
48  
49  
50  
51  
52  
53  
54  
55  
56  
57  
58  
59  
60

## 1 Abstract

2 **Objectives:** Hyperuricemia has been reported to be significantly associated with risk of obesity.  
3 However, previous studies on the association between serum uric acid (SUA) and body mass  
4 index (BMI) yielded conflicting results. The present study examined the relationship between  
5 SUA and obesity among Chinese adults.

6  
7 **Methods:** Data were collected at Guangdong Second Provincial General Hospital in Guangzhou  
8 City, China between January 2010 and December 2018. Participants with  $\geq 2$  medical checkup  
9 times were included in our analyses. Physical examinations and laboratory measurement variables  
10 were obtained from the medical checkup system. The high SUA level group was classified as  
11 participants with hyperuricemia, and obesity was defined as  $BMI \geq 28 \text{ kg/m}^2$ . Logistic regression  
12 model (LRM) was performed for data at baseline. For all participants, generalized estimation  
13 equation (GEE) model was used to assess the association between SUA and obesity, where the  
14 data were repeatedly measured over the nine-year study period. Subgroup analyses were  
15 performed by gender and age group. We calculated the cut-off values for SUA of obesity using the  
16 receiver operating characteristic curves (ROC) technique.

17  
18 **Results:** A total of 15,959 participants (10,023 males and 5,936 females) were included in this  
19 study, with an average age of 37.38 years (SD: 13.27) and average SUA of 367.05  $\mu\text{mol/L}$  (SD:  
20 97.97) at baseline, respectively. Finally, 1078 participants developed obesity over the 9-year  
21 period. The prevalence of obesity was approximately 14.2% for high SUA level. In logistic  
22 regression analysis at baseline, we observed a positive association between SUA and risk of  
23 obesity: OR=1.84 (95% CI: 1.77,1.90) for per-SD increase in SUA. Considering repeated  
24 measures over 9-year for all participants in the GEE model, the per-SD OR was 1.85 (95%  
25 CI:1.77,1.91) for SUA and the increased risk of obesity were greater for male (OR=1.45) and  
26 elderly participants (OR=1.01). In subgroup analyses by gender and age, we observed significant  
27 associations between SUA and obesity with higher risk in female (OR=2.35) and young

1  
2  
3  
4 28 participants (OR=1.87) when compared to male (OR=1.70) and elderly participants (OR=1.48).

5  
6 29 The SUA cut off points for risk of obesity using ROC curves were approximately consistent with  
7  
8 30 the international standard.  
9

10 31

11  
12  
13 32 **Conclusions:** Our study observed higher SUA level was associated with increased risk of obesity.

14  
15 33 More high-quality research is needed to further support these findings.  
16

17 34

18  
19  
20 35 **Keywords:** serum uric acid, obesity, generalized estimation equation model, risk factors, China  
21

22 36

23  
24  
25 37

26  
27  
28 38

29  
30  
31 39

32  
33 40

34  
35  
36 41

37  
38  
39 42

40  
41 43

42  
43  
44 44

45  
46  
47 45

48  
49 46

50  
51 47

52  
53 48

54  
55  
56  
57 49  
58  
59  
60

1  
2  
3  
4 50 **Strengths and limitations of this study**

5  
6 51 ➤ This is the first large long-term medical checkup study to explore the relationship between  
7  
8 52 SUA and obesity in China.

9  
10  
11 53 ➤ The study analysis was based on the GEE model which can increase the accuracy of the  
12  
13 54 prediction.

14  
15 55 ➤ The results from this study could inform prevention methods for obesity, especially in  
16  
17 56 medically underserved areas where medical service is insufficient.

18  
19  
20 57 ➤ The younger screening population in this study may underestimate the increased risk of uric  
21  
22 58 acid among the elderly obese.

23  
24  
25 59

26  
27  
28 60

## 61 Introduction

62 An individual's health behavior can influence both physical health and ability to recover from an  
63 illness. Annual medical checkup is an example of a positive health behavior, as this preventative  
64 measure is associated with earlier disease detection, greater treatment success, and faster recovery  
65 from a disease <sup>1</sup>. For this reason, medical data obtained from primary care is a useful source as it  
66 includes information on symptoms and healthcare utilization, all beneficial for use in prediction  
67 analysis. Medical checkup data often includes a variety of diagnostic tests to assess health status  
68 for early detection and disease prevention. Additionally, medical checkup data provides valuable  
69 information on present and past health conditions that are generally difficult to obtain in most  
70 population-based data <sup>2</sup>. More specifically, medical checkup data is a reliable and objective  
71 measure for identifying chronic diseases such as hyperuricemia and obesity.

72  
73 Serum uric acid (SUA) is the final product of purine metabolism in humans, potentially resulting  
74 in hyperuricemia <sup>3,4</sup>. In China, the prevalence of hyperuricemia is 13.3%, with 19.4% for men and  
75 7.9% for women <sup>5</sup>. Additionally, in 2019 the obesity prevalence was nearing 12% in China.  
76 Among obese patients, hyperuricemia is commonly observed. Although changes in obesity was  
77 reported to be independently correlated with changes in uric acid concentration, there might be an  
78 interaction between them as suggested in prior pathophysiological and metabolic studies <sup>6</sup>.  
79 Epidemiological and clinical evidence supports a strong significant positive association between  
80 SUA and obesity in the adult population of China, Japan, India, Pakistan, and Iraq <sup>7</sup>. A cross-  
81 sectional study showed that body mass index (BMI) significantly increases with elevated SUA  
82 among 27,009 middle-aged and elderly Chinese adults <sup>8</sup>. Previous research showed that  
83 hyperuricemia can cause obesity by accelerating hepatic and peripheral lipogenesis <sup>9</sup>. With the  
84 increasing prevalence of obesity among adults with hyperuricemia, it is of public health  
85 importance to evaluate the long-term epidemiological transitions to develop policies centered on  
86 intervention.

87

1  
2  
3  
4 88 Numerous trend analyses have reported the association between SUA and BMI based on short-  
5  
6 89 term survey data in China <sup>10, 11</sup>. However, there remains a gap in evidence regarding the long-term  
7  
8 90 trend for providing estimates on the risks of obesity among Chinese adults during the last two  
9  
10 91 decades. Therefore, the present study aimed to examine the relationship between SUA and risk of  
11  
12 92 obesity using the 9-year medical checkup data among Chinese adults from 2010 to 2018.

13  
14 93

## 16 94 **Methods**

### 17 95 **Study design and subjects**

18  
19  
20  
21  
22 96 We conducted a large retrospective study in China. Medical examinations were performed in 2010  
23  
24 97 and 2018 at the Guangdong Second Provincial General Hospital in Guangzhou City, China  
25  
26 98 (**Figure 1**). Individuals were excluded from the study due to having (1) less than two medical  
27  
28 99 checkups; (2) absence of blood biochemical examination; and (3) no documented information on  
29  
30 100 BMI. Thus, a total of 15,959 participants were included in the study analysis (**Figure 2**).  
31  
32 101

### 33 34 35 102 **Measurements**

36  
37 103 All participants were invited to join an in-person evaluation that included physical examination  
38  
39 104 and laboratory testing. Physical examinations were conducted following a standardized protocol,  
40  
41 105 including weight, height, waist circumference, hip circumference, and blood pressure. Waist  
42  
43 106 circumference was measured around the midway between the lowest border of the ribs and iliac  
44  
45 107 crest in the horizontal plane. The quality of anthropometric data was confirmed by repeated  
46  
47 108 measurements in the presence of researchers. Laboratory measurements were obtained to measure  
48  
49 109 SUA, systolic blood pressure (SBP), diastolic blood pressure (DBP), total cholesterol (TC),  
50  
51 110 triglycerides (TG), fasting plasma glucose (FPG), high-density lipoprotein cholesterol (HDL-C),  
52  
53 111 low-density lipoprotein cholesterol (LDL-C), creatinine (Cr) and blood urea nitrogen (BUN).  
54  
55 112

### 56 57 58 113 **Outcomes and definitions**

1  
2  
3  
4 114 Hyperuricemia was defined as having SUA concentrations  $>7.0$  mg/dL ( $416.4\mu\text{mol/L}$ ) in men  
5  
6 115 or  $>6.0$  mg/dL ( $356.9\mu\text{mol/L}$ ) in women<sup>12, 13</sup>. SUA levels were categorized into two groups  
7  
8 116 (normal and high SUA) to compare the prevalence of obesity and its association with SUA. The  
9  
10 117 high SUA level group was classified as participants with hyperuricemia. BMI was defined as  
11  
12 118 weight divided by height<sup>2</sup> ( $\text{kg/m}^2$ ) and categorized into two groups (non-obese [ $< 28 \text{ kg/m}^2$ ] and  
13  
14 119 obese [ $\geq 28 \text{ kg/m}^2$ ]) based on the Asia-Pacific criteria set by the World Health Organization<sup>14, 15</sup>.  
15  
16 120 We excluded patients taken drugs that might affect uric acid metabolism, such as losartan,  
17  
18 121 furosemide, and allopurinol.

19  
20 122

### 21 22 123 **Statistical analysis**

23  
24  
25 124 We conducted descriptive analysis to present the characteristics of baseline participants.  
26  
27 125 Continuous variables were reported as mean  $\pm$  standard deviation (SD) and categorical variables  
28  
29 126 as frequency and percentage, unless otherwise specified. Comparisons between two groups (obese  
30  
31 127 and non-obese) were performed using Student's t-tests for continuous variables and Chi-  
32  
33 128 square analyses for categorical variables. Logistic regression model (LRM) was used to evaluate  
34  
35 129 the relationship between risk of obesity and risk factors for the data at baseline. We also utilized  
36  
37 130 generalized estimating equations (GEE) models with unstructured correlation structures to  
38  
39 131 quantify their longitudinal association between SUA and risk of obesity<sup>16</sup>, given the data on SUA  
40  
41 132 and obesity were repeatedly measured over the 9-year study period. All models were adjusted for  
42  
43 133 age, gender, SBP, DBP, TC, TG, HDL-c, LDL-c, FPG, BUN, and CR in each group. Results were  
44  
45 134 presented as odds ratio (OR) and 95% confidence interval (CI) with per-1  $\mu\text{mol/L}$  or per-SD  
46  
47 135 increase in SUA.

48  
49 136

50  
51  
52 137 We performed subgroup analyses using GEE models by: 1) gender (male vs female); and 2) age  
53  
54 138 group (youth  $<65$  years vs. elderly  $\geq 65$  years). Additionally, we calculated the cut-off values of  
55  
56 139 SUA for risk of obesity using the receiver operating characteristic (ROC) curves, based on criteria  
57  
58 140 including (1) the point on the curve with minimum distance from the left-upper corner of the unit



1  
2  
3  
4 141 square; and (2) the point where the Youden's index is maximum<sup>17</sup>. A two-sided p-value less than  
5  
6 142 0.05 was considered as the statistically significant. Analyses were performed using R version 3.5.3  
7  
8 143 (R Foundation for Statistical Computing, Vienna, Austria).  
9

10 144

### 11 12 13 145 **Patient and public involvement**

14  
15 146 There were no patient and/or public involvement in the design of this study.  
16  
17  
18 147

### 19 20 21 148 **Results**

22  
23 149 There were 15,959 participants (10,023 males) included in this study. The average number of  
24  
25 150 health checkup for each participant was 2.62. Participants had a mean age of 37.38 years (SD:  
26  
27 151 13.27) and a mean SUA of 367.05  $\mu\text{mol/L}$  (SD: 97.97) at baseline, respectively. There were 1,227  
28  
29 152 (7.6%) participants that were obese at baseline. Significant differences between the obese and  
30  
31 153 non-obese groups were observed for SUA, age, gender, SBP, DBP, TC, TG, HDL-c, LDL-c, FPG,  
32  
33 154 BUN, and CR (p-value < 0.001) (**Table 1**). In total, the prevalence of obesity was approximately  
34  
35 155 14.2% for high SUA level. Obesity prevalence significantly increased with elevating SUA in the  
36  
37 156 subgroup analysis by gender and age group (p-value < 0.001). The prevalence was higher in males  
38  
39 157 than females. However, the prevalence had no obvious trend for by age groups (**Table 2**). The  
40  
41 158 prevalence of obesity significantly increased with the number of medical checkup years in the  
42  
43 159 group with high SUA and normal SUA levels (p<0.001 for trend) (**Figure 1**). Finally, 1078  
44  
45 160 participants developed obesity over the 9-year period.  
46

47 161

48  
49  
50 162 As presented in **Table 3**, we observed at baseline significant differences on risk of obesity for  
51  
52 163 SUA [per-1 OR=1.01 (95% CI: 1.01,1.02)] or [per-SD OR=1.84 (95% CI: 1.77,1.90)], age  
53  
54 164 [OR=1.02 (95% CI:1.02,1.03)], and male gender [OR=1.27 (95% CI:1.16,1.39)] in the logistic  
55  
56 165 regression analysis (Model 1). When converted to categorical analysis, the risks of obesity were  
57  
58 166 greater among those with high level of SUA, males and younger participants. Likewise, with  
59  
60

1  
2  
3  
4 167 longitudinal data on the repeated medical checkups in the multivariable GEE model (Model 2),  
5  
6 168 consistent risk factors for obesity were obtained. The estimates were observed as follows: [per-1  
7  
8 169 OR= 1.01 (95% CI: 1.01,1.02)] or [per-SD OR=1.85 (95% CI: 1.77,1.91)] for SUA, OR=1.45  
9  
10 170 (95% CI: 1.32,1.60) for male, and OR =1.01 (1.01, 1.02) for age. In additional analysis by  
11  
12 171 categorical variables, we observed similar results with higher risk in male and elderly participants.  
13  
14 172

15  
16  
17 173 As showed in **Table 4**, similar results for GEE model analyses were observed in subgroup  
18  
19 174 analyses. Significant associations between SUA and risk of obesity were observed, where female  
20  
21 175 [per-SD OR=2.35 (2.16,2.55)] and young participants [per-SD OR=1.87 (1.80,1.94)] had an  
22  
23 176 elevated risk. We also did the analysis of baseline uric acid values vs obesity at the 9-year mark in  
24  
25 177 males and females, respectively where one eliminates baseline cases with hypertension, diabetes  
26  
27 178 or elevated BS, dyslipidemia, normal kidney function, baseline obesity. This result was consistent  
28  
29 179 with the subgroup analysis and well validate the data.  
30  
31 180

32  
33  
34 181 To calculate the discrimination ability of SUA among obese participants at different times of  
35  
36 182 medical checkup (1 to 8) or different years of medical checkup (2010 to 2018), ROC curves were  
37  
38 183 calculated. **SFigure 1** and **SFigure 2** summarizes the cut-off values and the area under receiver  
39  
40 184 operating curves (AUCs) of SUA in obesity participants stratified by gender. We found that the  
41  
42 185 overall cut-off values of SUA were 429.5 $\mu$ mol/L (range: 411.5-488.5  $\mu$ mol/L) in males and  
43  
44 186 326.9 $\mu$ mol/L (range: 298.5-426.5  $\mu$ mol/L) in females when stratified by different times of medical  
45  
46 187 checkups. Similarly, we calculated the overall cut-off values for SUA, which were 429.5  $\mu$ mol/L  
47  
48 188 (range: 366.7-431.5  $\mu$ mol/L) in males and 326.9  $\mu$ mol/L (range: 301.5-362.1  $\mu$ mol/L) in females  
49  
50 189 when stratified by different years of medical checkups.  
51

52 190

## 53 54 191 **Discussion**

55  
56  
57 192 To the best of our knowledge, this is the first longitudinal study that estimated the relationship  
58  
59  
60

1  
2  
3  
4 193 between SUA and obesity over a long time period in China. The prevalence of obesity was  
5  
6 194 approximately 14.2% for high SUA level. Previous studies found that the prevalence of  
7  
8 195 hyperuricemia ranged from 2.5 to 25 % depending on the study population country <sup>18</sup>. For  
9  
10 196 instance, the prevalence rates were reported to be 5 % in the Caucasus and 24.4 % in Thailand <sup>19</sup>,  
11  
12 197 <sup>20</sup>. Overall, we found high SUA level was associated with increased risk of obesity, within OR  
13  
14 198 value of 1.85 (1.77,1.91) in the GEE model for all participants, which was nearly consistent with  
15  
16 199 prior studies <sup>21,22</sup>. Currently, obesity and hyperuricemia, as well as their associated health  
17  
18 200 complications (e.g. metabolic syndrome) have emerged as a major public health concern as a  
19  
20 201 result of the growing prevalence, and the estimated economic burden <sup>7</sup>.

22

23  
24 203 Several recent studies have investigated the mechanism of SUA on increasing the risk of obesity,  
25  
26 204 suggesting the influence of overproduction and poor renal excretion <sup>23</sup>. Prior studies reported that  
27  
28 205 increased SUA level is closely related to excessive production of UA and the reduction of urinary  
29  
30 206 uric acid excretion and clearance <sup>24</sup>. This ultimately leads to increased risk of patients with  
31  
32 207 visceral fatty obesity <sup>23</sup>. Visceral fat accumulation (VFA) results in a large influx of plasma free  
33  
34 208 fatty acids into the portal vein and liver. This stimulates the synthesis of triglycerides and  
35  
36 209 subsequently produced large amounts of UA through the activated UA synthesis pathway <sup>25,26</sup>.  
37  
38 210 Additionally, many researchers have reported a significant correlation between VFA and BMI <sup>27</sup>,  
39  
40 211 <sup>28</sup>. Therefore, because of the close biological relationship between UA and BMI, it is of great  
41  
42 212 importance for preventive medicine to pay attention to the interaction between UA and BMI.

44  
45 213

46  
47 214 Conflicting results regarding gender and age differences for the association between SUA and  
48  
49 215 obesity have been reported <sup>10,29</sup>. Our study found significant differences in obesity participants  
50  
51 216 with elevated OR value among high SUA level, male, and elderly for all medical checkup  
52  
53 217 participants. A similar study reported a positive relationship between BMI and SUA levels among  
54  
55 218 healthy individuals in China <sup>30</sup>. Nevertheless, in this study the subgroup analyses showed that  
56  
57 219 significant associated risk between SUA and obesity were observed higher in female and young

1  
2  
3  
4 220 participants. This is consistent with a Thailand study that reported high SUA concentrations were  
5  
6 221 associated with greater risk of obesity in females<sup>31</sup>. However, study in Bangladesh and Japan  
7  
8 222 reported that elevated SUA predicted obesity higher in males and the elderly<sup>8,29,31</sup>. Perhaps the  
9  
10 223 associations of SUA with obesity varies by populations. Moreover, in a 10-year follow-up study,  
11  
12 224 BMI was observed to significantly increase with higher SUA levels regardless of race and gender  
13  
14 225 <sup>32</sup>. Therefore, greater attention should be provided to those vulnerable populations in clinical  
15  
16 226 guidelines.

17  
18 227

19  
20 228 An important observation was that association between SUA and risk of obesity in the LRM  
21  
22 229 [OR=1.84 (1.77,1.90)] for data at baseline was nearly consistent with the analyses in the GEE  
23  
24 230 model [OR= (1.85 (1.77,1.91))] for 9-year all participants. The risk of obesity within  
25  
26 231 hyperuricemia remained stable over the years. Therefore, short-term medical checkup results can  
27  
28 232 reflect the development of chronic diseases<sup>33</sup>. Regarding the assessment of cut-off values from  
29  
30 233 ROC of SUA in obesity participants, the cut-off values of SUA were 429.5 $\mu$ mol/L in males and  
31  
32 234 326.9 $\mu$ mol/L in females in stratified analysis by times or years of medical checkup. The cut-off  
33  
34 235 value was approximately consistent with the international standard for males<sup>34</sup>. However, it was  
35  
36 236 underestimated for women in the group of obese participants. Perhaps the proportion of females  
37  
38 237 were fewer in this study. The cut-off values for SUA in the study may be useful for distinguishing  
39  
40 238 tests among obesity and non-obesity participants, which were significant for certain risk value  
41  
42 239 prediction and guidance<sup>35</sup>.

43  
44 240

45  
46  
47 241 We must note several limitations in the present study. First, the underlying mechanism by which  
48  
49 242 SUA is increased in obese individuals remains not well understood. Second, this study did not  
50  
51 243 collect information on whether participants were prescribed medication to treat hyperuricemia.  
52  
53 244 Additionally, some medications used to treat hypertension may increase uric acid levels. Third,  
54  
55 245 there are numerous confounding factors that have not been considered, which can be studied  
56  
57 246 together with questionnaires in the future. Moreover, the younger screening population in this

1  
2  
3  
4 247 study may underestimate the increased risk of uric acid among the elderly obese.  
5  
6 248  
7  
8

9 249 The present study has several strengths that must be noted. First, to our knowledge this is the first  
10 250 large long-term medical checkup study to explore the relationship between SUA and obesity in  
11 251 China. Second, the study analysis was based on the GEE model with high quality data by  
12 252 controlling for confounding factors, which can increase the accuracy of the prediction. Third,  
13 253 participants were representative of the general population with regard to clinical checkup and  
14 254 obesity status, enhancing the generalizability of our findings. Moreover, results from this study  
15 255 could inform prevention methods for obesity, especially in medically underserved areas where  
16 256 medical service is insufficient.  
17  
18  
19  
20  
21  
22  
23  
24  
25 257

26  
27  
28 258 This study filled current gaps in literature by analyzing the relationship between SUA and obesity  
29 259 using medical checkup data. We observed that medical checkup data can be used to improve the  
30 260 risk of obesity prediction accuracy. The medical checkup data used in this study can help provide  
31 261 information that will facilitate intervention development and adoption at the individual level<sup>36</sup>. The  
32 262 utility of medical checkup data can potentially reach beyond predictive power alone in the near  
33 263 future.  
34  
35  
36  
37  
38  
39  
40  
41  
42

## 43 265 **Conclusions**

44  
45 266 In conclusion, our study observed significant associations between SUA and obesity in this 9-year  
46 267 longitudinal study. We mainly found higher SUA level was associated with increased risk of  
47 268 obesity. The prevalence of obesity was approximately 14.2% and significantly increased with the  
48 269 number of medical checkup years in the group with high level of SUA. Additionally, the increased  
49 270 risk of obesity was greater for high SUA level, male, and elderly participants. Subgroup analyses  
50 271 revealed significant associations between SUA and obesity with higher risk for females and young  
51 272 participants. Additionally, the cut-off for SUA on risk of obesity were approximately consistent  
52  
53  
54  
55  
56  
57  
58  
59  
60

1  
2  
3  
4 273 with the international standard. More evidence from well-designed studies are needed to confirm  
5  
6 274 our findings.  
7  
8  
9  
10  
11  
12  
13  
14  
15  
16  
17  
18  
19  
20  
21  
22  
23  
24  
25  
26  
27  
28  
29  
30  
31  
32  
33  
34  
35  
36  
37  
38  
39  
40  
41  
42  
43  
44  
45  
46  
47  
48  
49  
50  
51  
52  
53  
54  
55  
56  
57  
58  
59  
60

For peer review only

**Author Contributions:**

Guowei Li, Jie Zeng, Guanming Li: conceived and designed the study.

Guowei Li, Jie Zeng, Wayne R. Lawrence, Jun Yang: acquired data, performed statistical analyses and interpretation, and drafted the manuscript.

Junzhang Tian, Cheng Li, Wanmin Lian, Jingjun He, Hongying Qu, Xiaojie Wang, Hongmei Liu: provided professional and statistical support, and made several critical revisions to the manuscript.

All authors read and approved the final manuscript.

**Acknowledgments:**

None declared.

**Conflicts of Interest:**

The authors declare that they have no conflict of interest.

**Data availability statement:**

All data relevant to the study are included in the article or uploaded as supplementary information.

**Funding:**

Research grants from the Science Foundation of Guangdong Second Provincial General Hospital (YQ2019-008).

## Reference

1. Nagahama S, Kashino I, Hu H, Nanri A, Kurotani K, Kuwahara K *et al.* Haemoglobin A1c and hearing impairment: longitudinal analysis using a large occupational health check-up data of Japan. *BMJ open* 2018; **8**(9): e023220.
2. Kim YJ, Park H. Improving Prediction of High-Cost Health Care Users with Medical Check-Up Data. *Big data* 2019; **7**(3): 163-175.
3. Global Burden of Disease Study C. Global, regional, and national incidence, prevalence, and years lived with disability for 301 acute and chronic diseases and injuries in 188 countries, 1990-2013: a systematic analysis for the Global Burden of Disease Study 2013. *Lancet* 2015; **386**(9995): 743-800.
4. Ng M, Fleming T, Robinson M, Thomson B, Graetz N, Margono C *et al.* Global, regional, and national prevalence of overweight and obesity in children and adults during 1980-2013: a systematic analysis for the Global Burden of Disease Study 2013. *Lancet* 2014; **384**(9945): 766-81.
5. Liu R, Han C, Wu D, Xia X, Gu J, Guan H *et al.* Prevalence of Hyperuricemia and Gout in Mainland China from 2000 to 2014: A Systematic Review and Meta-Analysis. *BioMed research international* 2015; **2015**: 762820.
6. Ishizaka N, Ishizaka Y, Toda A, Tani M, Koike K, Yamakado M *et al.* Changes in waist circumference and body mass index in relation to changes in serum uric acid in Japanese individuals. *The Journal of rheumatology* 2010; **37**(2): 410-6.
7. Chen MY, Zhao CC, Li TT, Zhu Y, Yu TP, Bao YQ *et al.* Serum uric acid levels are associated with obesity but not cardio-cerebrovascular events in Chinese inpatients with type 2 diabetes. *Scientific reports* 2017; **7**: 40009.
8. Dai X, Yuan J, Yao P, Yang B, Gui L, Zhang X *et al.* Association between serum uric acid and the metabolic syndrome among a middle- and old-age Chinese population. *European journal of epidemiology* 2013; **28**(8): 669-76.
9. Johnson RJ, Lanaspas MA, Gaucher EA. Uric acid: a danger signal from the RNA world that may have a role in the epidemic of obesity, metabolic syndrome, and cardiorenal disease: evolutionary considerations. *Seminars in nephrology* 2011; **31**(5): 394-9.
10. Ali N, Perveen R, Rahman S, Mahmood S, Rahman S, Islam S. Prevalence of hyperuricemia and the relationship between serum uric acid and obesity: A study on Bangladeshi adults. 2018; **13**(11): e0206850.
11. Yang C, Yang S, Feng C, Zhang C, Xu W, Zhang L *et al.* Associations of hyperuricemia and obesity with remission of nonalcoholic fatty liver disease among Chinese men: A retrospective cohort study. *PloS one* 2018; **13**(2): e0192396.
12. Sui X, Church TS, Meriwether RA, Lobelo F, Blair SN. Uric acid and the development of metabolic



- 1  
2  
3 syndrome in women and men. *Metabolism: clinical and experimental* 2008; **57**(6): 845-52.  
4  
5  
6 13. You L, Liu A, Wuyun G, Wu H, Wang P. Prevalence of hyperuricemia and the relationship  
7 between serum uric acid and metabolic syndrome in the Asian Mongolian area. *Journal of*  
8 *atherosclerosis and thrombosis* 2014; **21**(4): 355-65.  
9  
10 14. WHO. Appropriate body-mass index for Asian populations and its implications for policy and  
11 intervention strategies. *Lancet* 2004; **363**(9403): 157-63.  
12  
13 15. Li MF, Ren Y, Zhao CC, Zhang R, Li LX, Liu F *et al*. Prevalence and clinical characteristics of  
14 lower limb atherosclerotic lesions in newly diagnosed patients with ketosis-onset diabetes: a  
15 cross-sectional study. *Diabetology & metabolic syndrome* 2014; **6**: 71.  
16  
17 16. Buzkova P, Brown ER, John-Stewart GC. Longitudinal data analysis for generalized linear  
18 models under participant-driven informative follow-up: an application in maternal health  
19 epidemiology. *American journal of epidemiology* 2010; **171**(2): 189-97.  
20  
21 17. Habibzadeh F, Habibzadeh P, Yadollahie M. On determining the most appropriate test cut-off  
22 value: the case of tests with continuous results. *Biochemia medica* 2016; **26**(3): 297-307.  
23  
24 18. Remedios C, Shah M, Bhasker AG, Lakdawala M. Hyperuricemia: a reality in the Indian obese.  
25 *Obesity surgery* 2012; **22**(6): 945-8.  
26  
27 19. Uaratanawong S, Suraamornkul S, Angkeaw S, Uaratanawong R. Prevalence of hyperuricemia  
28 in Bangkok population. *Clinical rheumatology* 2011; **30**(7): 887-93.  
29  
30 20. Ford DK, Demos AM. Serum Uric Acid Levels of Healthy Caucasian, Chinese and Haida Indian  
31 Males in British Columbia. *Canadian Medical Association journal* 1964; **90**: 1295-7.  
32  
33 21. Kuwabara M, Kuwabara R, Hisatome I, Niwa K, Roncal-Jimenez CA, Bjornstad P *et al*.  
34 "Metabolically Healthy" Obesity and Hyperuricemia Increase Risk for Hypertension and  
35 Diabetes: 5-year Japanese Cohort Study. *Obesity* 2017; **25**(11): 1997-2008.  
36  
37 22. Zhang N, Chang Y, Guo X, Chen Y, Ye N, Sun Y. A Body Shape Index and Body Roundness  
38 Index: Two new body indices for detecting association between obesity and hyperuricemia in  
39 rural area of China. *European journal of internal medicine* 2016; **29**: 32-6.  
40  
41 23. Matsuura F, Yamashita S, Nakamura T, Nishida M, Nozaki S, Funahashi T *et al*. Effect of  
42 visceral fat accumulation on uric acid metabolism in male obese subjects: visceral fat obesity  
43 is linked more closely to overproduction of uric acid than subcutaneous fat obesity.  
44 *Metabolism: clinical and experimental* 1998; **47**(8): 929-33.  
45  
46 24. Han T, Meng X, Shan R, Zi T, Li Y, Ma H *et al*. Temporal relationship between hyperuricemia  
47 and obesity, and its association with future risk of type 2 diabetes. *International journal of*  
48 *obesity (2005)* 2018; **42**(7): 1336-1344.  
49  
50 25. Fabregat I, Revilla E, Machado A. Short-term control of the pentose phosphate cycle by  
51 insulin could be modulated by the NADPH/NADP ratio in rat adipocytes and hepatocytes.  
52 *Biochemical and biophysical research communications* 1987; **146**(2): 920-5.  
53  
54  
55  
56  
57  
58  
59  
60

- 1
  - 2
  - 3
  - 4
  - 5
  - 6
  - 7
  - 8
  - 9
  - 10
  - 11
  - 12
  - 13
  - 14
  - 15
  - 16
  - 17
  - 18
  - 19
  - 20
  - 21
  - 22
  - 23
  - 24
  - 25
  - 26
  - 27
  - 28
  - 29
  - 30
  - 31
  - 32
  - 33
  - 34
  - 35
  - 36
  - 37
  - 38
  - 39
  - 40
  - 41
  - 42
  - 43
  - 44
  - 45
  - 46
  - 47
  - 48
  - 49
  - 50
  - 51
  - 52
  - 53
  - 54
  - 55
  - 56
  - 57
  - 58
  - 59
  - 60
26. Fox IH. Metabolic basis for disorders of purine nucleotide degradation. *Metabolism: clinical and experimental* 1981; **30**(6): 616-34.
27. Examination Committee of Criteria for 'Obesity Disease' in J, Japan Society for the Study of O. New criteria for 'obesity disease' in Japan. *Circulation journal : official journal of the Japanese Circulation Society* 2002; **66**(11): 987-92.
28. Oka R, Miura K, Sakurai M, Nakamura K, Yagi K, Miyamoto S *et al.* Comparison of waist circumference with body mass index for predicting abdominal adipose tissue. *Diabetes research and clinical practice* 2009; **83**(1): 100-5.
29. Tanaka K, Ogata S, Tanaka H, Omura K, Honda C, Hayakawa K. The relationship between body mass index and uric acid: a study on Japanese adult twins. *Environmental health and preventive medicine* 2015; **20**(5): 347-53.
30. Wang H, Wang L, Xie R, Dai W, Gao C, Shen P *et al.* Association of Serum Uric Acid with Body Mass Index: A Cross-Sectional Study from Jiangsu Province, China. *Iranian journal of public health* 2014; **43**(11): 1503-9.
31. Jaipakdee J, Jiamjarasrangsri W, Lohsoonthorn V, Lertmaharit S. Prevalence of metabolic syndrome and its association with serum uric acid levels in Bangkok Thailand. *The Southeast Asian journal of tropical medicine and public health* 2013; **44**(3): 512-22.
32. Rathmann W, Haastert B, Icks A, Giani G, Roseman JM. Ten-year change in serum uric acid and its relation to changes in other metabolic risk factors in young black and white adults: the CARDIA study. *European journal of epidemiology* 2007; **22**(7): 439-45.
33. Nohara Y, Kai E. Health checkup and telemedical intervention program for preventive medicine in developing countries: verification study. 2015; **17**(1): e2.
34. Bardin T, Richette P. Definition of hyperuricemia and gouty conditions. *Current opinion in rheumatology* 2014; **26**(2): 186-91.
35. Mongioi LM, Condorelli RA, Barbagallo F, Cannarella R, La Vignera S, Calogero AE. Accuracy of the Low-Dose ACTH Stimulation Test for Adrenal Insufficiency Diagnosis: A Re-Assessment of the Cut-Off Value. *Journal of clinical medicine* 2019; **8**(6).
36. Taninaga J, Nishiyama Y. Prediction of future gastric cancer risk using a machine learning algorithm and comprehensive medical check-up data: A case-control study. 2019; **9**(1): 12384.

**Tables and Figure legends:**

**Table 1.** Baseline characteristics and comparison between obesity and non-obesity participants.

**Table 2.** The prevalence of obesity by gender, age of checkup stratified by baseline SUA.

**Table 3.** Relationship between risk factors and risk of obesity in the models.

**Table 4.** Relationship between risk factors and risk of obesity in the models stratified by gender and age group.

**Figure 1.** Location of Guangdong Second Provincial General Hospital (Guangzhou, Guangdong, China) and the prevalence of obesity by different years stratified by baseline SUA.

**Figure 2.** Flow diagram showing selection process of participants in our study.

**Supplemental data:**

**Supplementary Figure 1.** The ROC curves showing the relationship between SUA and risk of obesity stratified by gender and different times of medical checkups.

**Supplementary Figure 2.** The ROC curves showing the relationship between SUA and risk of obesity stratified by gender and different years of medical checkups (from 2010 to 2018).

**Table 1.** Baseline characteristics and comparison between obesity and non-obesity participants.

| Characteristics     | All patients   | Obesity <sup>a</sup> | Non-obesity    | <i>p</i> -value <sup>b</sup> |
|---------------------|----------------|----------------------|----------------|------------------------------|
|                     | n=15959        | n=1227               | n=14732        |                              |
| SUA (μmol/L) [SD]   | 367.05 (97.97) | 434.95 (97.65)       | 361.32 (95.82) | <0.001                       |
| Age (years) [SD]    | 37.38 (13.27)  | 40.40 (13.40)        | 37.13 (13.23)  | <0.001                       |
| Male [n, (%)]       | 10023 (62.8)   | 1012 (82.5)          | 9011 (61.2)    | <0.001                       |
| SBP (mmHg) [SD]     | 121.09 (15.85) | 131.78 (16.47)       | 120.19 (15.47) | <0.001                       |
| DBP (mmHg) [SD]     | 73.84 (10.31)  | 81.16 (11.41)        | 73.23 (9.97)   | <0.001                       |
| TC (mmol/L) [SD]    | 4.88 (0.93)    | 5.19 (0.95)          | 4.86 (0.93)    | <0.001                       |
| TG (mmol/L) [SD]    | 1.46 (1.10)    | 2.18 (1.49)          | 1.40 (1.04)    | <0.001                       |
| HDL-c (mmol/L) [SD] | 1.26 (0.25)    | 1.15 (0.22)          | 1.27 (0.25)    | <0.001                       |
| LDL-c (mmol/L) [SD] | 2.92 (0.78)    | 3.20 (0.80)          | 2.90 (0.77)    | <0.001                       |
| FPG (mmol/L) [SD]   | 5.06 (1.04)    | 5.51 (1.61)          | 5.03 (0.97)    | <0.001                       |
| BUN (mmol/L) [SD]   | 4.78 (1.25)    | 5.07 (1.30)          | 4.75 (1.24)    | <0.001                       |
| CR (mmol/L) [SD]    | 94.57 (17.12)  | 100.05 (16.17)       | 94.11 (17.12)  | <0.001                       |

**Note:** Continuous variables are presented as the means (standard derivation); SUA, serum uric acid; SBP, systolic blood pressure; DBP, diastolic blood pressure; TC, total cholesterol; TG, triglycerides; HDL-c, high-density lipoprotein cholesterol; LDL-c, low-density lipoprotein cholesterol; FPG, fasting plasma glucose; BUN, blood urea nitrogen; Cr, creatinine.

<sup>a</sup> Obesity was defined as body mass index (BMI)  $\geq 28.0$  kg/m<sup>2</sup>.

<sup>b</sup> *p* value for the difference of variables between the two datasets based on independent sample t-test or chi-square test.

\*The average number of health checkup for each participant is 2.62.

**Table 2.** The prevalence of obesity by gender, age of checkup stratified by baseline SUA.

| Variable         | Obesity prevalence, n (%) <sup>a</sup> |                 |         |
|------------------|----------------------------------------|-----------------|---------|
|                  | Normal SUA                             | High SUA        | P-value |
| <b>Gender</b>    |                                        |                 |         |
| Male             | 357/5280 (6.8)                         | 570/3768 (15.1) | <0.001  |
| Female           | 104/4431 (2.3)                         | 97/937 (10.3)   | <0.001  |
| <b>Age group</b> |                                        |                 |         |
| <30              | 88/3509 (2.5)                          | 168/1643 (10.2) | <0.001  |
| 30-44            | 182/3736 (4.9)                         | 309/1692 (18.3) | <0.001  |
| 45-59            | 121/1727 (7.0)                         | 125/865 (14.5)  | <0.001  |
| 60-74            | 54/606 (8.9)                           | 53/378 (14.0)   | <0.001  |
| ≥75              | 11/134 (8.2)                           | 12/127 (9.4)    | <0.001  |
| <b>Overall</b>   | 456/9711 (4.6)                         | 669/4705 (14.2) | <0.001  |

**Note:** High SUA level was defined as the SUA greater than 420 mmol/L in men and greater than 360 mmol/L in women, while the others are normal.

<sup>a</sup>Obesity prevalence = (n of obesity) / (total participants).

**Table 3.** Relationship between risk factors and risk of obesity in the models.

| Variable                    | Model 1 <sup>c</sup>                  |         | Model 2 <sup>d</sup>                  |         |
|-----------------------------|---------------------------------------|---------|---------------------------------------|---------|
|                             | OR <sup>a</sup> (95%CI <sup>b</sup> ) | p-value | OR <sup>a</sup> (95%CI <sup>b</sup> ) | p-value |
| <b>Continuous analysis</b>  |                                       |         |                                       |         |
| <b>SUA (μmol/L)</b>         |                                       |         |                                       |         |
| Per-1                       | 1.01 (1.01,1.02)                      | <0.001  | 1.01 (1.01,1.02)                      | <0.001  |
| Per-SD                      | 1.84 (1.77,1.90)                      | <0.001  | 1.85 (1.77,1.91)                      | <0.001  |
| <b>Gender [n, (%)]</b>      |                                       |         |                                       |         |
| Female                      | Reference                             |         | Reference                             |         |
| Male                        | 1.27 (1.16,1.39)                      | <0.001  | 1.45 (1.32,1.60)                      | <0.001  |
| Age (years)                 | 1.02 (1.02, 1.03)                     | <0.001  | 1.01 (1.01, 1.02)                     | <0.001  |
| <b>Categorical analysis</b> |                                       |         |                                       |         |
| <b>SUA<sup>e</sup></b>      |                                       |         |                                       |         |
| Normal SUA                  | Reference                             |         | Reference                             |         |
| High SUA                    | 2.02 (1.84, 2.23)                     | <0.001  | 2.57 (2.31, 2.87)                     | <0.001  |
| <b>Gender</b>               |                                       |         |                                       |         |
| Female                      | Reference                             |         | Reference                             |         |
| Male                        | 1.25 (1.09, 1.43)                     | 0.002   | 1.69 (1.59, 1.79)                     | <0.001  |
| <b>Age group</b>            |                                       |         |                                       |         |
| <30                         | Reference                             |         | Reference                             |         |
| 30-44                       | 1.38 (1.14, 1.66)                     | 0.001   | 1.73 (1.54, 1.91)                     | <0.001  |
| 45-59                       | 1.07 (0.89, 1.30)                     | 0.475   | 1.94 (1.72, 2.18)                     | <0.001  |
| 60-74                       | 1.12 (0.90, 1.38)                     | 0.314   | 1.99 (1.72, 2.32)                     | <0.001  |
| ≥75                         | 0.95 (0.71, 1.27)                     | 0.718   | 1.86(1.50, 2.31)                      | <0.001  |

**Note:** <sup>a</sup>OR: odds ratio; <sup>b</sup>CI: confidence interval.

<sup>c</sup>Model 1 was adjusted for the variables of SBP, DBP, TC, TG, HDL-c, LDL-c, FPG, BUN, CR based on the first time of medical checkup participants by using multivariate logistic regression model (LRM).

<sup>d</sup>Model 2 was adjusted for the variables of repeated times or years of medical checkup, SBP, DBP, TC, TG, HDL-c, LDL-c, FPG, BUN, CR based on all medical checkup participants by using generalized estimation equation model (GEE).

<sup>e</sup>High SUA level was defined as the SUA greater than 420 mmol/L in men and greater than 360 mmol/L in women, while the others are normal.

**Table 4.** Relationship between risk factors and risk of obesity in the models stratified by gender and age group.

| Variable                     | Generalized estimation equation model (GEE) <sup>c</sup> |                           |                                           |                |
|------------------------------|----------------------------------------------------------|---------------------------|-------------------------------------------|----------------|
|                              | Male                                                     |                           | Female                                    |                |
| Gender                       | <i>OR<sup>a</sup> (95%CI<sup>b</sup>)</i>                | <i>p-value</i>            | <i>OR<sup>a</sup> (95%CI<sup>b</sup>)</i> | <i>p-value</i> |
| <b>Continuous variable</b>   |                                                          |                           |                                           |                |
| <b>SUA (μmol/L)</b>          |                                                          |                           |                                           |                |
| Per-1                        | 1.01 (1.01,1.02)                                         | <0.001                    | 1.01 (1.01,1.02)                          | <0.001         |
| Per-SD                       | 1.70 (1.64,1.77)                                         | <0.001                    | 2.35 (2.16,2.55)                          | <0.001         |
| <b>Categorical variables</b> |                                                          |                           |                                           |                |
| <b>SUA</b>                   |                                                          |                           |                                           |                |
| Normal SUA                   | Reference                                                |                           | Reference                                 |                |
| High SUA                     | 2.40 (2.23,2.59)                                         | <0.001                    | 3.79 (3.23,4.45)                          | <0.001         |
| <b>Age group</b>             |                                                          |                           |                                           |                |
| <b>Youth (&lt;65 year)</b>   |                                                          | <b>Elderly (≥65 year)</b> |                                           |                |
|                              | <i>OR<sup>a</sup> (95%CI<sup>b</sup>)</i>                | <i>p-value</i>            | <i>OR<sup>a</sup> (95%CI<sup>b</sup>)</i> | <i>p-value</i> |
| <b>Continuous variable</b>   |                                                          |                           |                                           |                |
| <b>SUA (μmol/L)</b>          |                                                          |                           |                                           |                |
| Per-1                        | 1.01 (1.01,1.02)                                         | <0.001                    | 1.00 (1.00,1.01)                          | <0.001         |
| Per-SD                       | 1.87 (1.80,1.94)                                         | <0.001                    | 1.48 (1.34,1.62)                          | <0.001         |
| <b>Categorical variables</b> |                                                          |                           |                                           |                |
| <b>SUA</b>                   |                                                          |                           |                                           |                |
| Normal SUA                   | Reference                                                |                           | Reference                                 |                |
| High SUA                     | 2.78 (2.58,2.99)                                         | <0.001                    | 1.99 (1.63,2.43)                          | <0.001         |

**Note:** <sup>a</sup>OR: odds ratio; <sup>b</sup>CI: confidence interval.

<sup>c</sup>Model was adjusted for the variables of repeated times or years of medical checkup, age, sex, SBP, DBP, TC, TG, HDL-c, LDL-c, FPG, BUN, CR based on all medical checkup participants by using generalized estimation equation model (GEE).

<sup>e</sup>High SUA level was defined as the SUA greater than 420 mmol/L in men and greater than 360 mmol/L in women, while the others are normal.

1  
2  
3  
4  
5  
6  
7  
8  
9  
10  
11  
12  
13  
14  
15  
16  
17  
18  
19  
20  
21  
22  
23  
24  
25  
26  
27  
28  
29  
30  
31  
32  
33  
34  
35  
36  
37  
38  
39  
40  
41  
42  
43  
44  
45  
46  
47  
48  
49  
50  
51  
52  
53  
54  
55  
56  
57  
58  
59  
60

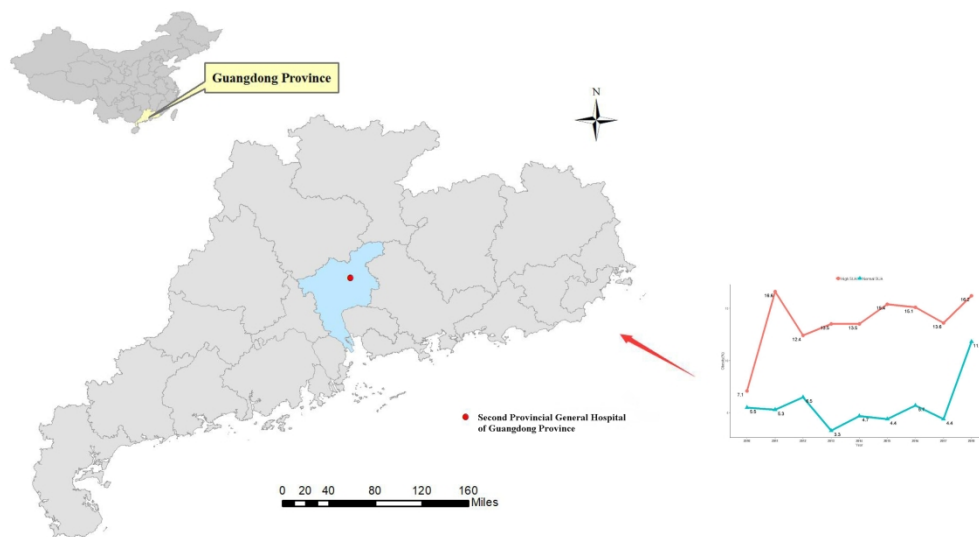

240x140mm (300 x 300 DPI)



1  
2  
3  
4  
5  
6  
7  
8  
9  
10  
11  
12  
13  
14  
15  
16  
17  
18  
19  
20  
21  
22  
23  
24  
25  
26  
27  
28  
29  
30  
31  
32  
33  
34  
35  
36  
37  
38  
39  
40  
41  
42  
43  
44  
45  
46  
47  
48  
49  
50  
51  
52  
53  
54  
55  
56  
57  
58  
59  
60

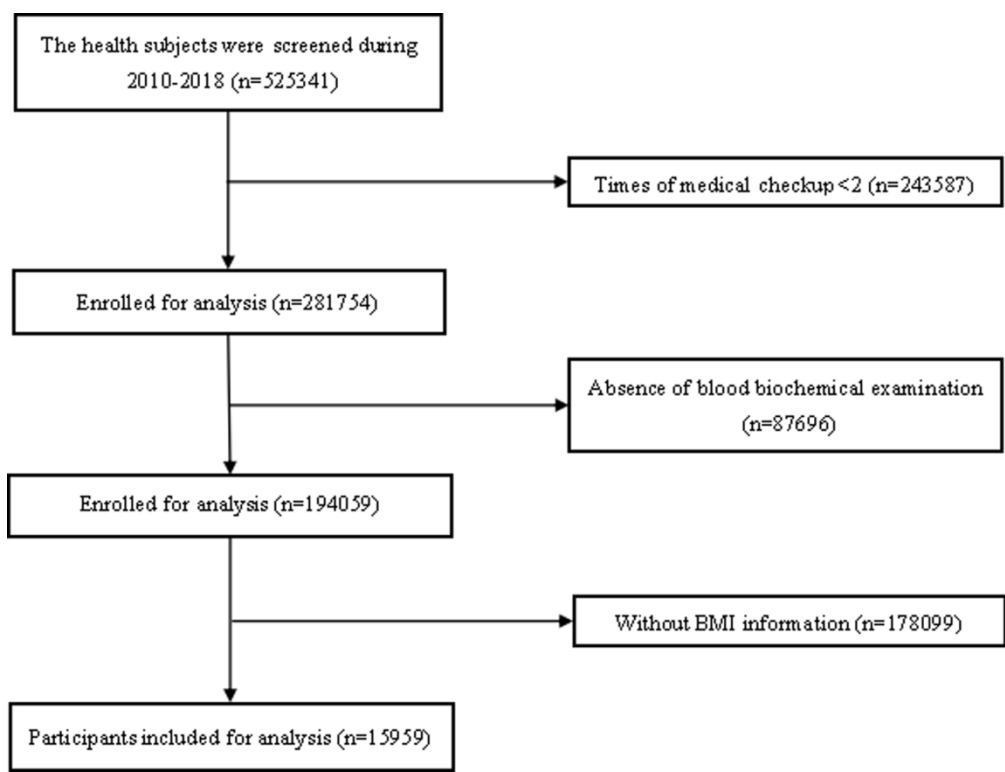

155x117mm (300 x 300 DPI)

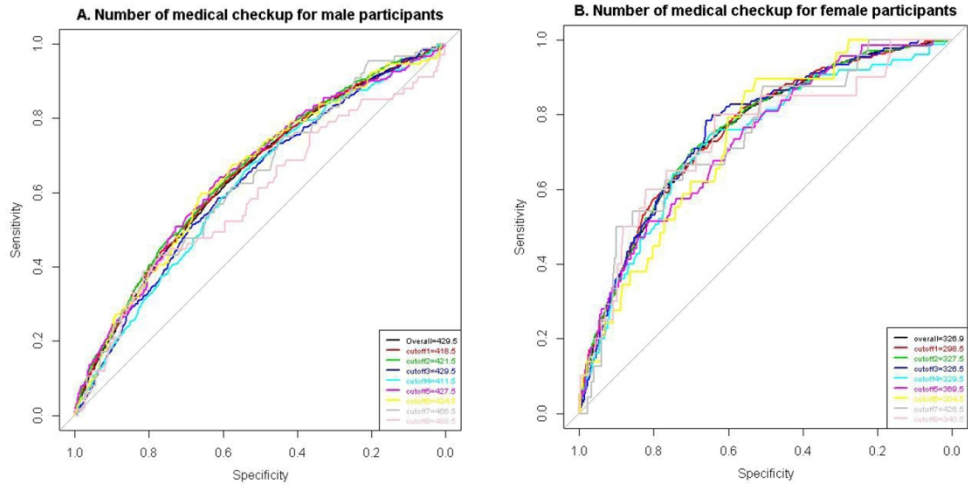

127x63mm (300 x 300 DPI)

1  
2  
3  
4  
5  
6  
7  
8  
9  
10  
11  
12  
13  
14  
15  
16  
17  
18  
19  
20  
21  
22  
23  
24  
25  
26  
27  
28  
29  
30  
31  
32  
33  
34  
35  
36  
37  
38  
39  
40  
41  
42  
43  
44  
45  
46  
47  
48  
49  
50  
51  
52  
53  
54  
55  
56  
57  
58  
59  
60

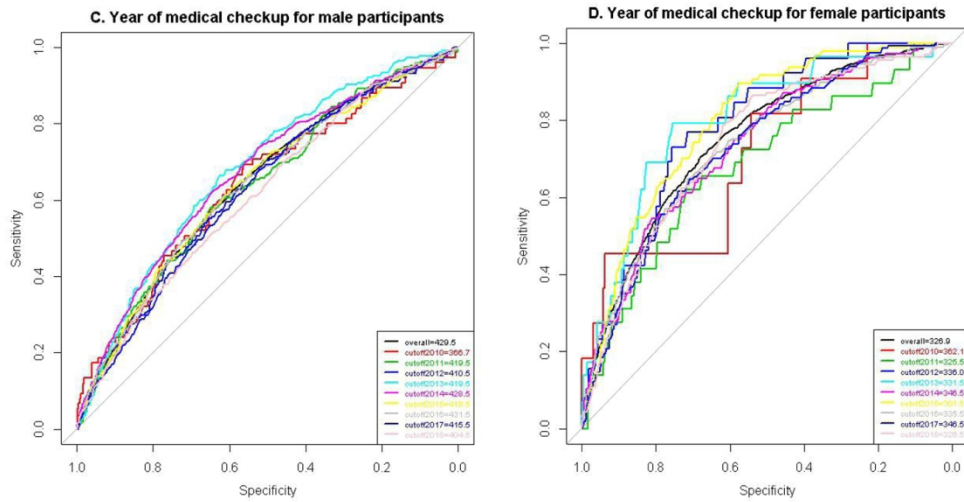

127x64mm (300 x 300 DPI)

## STROBE Statement—checklist of items that should be included in reports of observational studies

|                              | Item No | Recommendation                                                                                                                                                                                                                                                                                                                                                                                                                                                                 | Page No |
|------------------------------|---------|--------------------------------------------------------------------------------------------------------------------------------------------------------------------------------------------------------------------------------------------------------------------------------------------------------------------------------------------------------------------------------------------------------------------------------------------------------------------------------|---------|
| <b>Title and abstract</b>    | 1       | (a) Indicate the study's design with a commonly used term in the title or the abstract                                                                                                                                                                                                                                                                                                                                                                                         | 1-4     |
|                              |         | (b) Provide in the abstract an informative and balanced summary of what was done and what was found                                                                                                                                                                                                                                                                                                                                                                            | 1-4     |
| <b>Introduction</b>          |         |                                                                                                                                                                                                                                                                                                                                                                                                                                                                                |         |
| Background/rationale         | 2       | Explain the scientific background and rationale for the investigation being reported                                                                                                                                                                                                                                                                                                                                                                                           | 6       |
| Objectives                   | 3       | State specific objectives, including any prespecified hypotheses                                                                                                                                                                                                                                                                                                                                                                                                               | 7       |
| <b>Methods</b>               |         |                                                                                                                                                                                                                                                                                                                                                                                                                                                                                |         |
| Study design                 | 4       | Present key elements of study design early in the paper                                                                                                                                                                                                                                                                                                                                                                                                                        | 7       |
| Setting                      | 5       | Describe the setting, locations, and relevant dates, including periods of recruitment, exposure, follow-up, and data collection                                                                                                                                                                                                                                                                                                                                                | 7       |
| Participants                 | 6       | (a) <i>Cohort study</i> —Give the eligibility criteria, and the sources and methods of selection of participants. Describe methods of follow-up<br><br><i>Case-control study</i> —Give the eligibility criteria, and the sources and methods of case ascertainment and control selection. Give the rationale for the choice of cases and controls<br><br><i>Cross-sectional study</i> —Give the eligibility criteria, and the sources and methods of selection of participants | 7       |
|                              |         | (b) <i>Cohort study</i> —For matched studies, give matching criteria and number of exposed and unexposed<br><br><i>Case-control study</i> —For matched studies, give matching criteria and the number of controls per case                                                                                                                                                                                                                                                     | 7       |
| Variables                    | 7       | Clearly define all outcomes, exposures, predictors, potential confounders, and effect modifiers. Give diagnostic criteria, if applicable                                                                                                                                                                                                                                                                                                                                       | 7-8     |
| Data sources/<br>measurement | 8*      | For each variable of interest, give sources of data and details of methods of assessment (measurement). Describe comparability of assessment methods if there is more than one group                                                                                                                                                                                                                                                                                           | 7-8     |
| Bias                         | 9       | Describe any efforts to address potential sources of bias                                                                                                                                                                                                                                                                                                                                                                                                                      | 7-8     |
| Study size                   | 10      | Explain how the study size was arrived at                                                                                                                                                                                                                                                                                                                                                                                                                                      | 7-8     |

1  
2  
3  
4  
5  
6  
7  
8  
9  
10  
11  
12  
13  
14  
15  
16  
17  
18  
19  
20  
21  
22  
23  
24  
25  
26  
27  
28  
29  
30  
31  
32  
33  
34  
35  
36  
37  
38  
39  
40  
41  
42  
43  
44  
45  
46  
47  
48  
49  
50  
51  
52  
53  
54  
55  
56  
57  
58  
59  
60

|                        |    |                                                                                                                              |     |
|------------------------|----|------------------------------------------------------------------------------------------------------------------------------|-----|
| Quantitative variables | 11 | Explain how quantitative variables were handled in the analyses. If applicable, describe which groupings were chosen and why | 7-8 |
| Statistical methods    | 12 | (a) Describe all statistical methods, including those used to control for confounding                                        | 8   |
|                        |    | (b) Describe any methods used to examine subgroups and interactions                                                          | 8-9 |
|                        |    | (c) Explain how missing data were addressed                                                                                  | 8-9 |
|                        |    | (d) <i>Cohort study</i> —If applicable, explain how loss to follow-up was addressed                                          | 8-9 |
|                        |    | <i>Case-control study</i> —If applicable, explain how matching of cases and controls was addressed                           |     |
|                        |    | <i>Cross-sectional study</i> —If applicable, describe analytical methods taking account of sampling strategy                 |     |
|                        |    | (e) Describe any sensitivity analyses                                                                                        | 8-9 |

Continued on next page

1  
2  
3  
4  
5  
6  
7  
8  
9  
10  
11  
12  
13  
14  
15  
16  
17  
18  
19  
20  
21  
22  
23  
24  
25  
26  
27  
28  
29  
30  
31  
32  
33  
34  
35  
36  
37  
38  
39  
40  
41  
42  
43  
44  
45  
46  
47  
48  
49  
50  
51  
52  
53  
54  
55  
56  
57  
58  
59  
60**Results**

|                          |         |                                                                                                                                                                                                              |       |
|--------------------------|---------|--------------------------------------------------------------------------------------------------------------------------------------------------------------------------------------------------------------|-------|
| Participants             | 13<br>* | (a) Report numbers of individuals at each stage of study—eg numbers potentially eligible, examined for eligibility, confirmed eligible, included in the study, completing follow-up, and analysed            | 9     |
|                          |         | (b) Give reasons for non-participation at each stage                                                                                                                                                         | 9     |
|                          |         | (c) Consider use of a flow diagram                                                                                                                                                                           | 9     |
| Descriptive data         | 14<br>* | (a) Give characteristics of study participants (eg demographic, clinical, social) and information on exposures and potential confounders                                                                     | 9-10  |
|                          |         | (b) Indicate number of participants with missing data for each variable of interest                                                                                                                          | 9-10  |
|                          |         | (c) <i>Cohort study</i> —Summarise follow-up time (eg, average and total amount)                                                                                                                             | 9-10  |
| Outcome data             | 15<br>* | <i>Cohort study</i> —Report numbers of outcome events or summary measures over time                                                                                                                          | 9-10  |
|                          |         | <i>Case-control study</i> —Report numbers in each exposure category, or summary measures of exposure                                                                                                         | 9-10  |
|                          |         | <i>Cross-sectional study</i> —Report numbers of outcome events or summary measures                                                                                                                           | 9-10  |
| Main results             | 16      | (a) Give unadjusted estimates and, if applicable, confounder-adjusted estimates and their precision (eg, 95% confidence interval). Make clear which confounders were adjusted for and why they were included | 9-10  |
|                          |         | (b) Report category boundaries when continuous variables were categorized                                                                                                                                    | 9-10  |
|                          |         | (c) If relevant, consider translating estimates of relative risk into absolute risk for a meaningful time period                                                                                             | 9-10  |
| Other analyses           | 17      | Report other analyses done—eg analyses of subgroups and interactions, and sensitivity analyses                                                                                                               | 9-10  |
| <b>Discussion</b>        |         |                                                                                                                                                                                                              |       |
| Key results              | 18      | Summarise key results with reference to study objectives                                                                                                                                                     | 10    |
| Limitations              | 19      | Discuss limitations of the study, taking into account sources of potential bias or imprecision. Discuss both direction and magnitude of any potential bias                                                   | 12    |
| Interpretation           | 20      | Give a cautious overall interpretation of results considering objectives, limitations, multiplicity of analyses, results from similar studies, and other relevant evidence                                   | 13    |
| Generalisability         | 21      | Discuss the generalisability (external validity) of the study results                                                                                                                                        | 10-13 |
| <b>Other information</b> |         |                                                                                                                                                                                                              |       |
| Funding                  | 22      | Give the source of funding and the role of the funders for the present study and, if applicable, for the original study on which the present article is based                                                | 14    |

1  
2  
3  
4  
5  
6  
7  
8  
9  
10  
11  
12  
13  
14  
15  
16  
17  
18  
19  
20  
21  
22  
23  
24  
25  
26  
27  
28  
29  
30  
31  
32  
33  
34  
35  
36  
37  
38  
39  
40  
41  
42  
43  
44  
45  
46  
47  
48  
49  
50  
51  
52  
53  
54  
55  
56  
57  
58  
59  
60

\*Give information separately for cases and controls in case-control studies and, if applicable, for exposed and unexposed groups in cohort and cross-sectional studies.

**Note:** An Explanation and Elaboration article discusses each checklist item and gives methodological background and published examples of transparent reporting. The STROBE checklist is best used in conjunction with this article (freely available on the Web sites of PLoS Medicine at <http://www.plosmedicine.org/>, Annals of Internal Medicine at <http://www.annals.org/>, and Epidemiology at <http://www.epidem.com/>). Information on the STROBE Initiative is available at [www.strobe-statement.org](http://www.strobe-statement.org).

For peer review only

# BMJ Open

## Association between serum uric acid and obesity in Chinese adults: A nine-year longitudinal data analysis

|                                 |                                                                                                                                                                                                                                                                                                                                                                                                                                                                                                                                                                                                                                                                                                                                                                                                                                                                                                                                                                                                                                                                                                                                                                                                                                                                                                                                          |
|---------------------------------|------------------------------------------------------------------------------------------------------------------------------------------------------------------------------------------------------------------------------------------------------------------------------------------------------------------------------------------------------------------------------------------------------------------------------------------------------------------------------------------------------------------------------------------------------------------------------------------------------------------------------------------------------------------------------------------------------------------------------------------------------------------------------------------------------------------------------------------------------------------------------------------------------------------------------------------------------------------------------------------------------------------------------------------------------------------------------------------------------------------------------------------------------------------------------------------------------------------------------------------------------------------------------------------------------------------------------------------|
| Journal:                        | <i>BMJ Open</i>                                                                                                                                                                                                                                                                                                                                                                                                                                                                                                                                                                                                                                                                                                                                                                                                                                                                                                                                                                                                                                                                                                                                                                                                                                                                                                                          |
| Manuscript ID                   | bmjopen-2020-041919.R3                                                                                                                                                                                                                                                                                                                                                                                                                                                                                                                                                                                                                                                                                                                                                                                                                                                                                                                                                                                                                                                                                                                                                                                                                                                                                                                   |
| Article Type:                   | Original research                                                                                                                                                                                                                                                                                                                                                                                                                                                                                                                                                                                                                                                                                                                                                                                                                                                                                                                                                                                                                                                                                                                                                                                                                                                                                                                        |
| Date Submitted by the Author:   | 06-Nov-2020                                                                                                                                                                                                                                                                                                                                                                                                                                                                                                                                                                                                                                                                                                                                                                                                                                                                                                                                                                                                                                                                                                                                                                                                                                                                                                                              |
| Complete List of Authors:       | Zeng, Jie; Guangdong Second Provincial General Hospital, Center for Clinical Epidemiology and Methodology<br>Lawrence, Wayne R; University at Albany State University of New York, Department of Epidemiology and Biostatistics<br>Yang, Jun; Jinan University, Institute for Environmental and Climate Research<br>Tian, Junzhang; Guangdong Second Provincial General Hospital, Center for Clinical Epidemiology and Methodology<br>Li, Cheng; Guangdong Second Provincial General Hospital, Guangdong Traditional Medical and Sports Injury Rehabilitation Research Institute<br>Lian, Wanmin; Guangdong Second Provincial General Hospital, Center for Information<br>He, Jingjun; Guangdong Second Provincial General Hospital, Center for Health Management and Examination<br>Qu, Hongying; Guangdong Second Provincial General Hospital, Center for Clinical Epidemiology and Methodology<br>Wang, Xiaojie; Guangdong Second Provincial General Hospital, Center for Clinical Epidemiology and Methodology<br>Liu, Hongmei; Guangdong Second Provincial General Hospital, Department of Ultrasound<br>Li, Guanming; Guangdong Second Provincial General Hospital, Center for Clinical Epidemiology and Methodology<br>Li, Guowei; Guangdong Second Provincial General Hospital, Center for Clinical Epidemiology and Methodology |
| <b>Primary Subject Heading</b>: | Epidemiology                                                                                                                                                                                                                                                                                                                                                                                                                                                                                                                                                                                                                                                                                                                                                                                                                                                                                                                                                                                                                                                                                                                                                                                                                                                                                                                             |
| Secondary Subject Heading:      | Rheumatology, Public health                                                                                                                                                                                                                                                                                                                                                                                                                                                                                                                                                                                                                                                                                                                                                                                                                                                                                                                                                                                                                                                                                                                                                                                                                                                                                                              |
| Keywords:                       | Public health < INFECTIOUS DISEASES, Risk management < HEALTH SERVICES ADMINISTRATION & MANAGEMENT, Epidemiology < TROPICAL MEDICINE                                                                                                                                                                                                                                                                                                                                                                                                                                                                                                                                                                                                                                                                                                                                                                                                                                                                                                                                                                                                                                                                                                                                                                                                     |
|                                 |                                                                                                                                                                                                                                                                                                                                                                                                                                                                                                                                                                                                                                                                                                                                                                                                                                                                                                                                                                                                                                                                                                                                                                                                                                                                                                                                          |

SCHOLARONE™  
Manuscripts



1  
2  
3  
4  
5  
6  
7  
8  
9  
10  
11  
12  
13  
14  
15  
16  
17  
18  
19  
20  
21  
22  
23  
24  
25  
26  
27  
28  
29  
30  
31  
32  
33  
34  
35  
36  
37  
38  
39  
40  
41  
42  
43  
44  
45  
46  
47  
48  
49  
50  
51  
52  
53  
54  
55  
56  
57  
58  
59  
60



I, the Submitting Author has the right to grant and does grant on behalf of all authors of the Work (as defined in the below author licence), an exclusive licence and/or a non-exclusive licence for contributions from authors who are: i) UK Crown employees; ii) where BMJ has agreed a CC-BY licence shall apply, and/or iii) in accordance with the terms applicable for US Federal Government officers or employees acting as part of their official duties; on a worldwide, perpetual, irrevocable, royalty-free basis to BMJ Publishing Group Ltd ("BMJ") its licensees and where the relevant Journal is co-owned by BMJ to the co-owners of the Journal, to publish the Work in this journal and any other BMJ products and to exploit all rights, as set out in our [licence](#).

The Submitting Author accepts and understands that any supply made under these terms is made by BMJ to the Submitting Author unless you are acting as an employee on behalf of your employer or a postgraduate student of an affiliated institution which is paying any applicable article publishing charge ("APC") for Open Access articles. Where the Submitting Author wishes to make the Work available on an Open Access basis (and intends to pay the relevant APC), the terms of reuse of such Open Access shall be governed by a Creative Commons licence – details of these licences and which [Creative Commons](#) licence will apply to this Work are set out in our licence referred to above.

Other than as permitted in any relevant BMJ Author's Self Archiving Policies, I confirm this Work has not been accepted for publication elsewhere, is not being considered for publication elsewhere and does not duplicate material already published. I confirm all authors consent to publication of this Work and authorise the granting of this licence.

# Association between serum uric acid and obesity in Chinese adults: A nine-year longitudinal data analysis

Jie Zeng<sup>1,2</sup>, Wayne R. Lawrence<sup>3</sup>, Jun Yang<sup>4</sup>, Junzhang Tian<sup>1</sup>, Cheng Li<sup>5</sup>, Wanmin Lian<sup>6</sup>, Jingjun He<sup>7</sup>, Hongying Qu<sup>1,7</sup>, Xiaojie Wang<sup>1</sup>, Hongmei Liu<sup>2,8</sup>, Guanming Li<sup>1\*</sup>, and Guowei Li<sup>1,9\*</sup>

<sup>1</sup> Center for Clinical Epidemiology and Methodology (CCEM), Guangdong Second Provincial General Hospital, Guangzhou, China.

<sup>2</sup> Institute of Ultrasound in Musculoskeletal Sports Medicine, Guangdong Second Provincial General Hospital, Guangzhou, China.

<sup>3</sup> Department of Epidemiology and Biostatistics, School of Public Health, University at Albany, State University of New York, One University Place, Rensselaer, New York.

<sup>4</sup> Institute for Environmental and Climate Research, Jinan University, Guangzhou, 511443, China.

<sup>5</sup> Guangdong Traditional Medical and Sports Injury Rehabilitation Research Institute, Guangdong Second Provincial General Hospital, Guangzhou, China.

<sup>6</sup> Center for Information, Guangdong Second Provincial General Hospital, Guangzhou, China.

<sup>7</sup> Center for Health Management and Examination, Guangdong Second Provincial General Hospital, Guangzhou, China.

<sup>8</sup> Department of Ultrasound, Guangdong Second Provincial General Hospital, Guangzhou, China.

<sup>9</sup> Department of Health Research Methods, Evidence, and Impact (HEI), McMaster University, Hamilton, ON, Canada.

## \*Corresponding Authors:

### **Guowei Li, PhD**

CCEM, Guangdong Second Provincial General Hospital, Guangzhou 510317, China.

Department of HEI, McMaster University, Hamilton, Canada L8S 4L8

Telephone: 86-020-89169025; Fax: 86-020-89168021

E-mail: liguowei099@126.com

and

### **Guanming Li, MD**

CCEM, Guangdong Second Provincial General Hospital, Guangzhou 510317, China.

Telephone: 86-020-32640264; Fax: 86-020-32640184

E-mail: lywergd@163.com

Word count: 2,953

For peer review only

1  
2  
3  
4  
5  
6  
7  
8  
9  
10  
11  
12  
13  
14  
15  
16  
17  
18  
19  
20  
21  
22  
23  
24  
25  
26  
27  
28  
29  
30  
31  
32  
33  
34  
35  
36  
37  
38  
39  
40  
41  
42  
43  
44  
45  
46  
47  
48  
49  
50  
51  
52  
53  
54  
55  
56  
57  
58  
59  
60

## 1 Abstract

2 **Objectives:** Hyperuricemia has been reported to be significantly associated with risk of obesity.  
3 However, previous studies on the association between serum uric acid (SUA) and body mass  
4 index (BMI) yielded conflicting results. The present study examined the relationship between  
5 SUA and obesity among Chinese adults.

6  
7 **Methods:** Data were collected at Guangdong Second Provincial General Hospital in Guangzhou  
8 City, China between January 2010 and December 2018. Participants with  $\geq 2$  medical checkup  
9 times were included in our analyses. Physical examinations and laboratory measurement variables  
10 were obtained from the medical checkup system. The high SUA level group was classified as  
11 participants with hyperuricemia, and obesity was defined as  $BMI \geq 28 \text{ kg/m}^2$ . Logistic regression  
12 model (LRM) was performed for data at baseline. For all participants, generalized estimation  
13 equation (GEE) model was used to assess the association between SUA and obesity, where the  
14 data were repeatedly measured over the nine-year study period. Subgroup analyses were  
15 performed by gender and age group. We calculated the cut-off values for SUA of obesity using the  
16 receiver operating characteristic curves (ROC) technique.

17  
18 **Results:** A total of 15,959 participants (10,023 males and 5,936 females) were included in this  
19 study, with an average age of 37.38 years (SD: 13.27) and average SUA of  $367.05 \mu\text{mol/L}$  (SD:  
20  $97.97$ ) at baseline, respectively. Finally, 1078 participants developed obesity over the 9-year  
21 period. The prevalence of obesity was approximately 14.2% for high SUA level. In logistic  
22 regression analysis at baseline, we observed a positive association between SUA and risk of  
23 obesity:  $OR=1.84$  (95% CI: 1.77,1.90) for per-SD increase in SUA. Considering repeated  
24 measures over 9-year for all participants in the GEE model, the per-SD OR was 1.85 (95%  
25 CI:1.77,1.91) for SUA and the increased risk of obesity were greater for male ( $OR=1.45$ ) and  
26 elderly participants ( $OR=1.01$ ). In subgroup analyses by gender and age, we observed significant  
27 associations between SUA and obesity with higher risk in female ( $OR=2.35$ ) and young

1  
2  
3  
4 28 participants (OR=1.87) when compared to male (OR=1.70) and elderly participants (OR=1.48).  
5  
6 29 The SUA cutoff points for risk of obesity using ROC curves were approximately consistent with  
7  
8 30 the international standard.  
9

10 31

11  
12  
13 32 **Conclusions:** Our study observed higher SUA level was associated with increased risk of obesity.  
14  
15 33 More high-quality research is needed to further support these findings.  
16

17 34

18  
19  
20 35 **Keywords:** serum uric acid, obesity, generalized estimation equation model, risk factors, China  
21

22 36

23  
24  
25 37

26  
27  
28 38

29  
30  
31 39

32  
33  
34 40

35  
36  
37 41

38  
39  
40 42

41  
42  
43 43

44  
45  
46 44

47  
48  
49 45

50  
51  
52 46

53  
54  
55 47

56  
57  
58 48

59  
60 49

1  
2  
3  
4  
5  
6  
7  
8  
9  
10  
11  
12  
13  
14  
15  
16  
17  
18  
19  
20  
21  
22  
23  
24  
25  
26  
27  
28  
29  
30  
31  
32  
33  
34  
35  
36  
37  
38  
39  
40  
41  
42  
43  
44  
45  
46  
47  
48  
49  
50  
51  
52  
53  
54  
55  
56  
57  
58  
59  
60

50

51 **Strengths and limitations of this study**

52 ➤ This is the first large long-term medical checkup study to explore the relationship between  
53 SUA and obesity in China.

54 ➤ The study analysis was based on the GEE model which can increase the accuracy of the  
55 prediction.

56 ➤ The results from this study could inform prevention methods for obesity, especially in  
57 medically underserved areas where medical service is insufficient.

58 ➤ The younger screening population in this study may underestimate the increased risk of uric  
59 acid among the elderly obese.

60

61

## 62 Introduction

63 An individual's health behavior can influence both physical health and ability to recover from an  
64 illness. Annual medical checkup is an example of a positive health behavior, as this preventative  
65 measure is associated with earlier disease detection, greater treatment success, and faster recovery  
66 from a disease <sup>1</sup>. For this reason, medical data obtained from primary care is a useful source as it  
67 includes information on symptoms and health care utilization, all beneficial for use in prediction  
68 analysis. Medical checkup data often includes a variety of diagnostic tests to assess health status  
69 for early detection and disease prevention. Additionally, medical checkup data provides valuable  
70 information on present and past health conditions that are generally difficult to obtain in most  
71 population-based data <sup>2</sup>. More specifically, medical checkup data is a reliable and objective  
72 measure for identifying chronic diseases such as hyperuricemia and obesity.

73  
74 Serum uric acid (SUA) is the final product of purine metabolism in humans, potentially resulting  
75 in hyperuricemia<sup>3,4</sup>. In China, the prevalence of hyperuricemia is 13.3%, with 19.4% for men and  
76 7.9% for women<sup>5</sup>. Additionally, in 2019 the obesity prevalence was nearing 12% in China.  
77 Among obese patients, hyperuricemia is commonly observed. Although changes in obesity was  
78 reported to be independently correlated with changes in uric acid concentration, there might be an  
79 interaction between them as suggested in prior pathophysiological and metabolic studies <sup>6</sup>.  
80 Epidemiological and clinical evidence supports a strong significant positive association between  
81 SUA and obesity in the adult population of China, Japan, India, Pakistan, and Iraq <sup>7</sup>. A  
82 cross-sectional study showed that body mass index (BMI) significantly increases with elevated  
83 SUA among 27,009 middle-aged and elderly Chinese adults <sup>8</sup>. Previous research showed that  
84 hyperuricemia can cause obesity by accelerating hepatic and peripheral lipogenesis<sup>9</sup>. With the  
85 increasing prevalence of obesity among adults with hyperuricemia, it is of public health  
86 importance to evaluate the long-term epidemiological transitions to develop policies centered on  
87 intervention.

88



1  
2  
3  
4 89 Numerous trend analyses have reported the association between SUA and BMI based on  
5  
6 90 short-term survey data in China<sup>10, 11</sup>. However, there remains a gap in evidence regarding the  
7  
8 91 long-term trend for providing estimates on the risks of obesity among Chinese adults during the  
9  
10 92 last two decades. Therefore, the present study aimed to examine the relationship between SUA  
11  
12 93 and risk of obesity using the 9-year medical checkup data among Chinese adults from 2010 to  
13  
14 94 2018.

## 15 16 95 17 18 96 **Methods**

### 19 20 21 97 **Study design and subjects**

22  
23  
24 98 We conducted a large retrospective study in China. Medical examinations were performed in 2010  
25  
26 99 and 2018 at the Guangdong Second Provincial General Hospital in Guangzhou City, China  
27  
28 100 (**Figure 1**). Individuals were excluded from the study due to having (1) less than two medical  
29  
30 101 checkups; (2) absence of blood biochemical examination; and (3) no documented information on  
31  
32 102 BMI. Thus, a total of 15,959 participants were included in the study analysis (**Figure 2**).  
33  
34 103

### 35 36 37 104 **Measurements**

38  
39 105 All participants were invited to join an in-person evaluation that included physical examination  
40  
41 106 and laboratory testing. Physical examinations were conducted following a standardized protocol,  
42  
43 107 including weight, height, waist circumference, hip circumference, and blood pressure. Waist  
44  
45 108 circumference was measured around the midway between the lowest border of the ribs and iliac  
46  
47 109 crest in the horizontal plane. The quality of anthropometric data was confirmed by repeated  
48  
49 110 measurements in the presence of researchers. Laboratory measurements were obtained to measure  
50  
51 111 SUA, systolic blood pressure (SBP), diastolic blood pressure (DBP), total cholesterol (TC),  
52  
53 112 triglycerides (TG), fasting plasma glucose (FPG), high-density lipoprotein cholesterol (HDL-C),  
54  
55 113 low-density lipoprotein cholesterol (LDL-C), creatinine (Cr) and blood urea nitrogen (BUN).  
56  
57  
58 114

## 115 **Outcomes and definitions**

116 Hyperuricemia was defined as having SUA concentrations  $>7.0$  mg/dL ( $416.4\mu\text{mol/L}$ ) in men  
117 or  $>6.0$  mg/dL ( $356.9\mu\text{mol/L}$ ) in women<sup>12, 13</sup>. SUA levels were categorized into two groups  
118 (normal and high SUA) to compare the prevalence of obesity and its association with SUA. The  
119 high SUA level group was classified as participants with hyperuricemia. BMI was defined as  
120 weight divided by height<sup>2</sup> ( $\text{kg/m}^2$ ) and categorized into two groups (non-obese [ $< 28 \text{ kg/m}^2$ ] and  
121 obese [ $\geq 28 \text{ kg/m}^2$ ]) based on the Asia-Pacific criteria set by the World Health Organization<sup>14, 15</sup>.  
122 We excluded patients taken drugs that might affect uric acid metabolism, such as losartan,  
123 furosemide, and allopurinol.

## 125 **Statistical analysis**

126 We conducted descriptive analysis to present the characteristics of baseline participants.  
127 Continuous variables were reported as mean  $\pm$  standard deviation (SD) and categorical variables  
128 as frequency and percentage, unless otherwise specified. Comparisons between two groups (obese  
129 and non-obese) were performed using Student's t-tests for continuous variables and  
130 Chi-square analyses for categorical variables. Logistic regression model (LRM) was used to  
131 evaluate the relationship between risk of obesity and risk factors for the data at baseline. We also  
132 utilized generalized estimating equations (GEE) models with unstructured correlation structures to  
133 quantify their longitudinal association between SUA and risk of obesity<sup>16</sup>, given the data on SUA  
134 and obesity were repeatedly measured over the 9-year study period. All models were adjusted for  
135 age, gender, SBP, DBP, TC, TG, HDL-c, LDL-c, FPG, BUN, and CR in each group. Results were  
136 presented as odds ratio (OR) and 95% confidence interval (CI) with per-1  $\mu\text{mol/L}$  or per-SD  
137 increase in SUA.

138  
139 We performed subgroup analyses using GEE models by: 1) gender (male vs female); and 2) age  
140 group (youth  $<65$  years vs. elderly  $\geq 65$  years). Additionally, we calculated the cut-off values of  
141 SUA for risk of obesity using the receiver operating characteristic (ROC) curves, based on criteria

1  
2  
3  
4 142 including (1) the point on the curve with minimum distance from the left-upper corner of the unit  
5  
6 143 square; and (2) the point where the Youden's index is maximum<sup>17</sup>. A two-sided p-value less than  
7  
8 144 0.05 was considered as the statistically significant. Analyses were performed using R version 3.5.3  
9  
10 145 (R Foundation for Statistical Computing, Vienna, Austria).

11  
12 146

### 147 **Patient and public involvement**

148 There were no patient and/or public involvement in the design of this study.

149

### 150 **Results**

151 There were 15,959 participants (10,023 males) included in this study. The average number of  
152 health checkup for each participant was 2.62. Participants had a mean age of 37.38 years (SD:  
153 13.27) and a mean SUA of 367.05 μmol/L (SD: 97.97) at baseline, respectively. There were 1,227  
154 (7.6%) participants that were obese at baseline. Significant differences between the obese and  
155 non-obese groups were observed for SUA, age, gender, SBP, DBP, TC, TG, HDL-c, LDL-c, FPG,  
156 BUN, and CR (p-value < 0.001) (**Table 1**). In total, the prevalence of obesity was approximately  
157 14.2% for high SUA level. Obesity prevalence significantly increased with elevating SUA in the  
158 subgroup analysis by gender and age group (p-value < 0.001). The prevalence was higher in males  
159 than females. However, the prevalence had no obvious trend for by age groups (**Table 2**). The  
160 prevalence of obesity significantly increased with the number of medical checkup years in the  
161 group with high SUA and normal SUA levels (p<0.001 for trend) (**Figure 1**). Finally, 1078  
162 participants developed obesity over the 9-year period.

163

164 As presented in **Table 3**, we observed at baseline significant differences on risk of obesity for  
165 SUA [per-1OR=1.01 (95% CI: 1.01,1.02)] or [per-SD OR=1.84 (95% CI: 1.77,1.90)], age  
166 [OR=1.02 (95% CI:1.02,1.03)], and male gender [OR=1.27 (95% CI:1.16,1.39)] in the logistic  
167 regression analysis (Model 1). When converted to categorical analysis, the risks of obesity were

1  
2  
3  
4 168 greater among those with high level of SUA, males and younger participants. Likewise, with  
5  
6 169 longitudinal data on the repeated medical checkups in the multivariable GEE model (Model 2),  
7  
8 170 consistent risk factors for obesity were obtained. The estimates were observed as follows: [per-1  
9  
10 171 OR= 1.01 (95% CI: 1.01,1.02)] or [per-SD OR=1.85 (95% CI: 1.77,1.91)] for SUA, OR=1.45  
11  
12 172 (95% CI: 1.32,1.60) for male, and OR =1.01 (1.01, 1.02) for age. In additional analysis by  
13  
14 173 categorical variables, we observed similar results with higher risk in male and elderly participants.

15  
16 174

17  
18 175 As showed in **Table 4**, similar results for GEE model analyses were observed in subgroup  
19  
20 176 analyses. Significant associations between SUA and risk of obesity were observed, where female  
21  
22 177 [per-SD OR=2.35 (2.16,2.55)] and young participants [per-SD OR=1.87 (1.80,1.94)] had an  
23  
24 178 elevated risk. We also did the analysis of baseline uric acid values vs obesity at the 9-year mark in  
25  
26 179 males and females, respectively where one eliminates baseline cases with hypertension, diabetes  
27  
28 180 or elevated BS, dyslipidemia, normal kidney function, baseline obesity. This result was consistent  
29  
30 181 with the subgroup analysis and well validate the data.

31  
32  
33 182

34  
35 183 To calculate the discrimination ability of SUA among obese participants at different times of  
36  
37 184 medical checkup (1 to 8) or different years of medical checkup (2010 to 2018), ROC curves were  
38  
39 185 calculated. **SFigure 1** and **SFigure 2** summarizes the cut-off values and the area under receiver  
40  
41 186 operating curves (AUCs) of SUA in obesity participants stratified by gender. We found that the  
42  
43 187 overall cut-off values of SUA were 429.5 $\mu$ mol/L (range: 411.5-488.5  $\mu$ mol/L) in males  
44  
45 188 and 326.9 $\mu$ mol/L (range: 298.5-426.5  $\mu$ mol/L) in females when stratified by different times of  
46  
47 189 medical checkups. Similarly, we calculated the overall cut-off values for SUA, which were 429.5  
48  
49 190  $\mu$ mol/L (range: 366.7-431.5  $\mu$ mol/L) in males and 326.9  $\mu$ mol/L (range: 301.5-362.1  $\mu$ mol/L) in  
50  
51 191 females when stratified by different years of medical checkups.

52  
53  
54 192

55  
56 193 **Discussion**

1  
2  
3  
4 194 To the best of our knowledge, this is the first longitudinal study that estimated the relationship  
5  
6 195 between SUA and obesity over a long time period in China. The prevalence of obesity was  
7  
8 196 approximately 14.2% for high SUA level. Previous studies found that the prevalence of  
9  
10 197 hyperuricemia ranged from 2.5 to 25 % depending on the study population country <sup>18</sup>.For instance,  
11  
12 198 the prevalence rates were reported to be 5 % in the Caucasus and 24.4 % in Thailand<sup>19, 20</sup>. Overall,  
13  
14 199 we found high SUA level was associated with increased risk of obesity, within OR value of 1.85  
15  
16 200 (1.77,1.91) in the GEE model for all participants, which was nearly consistent with prior studies <sup>21</sup>,  
17  
18 201 <sup>22</sup>. Currently, obesity and hyperuricemia, as well as their associated health complications (e.g.  
19  
20 202 metabolic syndrome) have emerged as a major public health concern as a result of the growing  
21  
22 203 prevalence, and the estimated economic burden<sup>7</sup>.

204

205 Several recent studies have investigated the mechanism of SUA on increasing the risk of obesity,  
206 suggesting the influence of overproduction and poor renal excretion<sup>23</sup>. Prior studies reported that  
207 increased SUA level is closely related to excessive production of UA and the reduction of urinary  
208 uric acid excretion and clearance <sup>24</sup>. This ultimately leads to increased risk of patients with  
209 visceral fatty obesity<sup>23</sup>. Visceral fat accumulation (VFA) results in a large influx of plasma free  
210 fatty acids into the portal vein and liver. This stimulates the synthesis of triglycerides and  
211 subsequently produced large amounts of UA through the activated UA synthesis pathway<sup>25, 26</sup>.  
212 Additionally, many researchers have reported a significant correlation between VFA and BMI<sup>27</sup>,  
213 <sup>28</sup>. Therefore, because of the close biological relationship between UA and BMI, it is of great  
214 importance for preventive medicine to pay attention to the interaction between UA and BMI.

215

216 Conflicting results regarding gender and age differences for the association between SUA and  
217 obesity have been reported<sup>10, 29</sup>.Our study found significant differences in obesity participants with  
218 elevated OR value among high SUA level, male, and elderly for all medical checkup participants.  
219 A similar study reported a positive relationship between BMI and SUA levels among healthy  
220 individuals in China<sup>30</sup>. Nevertheless, in this study the subgroup analyses showed that significant

1  
2  
3  
4 221 associated risk between SUA and obesity were observed higher in female and young participants.  
5  
6 222 This is consistent with a Thailand study that reported high SUA concentrations were associated  
7  
8 223 with greater risk of obesity in females<sup>31</sup>. However, study in Bangladesh and Japan reported that  
9  
10 224 elevated SUA predicted obesity higher in males and the elderly<sup>8, 29, 31</sup>. Perhaps the associations of  
11  
12 225 SUA with obesity varies by populations. Moreover, in a 10-year follow-up study, BMI was  
13  
14 226 observed to significantly increase with higher SUA levels regardless of race and gender <sup>32</sup>.  
15  
16 227 Therefore, greater attention should be provided to those vulnerable populations in clinical  
17  
18 228 guidelines.

19  
20 229

21  
22 230 An important observation was that association between SUA and risk of obesity in the LRM  
23  
24 231 [OR=1.84 (1.77,1.90)] for data at baseline was nearly consistent with the analyses in the GEE  
25  
26 232 model [OR= (1.85 (1.77,1.91))] for 9-year all participants. The risk of obesity within  
27  
28 233 hyperuricemia remained stable over the years. Therefore, short-term medical checkup results can  
29  
30 234 reflect the development of chronic diseases<sup>33</sup>. Regarding the assessment of cut-off values from  
31  
32 235 ROC of SUA in obesity participants, the cut-off values of SUA were 429.5 $\mu$ mol/L in  
33  
34 236 males and 326.9 $\mu$ mol/L in females in stratified analysis by times or years of medical checkup. The  
35  
36 237 cut-off value was approximately consistent with the international standard for males<sup>34</sup>. However, it  
37  
38 238 was underestimated for women in the group of obese participants. Perhaps the proportion of  
39  
40 239 females were fewer in this study. The cut-off values for SUA in the study may be useful for  
41  
42 240 distinguishing tests among obesity and non-obesity participants, which were significant for certain  
43  
44 241 risk value prediction and guidance<sup>35</sup>.

45  
46 242

47  
48  
49 243 To our knowledge, we must note several limitations in the present study. First, the underlying  
50  
51 244 mechanism by which SUA is increased in obese individuals remains not well understood. Second,  
52  
53 245 this study did not collect information on whether participants were prescribed medication to treat  
54  
55 246 hyperuricemia. Additionally, some medications used to treat hypertension may increase uric acid  
56  
57 247 levels. Third, there are numerous confounding factors that have not been considered, which can be

1  
2  
3  
4 248 studied together with questionnaires in the future. Moreover, the younger screening population in  
5 249 this study may underestimate the increased risk of uric acid among the elderly obese.

6  
7  
8 250

9  
10 251 The present study has several strengths that must be noted. First, to our knowledge this is the first  
11 252 large long-term medical checkup study to explore the relationship between SUA and obesity in  
12 253 China. Second, the study analysis was based on the GEE model with high quality data by  
13 254 controlling for confounding factors, which can increase the accuracy of the prediction. Third,  
14 255 participants were representative of the general population with regard to clinical checkup and  
15 256 obesity status, enhancing the generalizability of our findings. Moreover, results from this study  
16 257 could inform prevention methods for obesity, especially in medically underserved areas where  
17 258 medical service is insufficient.

18  
19  
20  
21  
22  
23  
24  
25  
26  
27 259

28  
29 260 This study filled current gaps in literature by analyzing the relationship between SUA and obesity  
30 261 using medical checkup data. We observed that medical checkup data can be used to improve the  
31 262 risk of obesity prediction accuracy. The medical checkup data used in this study can help provide  
32 263 information that will facilitate intervention development and adoption at the individual level <sup>36</sup>.  
33 264 The utility of medical checkup data can potentially reach beyond predictive power alone in the  
34 265 near future.

35  
36  
37  
38  
39  
40  
41  
42 266

## 43 44 267 **Conclusions**

45  
46  
47 268 In conclusion, our study observed significant associations between SUA and obesity in this 9-year  
48 269 longitudinal study. We mainly found higher SUA level was associated with increased risk of  
49 270 obesity. The prevalence of obesity was approximately 14.2% and significantly increased with the  
50 271 number of medical checkup years in the group with high level of SUA. Additionally, the increased  
51 272 risk of obesity was greater for high SUA level, male, and elderly participants. Subgroup analyses  
52 273 revealed significant associations between SUA and obesity with higher risk for females and young

1  
2  
3  
4 274 participants. Additionally, the cut-off for SUA on risk of obesity were approximately consistent  
5  
6 275 with the international standard. More evidence from well-designed studies are needed to confirm  
7  
8 276 our findings.  
9  
10  
11  
12  
13  
14  
15  
16  
17  
18  
19  
20  
21  
22  
23  
24  
25  
26  
27  
28  
29  
30  
31  
32  
33  
34  
35  
36  
37  
38  
39  
40  
41  
42  
43  
44  
45  
46  
47  
48  
49  
50  
51  
52  
53  
54  
55  
56  
57  
58  
59  
60

For peer review only



**Author Contributions:**

Guowei Li, Jie Zeng, Guanming Li: conceived and designed the study.

Guowei Li, Jie Zeng, Wayne R. Lawrence, Jun Yang: acquired data, performed statistical analyses and interpretation, and drafted the manuscript.

Junzhang Tian, Cheng Li, Wanmin Lian, Jingjun He, Hongying Qu, Xiaojie Wang, Hongmei Liu: provided professional and statistical support, and made several critical revisions to the manuscript.

All authors read and approved the final manuscript.

**Acknowledgments:**

None declared.

**Conflicts of Interest:**

The authors declare that they have no conflict of interest.

**Ethics approval:**

The need for consent was waived due to the nature of this study. The IRB waived the informed consent.

**Data availability statement:**

All data relevant to the study are included in the article or uploaded as supplementary information.

**Funding:**

Research grants from the Science Foundation of Guangdong Second Provincial General Hospital (YQ2019-008).

## Reference

1. Nagahama S, Kashino I, Hu H, Nanri A, Kurotani K, Kuwahara K *et al*. Haemoglobin A1c and hearing impairment: longitudinal analysis using a large occupational health check-up data of Japan. *BMJ open* 2018; **8**(9): e023220.
2. Kim YJ, Park H. Improving Prediction of High-Cost Health Care Users with Medical Check-Up Data. *Big data* 2019; **7**(3): 163-175.
3. Global Burden of Disease Study C. Global, regional, and national incidence, prevalence, and years lived with disability for 301 acute and chronic diseases and injuries in 188 countries, 1990-2013: a systematic analysis for the Global Burden of Disease Study 2013. *Lancet* 2015; **386**(9995): 743-800.
4. Ng M, Fleming T, Robinson M, Thomson B, Graetz N, Margono C *et al*. Global, regional, and national prevalence of overweight and obesity in children and adults during 1980-2013: a systematic analysis for the Global Burden of Disease Study 2013. *Lancet* 2014; **384**(9945): 766-81.
5. Liu R, Han C, Wu D, Xia X, Gu J, Guan H *et al*. Prevalence of Hyperuricemia and Gout in Mainland China from 2000 to 2014: A Systematic Review and Meta-Analysis. *BioMed research international* 2015; **2015**: 762820.
6. Ishizaka N, Ishizaka Y, Toda A, Tani M, Koike K, Yamakado M *et al*. Changes in waist circumference and body mass index in relation to changes in serum uric acid in Japanese individuals. *The Journal of rheumatology* 2010; **37**(2): 410-6.
7. Chen MY, Zhao CC, Li TT, Zhu Y, Yu TP, Bao YQ *et al*. Serum uric acid levels are associated with obesity but not cardio-cerebrovascular events in Chinese inpatients with type 2 diabetes. *Scientific reports* 2017; **7**: 40009.
8. Dai X, Yuan J, Yao P, Yang B, Gui L, Zhang X *et al*. Association between serum uric acid and the metabolic syndrome among a middle- and old-age Chinese population. *European journal of epidemiology* 2013; **28**(8): 669-76.
9. Johnson RJ, Lanaspas MA, Gaucher EA. Uric acid: a danger signal from the RNA world that may have a role in the epidemic of obesity, metabolic syndrome, and cardiorenal disease: evolutionary considerations. *Seminars in nephrology* 2011; **31**(5): 394-9.
10. Ali N, Perveen R, Rahman S, Mahmood S, Rahman S, Islam S. Prevalence of hyperuricemia and the relationship between serum uric acid and obesity: A study on Bangladeshi adults. 2018; **13**(11): e0206850.
11. Yang C, Yang S, Feng C, Zhang C, Xu W, Zhang L *et al*. Associations of hyperuricemia and obesity with remission of nonalcoholic fatty liver disease among Chinese men: A retrospective cohort study. *PloS one* 2018; **13**(2): e0192396.
12. Sui X, Church TS, Meriwether RA, Lobelo F, Blair SN. Uric acid and the development of metabolic

- 1  
2  
3 syndrome in women and men. *Metabolism: clinical and experimental* 2008; **57**(6): 845-52.  
4  
5  
6 13. You L, Liu A, Wuyun G, Wu H, Wang P. Prevalence of hyperuricemia and the relationship  
7 between serum uric acid and metabolic syndrome in the Asian Mongolian area. *Journal of*  
8 *atherosclerosis and thrombosis* 2014; **21**(4): 355-65.  
9  
10 14. WHO. Appropriate body-mass index for Asian populations and its implications for policy and  
11 intervention strategies. *Lancet* 2004; **363**(9403): 157-63.  
12  
13 15. Li MF, Ren Y, Zhao CC, Zhang R, Li LX, Liu F *et al.* Prevalence and clinical characteristics of  
14 lower limb atherosclerotic lesions in newly diagnosed patients with ketosis-onset diabetes: a  
15 cross-sectional study. *Diabetology & metabolic syndrome* 2014; **6**: 71.  
16  
17 16. Buzkova P, Brown ER, John-Stewart GC. Longitudinal data analysis for generalized linear  
18 models under participant-driven informative follow-up: an application in maternal health  
19 epidemiology. *American journal of epidemiology* 2010; **171**(2): 189-97.  
20  
21 17. Habibzadeh F, Habibzadeh P, Yadollahie M. On determining the most appropriate test cut-off  
22 value: the case of tests with continuous results. *Biochemia medica* 2016; **26**(3): 297-307.  
23  
24 18. Remedios C, Shah M, Bhasker AG, Lakdawala M. Hyperuricemia: a reality in the Indian obese.  
25 *Obesity surgery* 2012; **22**(6): 945-8.  
26  
27 19. Uaratanawong S, Suraamornkul S, Angkeaw S, Uaratanawong R. Prevalence of hyperuricemia  
28 in Bangkok population. *Clinical rheumatology* 2011; **30**(7): 887-93.  
29  
30 20. Ford DK, Demos AM. Serum Uric Acid Levels of Healthy Caucasian, Chinese and Haida Indian  
31 Males in British Columbia. *Canadian Medical Association journal* 1964; **90**: 1295-7.  
32  
33 21. Kuwabara M, Kuwabara R, Hisatome I, Niwa K, Roncal-Jimenez CA, Bjornstad P *et*  
34 *al.* "Metabolically Healthy" Obesity and Hyperuricemia Increase Risk for Hypertension and  
35 Diabetes: 5-year Japanese Cohort Study. *Obesity* 2017; **25**(11): 1997-2008.  
36  
37 22. Zhang N, Chang Y, Guo X, Chen Y, Ye N, Sun Y. A Body Shape Index and Body Roundness  
38 Index: Two new body indices for detecting association between obesity and hyperuricemia in  
39 rural area of China. *European journal of internal medicine* 2016; **29**: 32-6.  
40  
41 23. Matsuura F, Yamashita S, Nakamura T, Nishida M, Nozaki S, Funahashi T *et al.* Effect of  
42 visceral fat accumulation on uric acid metabolism in male obese subjects: visceral fat obesity  
43 is linked more closely to overproduction of uric acid than subcutaneous fat obesity.  
44 *Metabolism: clinical and experimental* 1998; **47**(8): 929-33.  
45  
46 24. Han T, Meng X, Shan R, Zi T, Li Y, Ma H *et al.* Temporal relationship between hyperuricemia  
47 and obesity, and its association with future risk of type 2 diabetes. *International journal of*  
48 *obesity (2005)* 2018; **42**(7): 1336-1344.  
49  
50 25. Fabregat I, Revilla E, Machado A. Short-term control of the pentose phosphate cycle by  
51 insulin could be modulated by the NADPH/NADP ratio in rat adipocytes and hepatocytes.  
52 *Biochemical and biophysical research communications* 1987; **146**(2): 920-5.  
53  
54  
55  
56  
57  
58  
59  
60

- 1
  - 2
  - 3
  - 4
  - 5
  - 6
  - 7
  - 8
  - 9
  - 10
  - 11
  - 12
  - 13
  - 14
  - 15
  - 16
  - 17
  - 18
  - 19
  - 20
  - 21
  - 22
  - 23
  - 24
  - 25
  - 26
  - 27
  - 28
  - 29
  - 30
  - 31
  - 32
  - 33
  - 34
  - 35
  - 36
  - 37
  - 38
  - 39
  - 40
  - 41
  - 42
  - 43
  - 44
  - 45
  - 46
  - 47
  - 48
  - 49
  - 50
  - 51
  - 52
  - 53
  - 54
  - 55
  - 56
  - 57
  - 58
  - 59
  - 60
26. Fox IH. Metabolic basis for disorders of purine nucleotide degradation. *Metabolism: clinical and experimental* 1981; **30**(6): 616-34.
27. Examination Committee of Criteria for 'Obesity Disease' in J, Japan Society for the Study of O. New criteria for 'obesity disease' in Japan. *Circulation journal : official journal of the Japanese Circulation Society* 2002; **66**(11): 987-92.
28. Oka R, Miura K, Sakurai M, Nakamura K, Yagi K, Miyamoto S *et al*. Comparison of waist circumference with body mass index for predicting abdominal adipose tissue. *Diabetes research and clinical practice* 2009; **83**(1): 100-5.
29. Tanaka K, Ogata S, Tanaka H, Omura K, Honda C, Hayakawa K. The relationship between body mass index and uric acid: a study on Japanese adult twins. *Environmental health and preventive medicine* 2015; **20**(5): 347-53.
30. Wang H, Wang L, Xie R, Dai W, Gao C, Shen P *et al*. Association of Serum Uric Acid with Body Mass Index: A Cross-Sectional Study from Jiangsu Province, China. *Iranian journal of public health* 2014; **43**(11): 1503-9.
31. Jaipakdee J, Jiamjarasrangsri W, Lohsoonthorn V, Lertmaharit S. Prevalence of metabolic syndrome and its association with serum uric acid levels in Bangkok Thailand. *The Southeast Asian journal of tropical medicine and public health* 2013; **44**(3): 512-22.
32. Rathmann W, Haastert B, Icks A, Giani G, Roseman JM. Ten-year change in serum uric acid and its relation to changes in other metabolic risk factors in young black and white adults: the CARDIA study. *European journal of epidemiology* 2007; **22**(7): 439-45.
33. Nohara Y, Kai E. Health checkup and telemedical intervention program for preventive medicine in developing countries: verification study. 2015; **17**(1): e2.
34. Bardin T, Richette P. Definition of hyperuricemia and gouty conditions. *Current opinion in rheumatology* 2014; **26**(2): 186-91.
35. Mongioi LM, Condorelli RA, Barbagallo F, Cannarella R, La Vignera S, Calogero AE. Accuracy of the Low-Dose ACTH Stimulation Test for Adrenal Insufficiency Diagnosis: A Re-Assessment of the Cut-Off Value. *Journal of clinical medicine* 2019; **8**(6).
36. Taninaga J, Nishiyama Y. Prediction of future gastric cancer risk using a machine learning algorithm and comprehensive medical check-up data: A case-control study. 2019; **9**(1): 12384.

**Tables and Figure legends:**

**Table 1.** Baseline characteristics and comparison between obesity and non-obesity participants.

**Table 2.** The prevalence of obesity by gender, age of checkup stratified by baseline SUA.

**Table3.** Relationship between risk factors and risk of obesity in the models.

**Table 4.** Relationship between risk factors and risk of obesity in the models stratified by gender and age group.

**Figure 1.** Location of Guangdong Second Provincial General Hospital (Guangzhou, Guangdong, China) and the prevalence of obesity by different years stratified by baseline SUA.

**Figure 2.** Flow diagram showing selection process of participants in our study.

**Supplemental data:**

**Supplementary Figure1.** The ROC curves showing the relationship between SUA and risk of obesity stratified by gender and different times of medical checkups.

**Supplementary Figure2.** The ROC curves showing the relationship between SUA and risk of obesity stratified by gender and different years of medical checkups (from 2010 to 2018).

**Table 1.** Baseline characteristics and comparison between obesity and non-obesity participants.

| Characteristics     | All patients   | Obesity <sup>a</sup> | Non-obesity    | <i>p</i> -value <sup>b</sup> |
|---------------------|----------------|----------------------|----------------|------------------------------|
|                     | n=15959        | n=1227               | n=14732        |                              |
| SUA (μmol/L) [SD]   | 367.05 (97.97) | 434.95 (97.65)       | 361.32 (95.82) | <0.001                       |
| Age (years) [SD]    | 37.38 (13.27)  | 40.40 (13.40)        | 37.13 (13.23)  | <0.001                       |
| Male [n, (%)]       | 10023 (62.8)   | 1012 (82.5)          | 9011 (61.2)    | <0.001                       |
| SBP (mmHg) [SD]     | 121.09 (15.85) | 131.78 (16.47)       | 120.19 (15.47) | <0.001                       |
| DBP (mmHg) [SD]     | 73.84 (10.31)  | 81.16 (11.41)        | 73.23 (9.97)   | <0.001                       |
| TC (mmol/L) [SD]    | 4.88 (0.93)    | 5.19 (0.95)          | 4.86 (0.93)    | <0.001                       |
| TG (mmol/L) [SD]    | 1.46 (1.10)    | 2.18 (1.49)          | 1.40 (1.04)    | <0.001                       |
| HDL-c (mmol/L) [SD] | 1.26 (0.25)    | 1.15 (0.22)          | 1.27 (0.25)    | <0.001                       |
| LDL-c (mmol/L) [SD] | 2.92 (0.78)    | 3.20 (0.80)          | 2.90 (0.77)    | <0.001                       |
| FPG (mmol/L) [SD]   | 5.06 (1.04)    | 5.51 (1.61)          | 5.03 (0.97)    | <0.001                       |
| BUN (mmol/L) [SD]   | 4.78 (1.25)    | 5.07 (1.30)          | 4.75 (1.24)    | <0.001                       |
| CR (mmol/L) [SD]    | 94.57 (17.12)  | 100.05 (16.17)       | 94.11 (17.12)  | <0.001                       |

**Note:** Continuous variables are presented as the means (standard derivation); SUA, serum uric acid; SBP, systolic blood pressure; DBP, diastolic blood pressure; TC, total cholesterol; TG, triglycerides; HDL-c, high-density lipoprotein cholesterol; LDL-c, low-density lipoprotein cholesterol; FPG, fasting plasma glucose; BUN, blood urea nitrogen; Cr, creatinine.

<sup>a</sup>Obesity was defined as body mass index (BMI)  $\geq 28.0$  kg/m<sup>2</sup>.

<sup>b</sup>*p* value for the difference of variables between the two data sets based on independent sample t-test or chi-square test.

\*The average number of health checkup for each participant is 2.62.

**Table 2.** The prevalence of obesity by gender, age of checkup stratified by baseline SUA.

| Variable         | Obesity prevalence, n (%) <sup>a</sup> |                 |         |
|------------------|----------------------------------------|-----------------|---------|
|                  | Normal SUA                             | High SUA        | P-value |
| <b>Gender</b>    |                                        |                 |         |
| Male             | 357/5280 (6.8)                         | 570/3768 (15.1) | <0.001  |
| Female           | 104/4431 (2.3)                         | 97/937 (10.3)   | <0.001  |
| <b>Age group</b> |                                        |                 |         |
| <30              | 88/3509 (2.5)                          | 168/1643 (10.2) | <0.001  |
| 30-44            | 182/3736 (4.9)                         | 309/1692 (18.3) | <0.001  |
| 45-59            | 121/1727 (7.0)                         | 125/865 (14.5)  | <0.001  |
| 60-74            | 54/606 (8.9)                           | 53/378 (14.0)   | <0.001  |
| ≥75              | 11/134 (8.2)                           | 12/127 (9.4)    | <0.001  |
| <b>Overall</b>   | 456/9711 (4.6)                         | 669/4705 (14.2) | <0.001  |

level was defined as the SUA greater than 420 mmol/L in men and greater than 360 mmol/L in women, while the others are normal.

<sup>a</sup>Obesity prevalence = (n of obesity) / (total participants).

**Table 3.** Relationship between risk factors and risk of obesity in the models.

| Variable                    | Model 1 <sup>c</sup>                  |         | Model 2 <sup>d</sup>                  |         |
|-----------------------------|---------------------------------------|---------|---------------------------------------|---------|
|                             | OR <sup>a</sup> (95%CI <sup>b</sup> ) | p-value | OR <sup>a</sup> (95%CI <sup>b</sup> ) | p-value |
| <b>Continuous analysis</b>  |                                       |         |                                       |         |
| <b>SUA (μmol/L)</b>         |                                       |         |                                       |         |
| Per-1                       | 1.01 (1.01,1.02)                      | <0.001  | 1.01 (1.01,1.02)                      | <0.001  |
| Per-SD                      | 1.84 (1.77,1.90)                      | <0.001  | 1.85 (1.77,1.91)                      | <0.001  |
| <b>Gender [n, (%)]</b>      |                                       |         |                                       |         |
| Female                      | Reference                             |         | Reference                             |         |
| Male                        | 1.27 (1.16,1.39)                      | <0.001  | 1.45 (1.32,1.60)                      | <0.001  |
| Age (years)                 | 1.02 (1.02, 1.03)                     | <0.001  | 1.01 (1.01, 1.02)                     | <0.001  |
| <b>Categorical analysis</b> |                                       |         |                                       |         |
| <b>SUA<sup>e</sup></b>      |                                       |         |                                       |         |
| Normal SUA                  | Reference                             |         | Reference                             |         |
| High SUA                    | 2.02 (1.84, 2.23)                     | <0.001  | 2.57 (2.31, 2.87)                     | <0.001  |
| <b>Gender</b>               |                                       |         |                                       |         |
| Female                      | Reference                             |         | Reference                             |         |
| Male                        | 1.25 (1.09, 1.43)                     | 0.002   | 1.69 (1.59, 1.79)                     | <0.001  |
| <b>Age group</b>            |                                       |         |                                       |         |
| <30                         | Reference                             |         | Reference                             |         |
| 30-44                       | 1.38 (1.14, 1.66)                     | 0.001   | 1.73 (1.54, 1.91)                     | <0.001  |
| 45-59                       | 1.07 (0.89, 1.30)                     | 0.475   | 1.94 (1.72, 2.18)                     | <0.001  |
| 60-74                       | 1.12 (0.90, 1.38)                     | 0.314   | 1.99 (1.72, 2.32)                     | <0.001  |
| ≥75                         | 0.95 (0.71, 1.27)                     | 0.718   | 1.86(1.50, 2.31)                      | <0.001  |

**Note:** <sup>a</sup>OR: odds ratio; <sup>b</sup>CI: confidence interval.

<sup>c</sup>Model 1 was adjusted for the variables of SBP, DBP, TC, TG, HDL-c, LDL-c, FPG, BUN, CR based on the first time of medical checkup participants by using multivariate logistic regression model (LRM).

<sup>d</sup>Model 2 was adjusted for the variables of repeated times or years of medical checkup, SBP, DBP, TC, TG, HDL-c, LDL-c, FPG, BUN, CR based on all medical checkup participants by using generalized estimation equation model (GEE).

<sup>e</sup>High SUA level was defined as the SUA greater than 420 mmol/L in men and greater than 360 mmol/L in women, while the others are normal.



**Table 4.** Relationship between risk factors and risk of obesity in the models stratified by gender and age group.

| Variable                     | Generalized estimation equation model (GEE) <sup>c</sup> |                |                                           |                |
|------------------------------|----------------------------------------------------------|----------------|-------------------------------------------|----------------|
|                              | Male                                                     |                | Female                                    |                |
| Gender                       | <i>OR<sup>a</sup> (95%CI<sup>b</sup>)</i>                | <i>p-value</i> | <i>OR<sup>a</sup> (95%CI<sup>b</sup>)</i> | <i>p-value</i> |
| <b>Continuous variable</b>   |                                                          |                |                                           |                |
| <b>SUA (μmol/L)</b>          |                                                          |                |                                           |                |
| Per-1                        | 1.01 (1.01,1.02)                                         | <0.001         | 1.01 (1.01,1.02)                          | <0.001         |
| Per-SD                       | 1.70 (1.64,1.77)                                         | <0.001         | 2.35 (2.16,2.55)                          | <0.001         |
| <b>Categorical variables</b> |                                                          |                |                                           |                |
| <b>SUA</b>                   |                                                          |                |                                           |                |
| Normal SUA                   | Reference                                                |                | Reference                                 |                |
| High SUA                     | 2.40 (2.23,2.59)                                         | <0.001         | 3.79 (3.23,4.45)                          | <0.001         |
| Age group                    | Youth (<65 year)                                         |                | Elderly (≥65 year)                        |                |
|                              | <i>OR<sup>a</sup> (95%CI<sup>b</sup>)</i>                | <i>p-value</i> | <i>OR<sup>a</sup> (95%CI<sup>b</sup>)</i> | <i>p-value</i> |
| <b>Continuous variable</b>   |                                                          |                |                                           |                |
| <b>SUA (μmol/L)</b>          |                                                          |                |                                           |                |
| Per-1                        | 1.01 (1.01,1.02)                                         | <0.001         | 1.00 (1.00,1.01)                          | <0.001         |
| Per-SD                       | 1.87 (1.80,1.94)                                         | <0.001         | 1.48 (1.34,1.62)                          | <0.001         |
| <b>Categorical variables</b> |                                                          |                |                                           |                |
| <b>SUA</b>                   |                                                          |                |                                           |                |
| Normal SUA                   | Reference                                                |                | Reference                                 |                |
| High SUA                     | 2.78 (2.58,2.99)                                         | <0.001         | 1.99 (1.63,2.43)                          | <0.001         |

**Note:** <sup>a</sup>OR: odds ratio; <sup>b</sup>CI: confidence interval.

<sup>c</sup>Model was adjusted for the variables of repeated times or years of medical checkup, age, sex, SBP, DBP, TC, TG, HDL-c, LDL-c, FPG, BUN, CR based on all medical checkup participants by using generalized estimation equation model (GEE).

<sup>e</sup>High SUA level was defined as the SUA greater than 420 mmol/L in men and greater than 360 mmol/L in women, while the others are normal.

1  
2  
3  
4  
5  
6  
7  
8  
9  
10  
11  
12  
13  
14  
15  
16  
17  
18  
19  
20  
21  
22  
23  
24  
25  
26  
27  
28  
29  
30  
31  
32  
33  
34  
35  
36  
37  
38  
39  
40  
41  
42  
43  
44  
45  
46  
47  
48  
49  
50  
51  
52  
53  
54  
55  
56  
57  
58  
59  
60

For peer review only

1  
2  
3  
4  
5  
6  
7  
8  
9  
10  
11  
12  
13  
14  
15  
16  
17  
18  
19  
20  
21  
22  
23  
24  
25  
26  
27  
28  
29  
30  
31  
32  
33  
34  
35  
36  
37  
38  
39  
40  
41  
42  
43  
44  
45  
46  
47  
48  
49  
50  
51  
52  
53  
54  
55  
56  
57  
58  
59  
60



240x140mm (300 x 300 DPI)

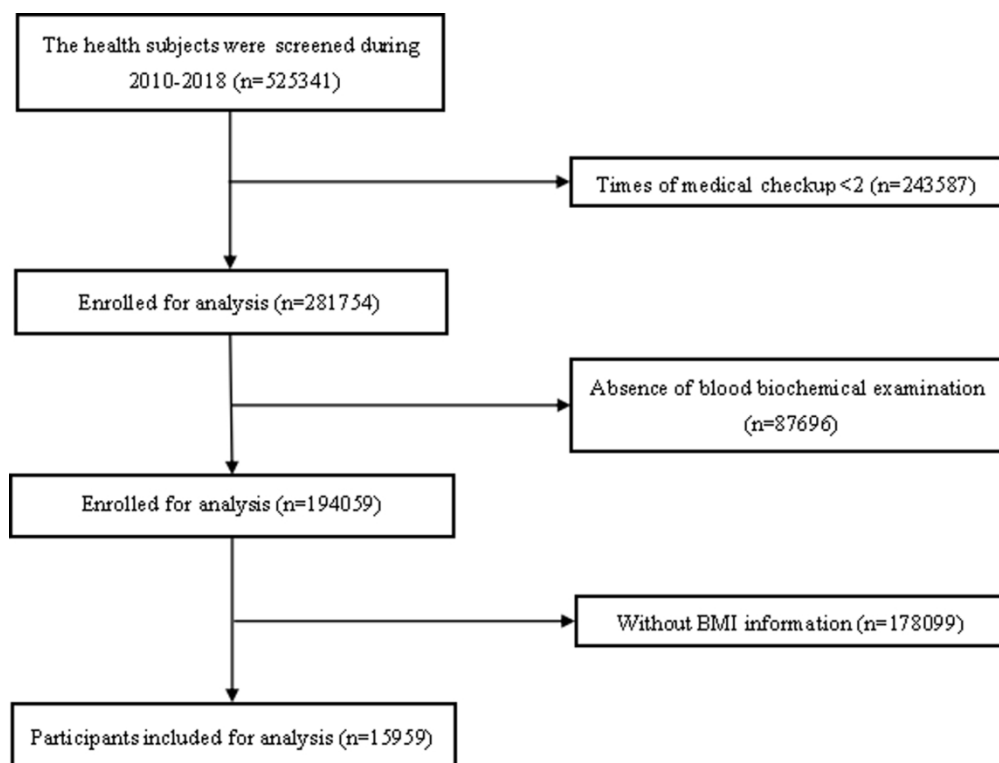

155x117mm (300 x 300 DPI)

1  
2  
3  
4  
5  
6  
7  
8  
9  
10  
11  
12  
13  
14  
15  
16  
17  
18  
19  
20  
21  
22  
23  
24  
25  
26  
27  
28  
29  
30  
31  
32  
33  
34  
35  
36  
37  
38  
39  
40  
41  
42  
43  
44  
45  
46  
47  
48  
49  
50  
51  
52  
53  
54  
55  
56  
57  
58  
59  
60



127x63mm (300 x 300 DPI)



127x64mm (300 x 300 DPI)

## STROBE Statement—checklist of items that should be included in reports of observational studies

|                              | Item No | Recommendation                                                                                                                                                                                                                                                                                                                                                                                                                                                                 | Page No |
|------------------------------|---------|--------------------------------------------------------------------------------------------------------------------------------------------------------------------------------------------------------------------------------------------------------------------------------------------------------------------------------------------------------------------------------------------------------------------------------------------------------------------------------|---------|
| <b>Title and abstract</b>    | 1       | (a) Indicate the study's design with a commonly used term in the title or the abstract                                                                                                                                                                                                                                                                                                                                                                                         | 1-4     |
|                              |         | (b) Provide in the abstract an informative and balanced summary of what was done and what was found                                                                                                                                                                                                                                                                                                                                                                            | 1-4     |
| <b>Introduction</b>          |         |                                                                                                                                                                                                                                                                                                                                                                                                                                                                                |         |
| Background/rationale         | 2       | Explain the scientific background and rationale for the investigation being reported                                                                                                                                                                                                                                                                                                                                                                                           | 6       |
| Objectives                   | 3       | State specific objectives, including any prespecified hypotheses                                                                                                                                                                                                                                                                                                                                                                                                               | 7       |
| <b>Methods</b>               |         |                                                                                                                                                                                                                                                                                                                                                                                                                                                                                |         |
| Study design                 | 4       | Present key elements of study design early in the paper                                                                                                                                                                                                                                                                                                                                                                                                                        | 7       |
| Setting                      | 5       | Describe the setting, locations, and relevant dates, including periods of recruitment, exposure, follow-up, and data collection                                                                                                                                                                                                                                                                                                                                                | 7       |
| Participants                 | 6       | (a) <i>Cohort study</i> —Give the eligibility criteria, and the sources and methods of selection of participants. Describe methods of follow-up<br><br><i>Case-control study</i> —Give the eligibility criteria, and the sources and methods of case ascertainment and control selection. Give the rationale for the choice of cases and controls<br><br><i>Cross-sectional study</i> —Give the eligibility criteria, and the sources and methods of selection of participants | 7       |
|                              |         | (b) <i>Cohort study</i> —For matched studies, give matching criteria and number of exposed and unexposed<br><br><i>Case-control study</i> —For matched studies, give matching criteria and the number of controls per case                                                                                                                                                                                                                                                     | 7       |
| Variables                    | 7       | Clearly define all outcomes, exposures, predictors, potential confounders, and effect modifiers. Give diagnostic criteria, if applicable                                                                                                                                                                                                                                                                                                                                       | 7-8     |
| Data sources/<br>measurement | 8*      | For each variable of interest, give sources of data and details of methods of assessment (measurement). Describe comparability of assessment methods if there is more than one group                                                                                                                                                                                                                                                                                           | 7-8     |
| Bias                         | 9       | Describe any efforts to address potential sources of bias                                                                                                                                                                                                                                                                                                                                                                                                                      | 7-8     |
| Study size                   | 10      | Explain how the study size was arrived at                                                                                                                                                                                                                                                                                                                                                                                                                                      | 7-8     |

|    |                        |    |                                                                                                                              |
|----|------------------------|----|------------------------------------------------------------------------------------------------------------------------------|
| 1  |                        |    |                                                                                                                              |
| 2  | Quantitative variables | 11 | Explain how quantitative variables were handled in the analyses. If applicable, describe which groupings were chosen and why |
| 3  |                        |    |                                                                                                                              |
| 4  |                        |    |                                                                                                                              |
| 5  | Statistical methods    | 12 | (a) Describe all statistical methods, including those used to control for confounding                                        |
| 6  |                        |    |                                                                                                                              |
| 7  |                        |    |                                                                                                                              |
| 8  |                        |    |                                                                                                                              |
| 9  |                        |    | (b) Describe any methods used to examine subgroups and interactions                                                          |
| 10 |                        |    |                                                                                                                              |
| 11 |                        |    | (c) Explain how missing data were addressed                                                                                  |
| 12 |                        |    |                                                                                                                              |
| 13 |                        |    | (d) <i>Cohort study</i> —If applicable, explain how loss to follow-up was addressed                                          |
| 14 |                        |    |                                                                                                                              |
| 15 |                        |    |                                                                                                                              |
| 16 |                        |    | <i>Case-control study</i> —If applicable, explain how matching of cases and controls was addressed                           |
| 17 |                        |    |                                                                                                                              |
| 18 |                        |    |                                                                                                                              |
| 19 |                        |    |                                                                                                                              |
| 20 |                        |    | <i>Cross-sectional study</i> —If applicable, describe analytical methods taking account of sampling strategy                 |
| 21 |                        |    |                                                                                                                              |
| 22 |                        |    |                                                                                                                              |
| 23 |                        |    | (e) Describe any sensitivity analyses                                                                                        |
| 24 |                        |    |                                                                                                                              |
| 25 |                        |    |                                                                                                                              |
| 26 |                        |    |                                                                                                                              |
| 27 |                        |    |                                                                                                                              |
| 28 |                        |    |                                                                                                                              |
| 29 |                        |    |                                                                                                                              |
| 30 |                        |    |                                                                                                                              |
| 31 |                        |    |                                                                                                                              |
| 32 |                        |    |                                                                                                                              |
| 33 |                        |    |                                                                                                                              |
| 34 |                        |    |                                                                                                                              |
| 35 |                        |    |                                                                                                                              |
| 36 |                        |    |                                                                                                                              |
| 37 |                        |    |                                                                                                                              |
| 38 |                        |    |                                                                                                                              |
| 39 |                        |    |                                                                                                                              |
| 40 |                        |    |                                                                                                                              |
| 41 |                        |    |                                                                                                                              |
| 42 |                        |    |                                                                                                                              |
| 43 |                        |    |                                                                                                                              |
| 44 |                        |    |                                                                                                                              |
| 45 |                        |    |                                                                                                                              |
| 46 |                        |    |                                                                                                                              |
| 47 |                        |    |                                                                                                                              |
| 48 |                        |    |                                                                                                                              |
| 49 |                        |    |                                                                                                                              |
| 50 |                        |    |                                                                                                                              |
| 51 |                        |    |                                                                                                                              |
| 52 |                        |    |                                                                                                                              |
| 53 |                        |    |                                                                                                                              |
| 54 |                        |    |                                                                                                                              |
| 55 |                        |    |                                                                                                                              |
| 56 |                        |    |                                                                                                                              |
| 57 |                        |    |                                                                                                                              |
| 58 |                        |    |                                                                                                                              |
| 59 |                        |    |                                                                                                                              |
| 60 |                        |    |                                                                                                                              |

Continued on next page



1  
2  
3  
4  
5  
6  
7  
8  
9  
10  
11  
12  
13  
14  
15  
16  
17  
18  
19  
20  
21  
22  
23  
24  
25  
26  
27  
28  
29  
30  
31  
32  
33  
34  
35  
36  
37  
38  
39  
40  
41  
42  
43  
44  
45  
46  
47  
48  
49  
50  
51  
52  
53  
54  
55  
56  
57  
58  
59  
60**Results**

|                          |         |                                                                                                                                                                                                              |       |
|--------------------------|---------|--------------------------------------------------------------------------------------------------------------------------------------------------------------------------------------------------------------|-------|
| Participants             | 13<br>* | (a) Report numbers of individuals at each stage of study—eg numbers potentially eligible, examined for eligibility, confirmed eligible, included in the study, completing follow-up, and analysed            | 9     |
|                          |         | (b) Give reasons for non-participation at each stage                                                                                                                                                         | 9     |
|                          |         | (c) Consider use of a flow diagram                                                                                                                                                                           | 9     |
| Descriptive data         | 14<br>* | (a) Give characteristics of study participants (eg demographic, clinical, social) and information on exposures and potential confounders                                                                     | 9-10  |
|                          |         | (b) Indicate number of participants with missing data for each variable of interest                                                                                                                          | 9-10  |
|                          |         | (c) <i>Cohort study</i> —Summarise follow-up time (eg, average and total amount)                                                                                                                             | 9-10  |
| Outcome data             | 15<br>* | <i>Cohort study</i> —Report numbers of outcome events or summary measures over time                                                                                                                          | 9-10  |
|                          |         | <i>Case-control study</i> —Report numbers in each exposure category, or summary measures of exposure                                                                                                         | 9-10  |
|                          |         | <i>Cross-sectional study</i> —Report numbers of outcome events or summary measures                                                                                                                           | 9-10  |
| Main results             | 16      | (a) Give unadjusted estimates and, if applicable, confounder-adjusted estimates and their precision (eg, 95% confidence interval). Make clear which confounders were adjusted for and why they were included | 9-10  |
|                          |         | (b) Report category boundaries when continuous variables were categorized                                                                                                                                    | 9-10  |
|                          |         | (c) If relevant, consider translating estimates of relative risk into absolute risk for a meaningful time period                                                                                             | 9-10  |
| Other analyses           | 17      | Report other analyses done—eg analyses of subgroups and interactions, and sensitivity analyses                                                                                                               | 9-10  |
| <b>Discussion</b>        |         |                                                                                                                                                                                                              |       |
| Key results              | 18      | Summarise key results with reference to study objectives                                                                                                                                                     | 10    |
| Limitations              | 19      | Discuss limitations of the study, taking into account sources of potential bias or imprecision. Discuss both direction and magnitude of any potential bias                                                   | 12    |
| Interpretation           | 20      | Give a cautious overall interpretation of results considering objectives, limitations, multiplicity of analyses, results from similar studies, and other relevant evidence                                   | 13    |
| Generalisability         | 21      | Discuss the generalisability (external validity) of the study results                                                                                                                                        | 10-13 |
| <b>Other information</b> |         |                                                                                                                                                                                                              |       |
| Funding                  | 22      | Give the source of funding and the role of the funders for the present study and, if applicable, for the original study on which the present article is based                                                | 14    |

1  
2  
3  
4 \*Give information separately for cases and controls in case-control studies and, if applicable, for exposed and  
5 unexposed groups in cohort and cross-sectional studies.  
6  
7  
8

9  
10 **Note:** An Explanation and Elaboration article discusses each checklist item and gives methodological background and  
11 published examples of transparent reporting. The STROBE checklist is best used in conjunction with this article (freely  
12 available on the Web sites of PLoS Medicine at <http://www.plosmedicine.org/>, Annals of Internal Medicine at  
13 <http://www.annals.org/>, and Epidemiology at <http://www.epidem.com/>). Information on the STROBE Initiative is  
14 available at [www.strobe-statement.org](http://www.strobe-statement.org).  
15  
16  
17  
18  
19  
20  
21  
22  
23  
24  
25  
26  
27  
28  
29  
30  
31  
32  
33  
34  
35  
36  
37  
38  
39  
40  
41  
42  
43  
44  
45  
46  
47  
48  
49  
50  
51  
52  
53  
54  
55  
56  
57  
58  
59  
60

For peer review only

# BMJ Open

## Association between serum uric acid and obesity in Chinese adults: A nine-year longitudinal data analysis

|                                 |                                                                                                                                                                                                                                                                                                                                                                                                                                                                                                                                                                                                                                                                                                                                                                                                                                                                                                                                                                                                                                                                                                                                                                                                                                                                                                                                          |
|---------------------------------|------------------------------------------------------------------------------------------------------------------------------------------------------------------------------------------------------------------------------------------------------------------------------------------------------------------------------------------------------------------------------------------------------------------------------------------------------------------------------------------------------------------------------------------------------------------------------------------------------------------------------------------------------------------------------------------------------------------------------------------------------------------------------------------------------------------------------------------------------------------------------------------------------------------------------------------------------------------------------------------------------------------------------------------------------------------------------------------------------------------------------------------------------------------------------------------------------------------------------------------------------------------------------------------------------------------------------------------|
| Journal:                        | <i>BMJ Open</i>                                                                                                                                                                                                                                                                                                                                                                                                                                                                                                                                                                                                                                                                                                                                                                                                                                                                                                                                                                                                                                                                                                                                                                                                                                                                                                                          |
| Manuscript ID                   | bmjopen-2020-041919.R4                                                                                                                                                                                                                                                                                                                                                                                                                                                                                                                                                                                                                                                                                                                                                                                                                                                                                                                                                                                                                                                                                                                                                                                                                                                                                                                   |
| Article Type:                   | Original research                                                                                                                                                                                                                                                                                                                                                                                                                                                                                                                                                                                                                                                                                                                                                                                                                                                                                                                                                                                                                                                                                                                                                                                                                                                                                                                        |
| Date Submitted by the Author:   | 14-Nov-2020                                                                                                                                                                                                                                                                                                                                                                                                                                                                                                                                                                                                                                                                                                                                                                                                                                                                                                                                                                                                                                                                                                                                                                                                                                                                                                                              |
| Complete List of Authors:       | Zeng, Jie; Guangdong Second Provincial General Hospital, Center for Clinical Epidemiology and Methodology<br>Lawrence, Wayne R; University at Albany State University of New York, Department of Epidemiology and Biostatistics<br>Yang, Jun; Jinan University, Institute for Environmental and Climate Research<br>Tian, Junzhang; Guangdong Second Provincial General Hospital, Center for Clinical Epidemiology and Methodology<br>Li, Cheng; Guangdong Second Provincial General Hospital, Guangdong Traditional Medical and Sports Injury Rehabilitation Research Institute<br>Lian, Wanmin; Guangdong Second Provincial General Hospital, Center for Information<br>He, Jingjun; Guangdong Second Provincial General Hospital, Center for Health Management and Examination<br>Qu, Hongying; Guangdong Second Provincial General Hospital, Center for Clinical Epidemiology and Methodology<br>Wang, Xiaojie; Guangdong Second Provincial General Hospital, Center for Clinical Epidemiology and Methodology<br>Liu, Hongmei; Guangdong Second Provincial General Hospital, Department of Ultrasound<br>Li, Guanming; Guangdong Second Provincial General Hospital, Center for Clinical Epidemiology and Methodology<br>Li, Guowei; Guangdong Second Provincial General Hospital, Center for Clinical Epidemiology and Methodology |
| <b>Primary Subject Heading</b>: | Epidemiology                                                                                                                                                                                                                                                                                                                                                                                                                                                                                                                                                                                                                                                                                                                                                                                                                                                                                                                                                                                                                                                                                                                                                                                                                                                                                                                             |
| Secondary Subject Heading:      | Rheumatology, Public health                                                                                                                                                                                                                                                                                                                                                                                                                                                                                                                                                                                                                                                                                                                                                                                                                                                                                                                                                                                                                                                                                                                                                                                                                                                                                                              |
| Keywords:                       | Public health < INFECTIOUS DISEASES, Risk management < HEALTH SERVICES ADMINISTRATION & MANAGEMENT, Epidemiology < TROPICAL MEDICINE                                                                                                                                                                                                                                                                                                                                                                                                                                                                                                                                                                                                                                                                                                                                                                                                                                                                                                                                                                                                                                                                                                                                                                                                     |
|                                 |                                                                                                                                                                                                                                                                                                                                                                                                                                                                                                                                                                                                                                                                                                                                                                                                                                                                                                                                                                                                                                                                                                                                                                                                                                                                                                                                          |

SCHOLARONE™  
Manuscripts

1  
2  
3  
4  
5  
6  
7  
8  
9  
10  
11  
12  
13  
14  
15  
16  
17  
18  
19  
20  
21  
22  
23  
24  
25  
26  
27  
28  
29  
30  
31  
32  
33  
34  
35  
36  
37  
38  
39  
40  
41  
42  
43  
44  
45  
46  
47  
48  
49  
50  
51  
52  
53  
54  
55  
56  
57  
58  
59  
60



I, the Submitting Author has the right to grant and does grant on behalf of all authors of the Work (as defined in the below author licence), an exclusive licence and/or a non-exclusive licence for contributions from authors who are: i) UK Crown employees; ii) where BMJ has agreed a CC-BY licence shall apply, and/or iii) in accordance with the terms applicable for US Federal Government officers or employees acting as part of their official duties; on a worldwide, perpetual, irrevocable, royalty-free basis to BMJ Publishing Group Ltd ("BMJ") its licensees and where the relevant Journal is co-owned by BMJ to the co-owners of the Journal, to publish the Work in this journal and any other BMJ products and to exploit all rights, as set out in our [licence](#).

The Submitting Author accepts and understands that any supply made under these terms is made by BMJ to the Submitting Author unless you are acting as an employee on behalf of your employer or a postgraduate student of an affiliated institution which is paying any applicable article publishing charge ("APC") for Open Access articles. Where the Submitting Author wishes to make the Work available on an Open Access basis (and intends to pay the relevant APC), the terms of reuse of such Open Access shall be governed by a Creative Commons licence – details of these licences and which [Creative Commons](#) licence will apply to this Work are set out in our licence referred to above.

Other than as permitted in any relevant BMJ Author's Self Archiving Policies, I confirm this Work has not been accepted for publication elsewhere, is not being considered for publication elsewhere and does not duplicate material already published. I confirm all authors consent to publication of this Work and authorise the granting of this licence.

# Association between serum uric acid and obesity in Chinese adults: A nine-year longitudinal data analysis

Jie Zeng<sup>1,2</sup>, Wayne R. Lawrence<sup>3</sup>, Jun Yang<sup>4</sup>, Junzhang Tian<sup>1</sup>, Cheng Li<sup>5</sup>, Wanmin Lian<sup>6</sup>, Jingjun He<sup>7</sup>, Hongying Qu<sup>1,7</sup>, Xiaojie Wang<sup>1</sup>, Hongmei Liu<sup>2,8</sup>, Guanming Li<sup>1\*</sup>, and Guowei Li<sup>1,9\*</sup>

<sup>1</sup> Center for Clinical Epidemiology and Methodology (CCEM), Guangdong Second Provincial General Hospital, Guangzhou, China.

<sup>2</sup> Institute of Ultrasound in Musculoskeletal Sports Medicine, Guangdong Second Provincial General Hospital, Guangzhou, China.

<sup>3</sup> Department of Epidemiology and Biostatistics, School of Public Health, University at Albany, State University of New York, One University Place, Rensselaer, New York.

<sup>4</sup> Institute for Environmental and Climate Research, Jinan University, Guangzhou, 511443, China.

<sup>5</sup> Guangdong Traditional Medical and Sports Injury Rehabilitation Research Institute, Guangdong Second Provincial General Hospital, Guangzhou, China.

<sup>6</sup> Center for Information, Guangdong Second Provincial General Hospital, Guangzhou, China.

<sup>7</sup> Center for Health Management and Examination, Guangdong Second Provincial General Hospital, Guangzhou, China.

<sup>8</sup> Department of Ultrasound, Guangdong Second Provincial General Hospital, Guangzhou, China.

<sup>9</sup> Department of Health Research Methods, Evidence, and Impact (HEI), McMaster University, Hamilton, ON, Canada.

## \*Corresponding Authors:

### **Guowei Li, PhD**

CCEM, Guangdong Second Provincial General Hospital, Guangzhou 510317, China.

Department of HEI, McMaster University, Hamilton, Canada L8S 4L8

Telephone: 86-020-89169025; Fax: 86-020-89168021

E-mail: liguowei099@126.com

and

### **Guanming Li, MD**

CCEM, Guangdong Second Provincial General Hospital, Guangzhou 510317, China.

Telephone: 86-020-32640264; Fax: 86-020-32640184

E-mail: lywergd@163.com

Word count: 2,953

For peer review only

1  
2  
3  
4  
5  
6  
7  
8  
9  
10  
11  
12  
13  
14  
15  
16  
17  
18  
19  
20  
21  
22  
23  
24  
25  
26  
27  
28  
29  
30  
31  
32  
33  
34  
35  
36  
37  
38  
39  
40  
41  
42  
43  
44  
45  
46  
47  
48  
49  
50  
51  
52  
53  
54  
55  
56  
57  
58  
59  
60

## 1 Abstract

2 **Objectives:** Hyperuricemia has been reported to be significantly associated with risk of obesity.  
3 However, previous studies on the association between serum uric acid (SUA) and body mass  
4 index (BMI) yielded conflicting results. The present study examined the relationship between  
5 SUA and obesity among Chinese adults.

6  
7 **Methods:** Data were collected at Guangdong Second Provincial General Hospital in Guangzhou  
8 City, China between January 2010 and December 2018. Participants with  $\geq 2$  medical checkup  
9 times were included in our analyses. Physical examinations and laboratory measurement variables  
10 were obtained from the medical checkup system. The high SUA level group was classified as  
11 participants with hyperuricemia, and obesity was defined as  $BMI \geq 28 \text{ kg/m}^2$ . Logistic regression  
12 model (LRM) was performed for data at baseline. For all participants, generalized estimation  
13 equation (GEE) model was used to assess the association between SUA and obesity, where the  
14 data were repeatedly measured over the nine-year study period. Subgroup analyses were  
15 performed by gender and age group. We calculated the cut-off values for SUA of obesity using the  
16 receiver operating characteristic curves (ROC) technique.

17  
18 **Results:** A total of 15,959 participants (10,023 males and 5,936 females) were included in this  
19 study, with an average age of 37.38 years (SD: 13.27) and average SUA of  $367.05 \mu\text{mol/L}$  (SD:  
20  $97.97$ ) at baseline, respectively. Finally, 1078 participants developed obesity over the 9-year  
21 period. The prevalence of obesity was approximately 14.2% for high SUA level. In logistic  
22 regression analysis at baseline, we observed a positive association between SUA and risk of  
23 obesity: OR=1.84 (95% CI: 1.77,1.90) for per-SD increase in SUA. Considering repeated  
24 measures over 9-year for all participants in the GEE model, the per-SD OR was 1.85 (95%  
25 CI:1.77,1.91) for SUA and the increased risk of obesity were greater for male (OR=1.45) and  
26 elderly participants (OR=1.01). In subgroup analyses by gender and age, we observed significant  
27 associations between SUA and obesity with higher risk in female (OR=2.35) and young



1  
2  
3  
4 28 participants (OR=1.87) when compared to male (OR=1.70) and elderly participants (OR=1.48).

5  
6 29 The SUA cutoff points for risk of obesity using ROC curves were approximately consistent with  
7  
8 30 the international standard.  
9

10 31

11  
12  
13 32 **Conclusions:** Our study observed higher SUA level was associated with increased risk of obesity.

14  
15 33 More high-quality research is needed to further support these findings.  
16

17 34

18  
19  
20 35 **Keywords:** serum uric acid, obesity, generalized estimation equation model, risk factors, China  
21

22 36

23  
24  
25 37

26  
27  
28 38

29  
30  
31 39

32  
33 40

34  
35  
36 41

37  
38  
39 42

40  
41 43

42  
43  
44 44

45  
46  
47 45

48  
49 46

50  
51 47

52  
53 48

54  
55  
56  
57 49  
58  
59  
60

1  
2  
3  
4 50  
56 51 **Strengths and limitations of this study**  
78  
9 52 ➤ This is the first large long-term medical checkup study to explore the relationship between  
10  
11 53 SUA and obesity in China.12  
13 54 ➤ The study analysis was based on the GEE model which can increase the accuracy of the  
14  
15 55 prediction.16  
17  
18 56 ➤ The results from this study could inform prevention methods for obesity, especially in  
19  
20 57 medically underserved areas where medical service is insufficient.21  
22 58 ➤ The younger screening population in this study may underestimate the increased risk of uric  
23  
24 59 acid among the elderly obese.  
2526  
27 60  
28  
2930 61  
31  
32  
33  
34  
35  
36  
37  
38  
39  
40  
41  
42  
43  
44  
45  
46  
47  
48  
49  
50  
51  
52  
53  
54  
55  
56  
57  
58  
59  
60

## 62 Introduction

63 An individual's health behavior can influence both physical health and ability to recover from an  
64 illness. Annual medical checkup is an example of a positive health behavior, as this preventative  
65 measure is associated with earlier disease detection, greater treatment success, and faster recovery  
66 from a disease <sup>1</sup>. For this reason, medical data obtained from primary care is a useful source as it  
67 includes information on symptoms and health care utilization, all beneficial for use in prediction  
68 analysis. Medical checkup data often includes a variety of diagnostic tests to assess health status  
69 for early detection and disease prevention. Additionally, medical checkup data provides valuable  
70 information on present and past health conditions that are generally difficult to obtain in most  
71 population-based data <sup>2</sup>. More specifically, medical checkup data is a reliable and objective  
72 measure for identifying chronic diseases such as hyperuricemia and obesity.

73  
74 Serum uric acid (SUA) is the final product of purine metabolism in humans, potentially resulting  
75 in hyperuricemia<sup>3,4</sup>. In China, the prevalence of hyperuricemia is 13.3%, with 19.4% for men and  
76 7.9% for women<sup>5</sup>. Additionally, in 2019 the obesity prevalence was nearing 12% in China.  
77 Among obese patients, hyperuricemia is commonly observed. Although changes in obesity was  
78 reported to be independently correlated with changes in uric acid concentration, there might be an  
79 interaction between them as suggested in prior pathophysiological and metabolic studies <sup>6</sup>.  
80 Epidemiological and clinical evidence supports a strong significant positive association between  
81 SUA and obesity in the adult population of China, Japan, India, Pakistan, and Iraq <sup>7</sup>. A  
82 cross-sectional study showed that body mass index (BMI) significantly increases with elevated  
83 SUA among 27,009 middle-aged and elderly Chinese adults <sup>8</sup>. Previous research showed that  
84 hyperuricemia can cause obesity by accelerating hepatic and peripheral lipogenesis<sup>9</sup>. With the  
85 increasing prevalence of obesity among adults with hyperuricemia, it is of public health  
86 importance to evaluate the long-term epidemiological transitions to develop policies centered on  
87 intervention.

88

1  
2  
3  
4 89 Numerous trend analyses have reported the association between SUA and BMI based on  
5  
6 90 short-term survey data in China<sup>10, 11</sup>. However, there remains a gap in evidence regarding the  
7  
8 91 long-term trend for providing estimates on the risks of obesity among Chinese adults during the  
9  
10 92 last two decades. Therefore, the present study aimed to examine the relationship between SUA  
11  
12 93 and risk of obesity using the 9-year medical checkup data among Chinese adults from 2010 to  
13  
14 94 2018.

15  
16 95

## 18 96 **Methods**

### 21 97 **Study design and subjects**

23  
24 98 We conducted a large retrospective study in China. Medical examinations were performed in 2010  
25  
26 99 and 2018 at the Guangdong Second Provincial General Hospital in Guangzhou City, China  
27  
28 100 (**Figure 1**). Individuals were excluded from the study due to having (1) less than two medical  
29  
30 101 checkups; (2) absence of blood biochemical examination; and (3) no documented information on  
31  
32 102 BMI. Thus, a total of 15,959 participants were included in the study analysis (**Figure 2**).

33  
34 103

### 37 104 **Measurements**

39  
40 105 All participants were invited to join an in-person evaluation that included physical examination  
41  
42 106 and laboratory testing. Physical examinations were conducted following a standardized protocol,  
43  
44 107 including weight, height, waist circumference, hip circumference, and blood pressure. Waist  
45  
46 108 circumference was measured around the midway between the lowest border of the ribs and iliac  
47  
48 109 crest in the horizontal plane. The quality of anthropometric data was confirmed by repeated  
49  
50 110 measurements in the presence of researchers. Laboratory measurements were obtained to measure  
51  
52 111 SUA, systolic blood pressure (SBP), diastolic blood pressure (DBP), total cholesterol (TC),  
53  
54 112 triglycerides (TG), fasting plasma glucose (FPG), high-density lipoprotein cholesterol (HDL-C),  
55  
56 113 low-density lipoprotein cholesterol (LDL-C), creatinine (Cr) and blood urea nitrogen (BUN).

57  
58 114

## 115 **Outcomes and definitions**

116 Hyperuricemia was defined as having SUA concentrations  $>7.0$  mg/dL ( $416.4\mu\text{mol/L}$ ) in men  
117 or  $>6.0$  mg/dL ( $356.9\mu\text{mol/L}$ ) in women<sup>12, 13</sup>. SUA levels were categorized into two groups  
118 (normal and high SUA) to compare the prevalence of obesity and its association with SUA. The  
119 high SUA level group was classified as participants with hyperuricemia. BMI was defined as  
120 weight divided by height<sup>2</sup> ( $\text{kg/m}^2$ ) and categorized into two groups (non-obese [ $< 28 \text{ kg/m}^2$ ] and  
121 obese [ $\geq 28 \text{ kg/m}^2$ ]) based on the Asia-Pacific criteria set by the World Health Organization<sup>14, 15</sup>.  
122 We excluded patients taken drugs that might affect uric acid metabolism, such as losartan,  
123 furosemide, and allopurinol.

## 125 **Statistical analysis**

126 We conducted descriptive analysis to present the characteristics of baseline participants.  
127 Continuous variables were reported as mean  $\pm$  standard deviation (SD) and categorical variables  
128 as frequency and percentage, unless otherwise specified. Comparisons between two groups (obese  
129 and non-obese) were performed using Student's t-tests for continuous variables and  
130 Chi-square analyses for categorical variables. Logistic regression model (LRM) was used to  
131 evaluate the relationship between risk of obesity and risk factors for the data at baseline. We also  
132 utilized generalized estimating equations (GEE) models with unstructured correlation structures to  
133 quantify their longitudinal association between SUA and risk of obesity<sup>16</sup>, given the data on SUA  
134 and obesity were repeatedly measured over the 9-year study period. All models were adjusted for  
135 age, gender, SBP, DBP, TC, TG, HDL-c, LDL-c, FPG, BUN, and CR in each group. Results were  
136 presented as odds ratio (OR) and 95% confidence interval (CI) with per-1  $\mu\text{mol/L}$  or per-SD  
137 increase in SUA.

138  
139 We performed subgroup analyses using GEE models by: 1) gender (male vs female); and 2) age  
140 group (youth  $<65$  years vs. elderly  $\geq 65$  years). Additionally, we calculated the cut-off values of  
141 SUA for risk of obesity using the receiver operating characteristic (ROC) curves, based on criteria

1  
2  
3  
4 142 including (1) the point on the curve with minimum distance from the left-upper corner of the unit  
5  
6 143 square; and (2) the point where the Youden's index is maximum<sup>17</sup>. A two-sided p-value less than  
7  
8 144 0.05 was considered as the statistically significant. Analyses were performed using R version 3.5.3  
9  
10 145 (R Foundation for Statistical Computing, Vienna, Austria).

11  
12 146

### 147 **Patient and public involvement**

148 There were no patient and/or public involvement in the design of this study.

19  
20 149

### 150 **Results**

151 There were 15,959 participants (10,023 males) included in this study. The average number of  
152 health checkup for each participant was 2.62. Participants had a mean age of 37.38 years (SD:  
153 13.27) and a mean SUA of 367.05 $\mu$ mol/L (SD: 97.97) at baseline, respectively. There were 1,227  
154 (7.6%) participants that were obese at baseline. Significant differences between the obese and  
155 non-obese groups were observed for SUA, age, gender, SBP, DBP, TC, TG, HDL-c, LDL-c, FPG,  
156 BUN, and CR (p-value < 0.001) (**Table 1**). In total, the prevalence of obesity was approximately  
157 14.2% for high SUA level. Obesity prevalence significantly increased with elevating SUA in the  
158 subgroup analysis by gender and age group (p-value < 0.001). The prevalence was higher in males  
159 than females. However, the prevalence had no obvious trend for by age groups (**Table 2**). The  
160 prevalence of obesity significantly increased with the number of medical checkup years in the  
161 group with high SUA and normal SUA levels (p<0.001 for trend) (**Figure 1**). Finally, 1078  
162 participants developed obesity over the 9-year period.

163

164 As presented in **Table 3**, we observed at baseline significant differences on risk of obesity for  
165 SUA [per-1OR=1.01 (95% CI: 1.01,1.02)] or [per-SD OR=1.84 (95% CI: 1.77,1.90)], age  
166 [OR=1.02 (95% CI:1.02,1.03)], and male gender [OR=1.27 (95% CI:1.16,1.39)] in the logistic  
167 regression analysis (Model 1). When converted to categorical analysis, the risks of obesity were

1  
2  
3  
4 168 greater among those with high level of SUA, males and younger participants. Likewise, with  
5  
6 169 longitudinal data on the repeated medical checkups in the multivariable GEE model (Model 2),  
7  
8 170 consistent risk factors for obesity were obtained. The estimates were observed as follows: [per-1  
9  
10 171 OR= 1.01 (95% CI: 1.01,1.02)] or [per-SD OR=1.85 (95% CI: 1.77,1.91)] for SUA, OR=1.45  
11  
12 172 (95% CI: 1.32,1.60) for male, and OR =1.01 (1.01, 1.02) for age. In additional analysis by  
13  
14 173 categorical variables, we observed similar results with higher risk in male and elderly participants.

15  
16 174

17  
18 175 As showed in **Table 4**, similar results for GEE model analyses were observed in subgroup  
19  
20 176 analyses. Significant associations between SUA and risk of obesity were observed, where female  
21  
22 177 [per-SD OR=2.35 (2.16,2.55)] and young participants [per-SD OR=1.87 (1.80,1.94)] had an  
23  
24 178 elevated risk. We also did the analysis of baseline uric acid values vs obesity at the 9-year mark in  
25  
26 179 males and females, respectively where one eliminates baseline cases with hypertension, diabetes  
27  
28 180 or elevated BS, dyslipidemia, normal kidney function, baseline obesity. This result was consistent  
29  
30 181 with the subgroup analysis and well validate the data.

31  
32  
33 182

34  
35 183 To calculate the discrimination ability of SUA among obese participants at different times of  
36  
37 184 medical checkup (1 to 8) or different years of medical checkup (2010 to 2018), ROC curves were  
38  
39 185 calculated. **SFigure 1** and **SFigure 2** summarizes the cut-off values and the area under receiver  
40  
41 186 operating curves (AUCs) of SUA in obesity participants stratified by gender. We found that the  
42  
43 187 overall cut-off values of SUA were 429.5 $\mu$ mol/L (range: 411.5-488.5  $\mu$ mol/L) in males  
44  
45 188 and 326.9 $\mu$ mol/L (range: 298.5-426.5  $\mu$ mol/L) in females when stratified by different times of  
46  
47 189 medical checkups. Similarly, we calculated the overall cut-off values for SUA, which were 429.5  
48  
49 190  $\mu$ mol/L (range: 366.7-431.5  $\mu$ mol/L) in males and 326.9  $\mu$ mol/L (range: 301.5-362.1  $\mu$ mol/L) in  
50  
51 191 females when stratified by different years of medical checkups.

52  
53  
54 192

55  
56 193 **Discussion**

1  
2  
3  
4  
5  
6  
7  
8  
9  
10  
11  
12  
13  
14  
15  
16  
17  
18  
19  
20  
21  
22  
23  
24  
25  
26  
27  
28  
29  
30  
31  
32  
33  
34  
35  
36  
37  
38  
39  
40  
41  
42  
43  
44  
45  
46  
47  
48  
49  
50  
51  
52  
53  
54  
55  
56  
57  
58  
59  
60

194 To the best of our knowledge, this is the first longitudinal study that estimated the relationship  
195 between SUA and obesity over a long time period in China. The prevalence of obesity was  
196 approximately 14.2% for high SUA level. Previous studies found that the prevalence of  
197 hyperuricemia ranged from 2.5 to 25 % depending on the study population country <sup>18</sup>. For instance,  
198 the prevalence rates were reported to be 5 % in the Caucasus and 24.4 % in Thailand<sup>19, 20</sup>. Overall,  
199 we found high SUA level was associated with increased risk of obesity, within OR value of 1.85  
200 (1.77, 1.91) in the GEE model for all participants, which was nearly consistent with prior studies <sup>21</sup>,  
201 <sup>22</sup>. Currently, obesity and hyperuricemia, as well as their associated health complications (e.g.  
202 metabolic syndrome) have emerged as a major public health concern as a result of the growing  
203 prevalence, and the estimated economic burden<sup>7</sup>.

204

205 Several recent studies have investigated the mechanism of SUA on increasing the risk of obesity,  
206 suggesting the influence of overproduction and poor renal excretion<sup>23</sup>. Prior studies reported that  
207 increased SUA level is closely related to excessive production of UA and the reduction of urinary  
208 uric acid excretion and clearance <sup>24</sup>. This ultimately leads to increased risk of patients with  
209 visceral fatty obesity<sup>23</sup>. Visceral fat accumulation (VFA) results in a large influx of plasma free  
210 fatty acids into the portal vein and liver. This stimulates the synthesis of triglycerides and  
211 subsequently produced large amounts of UA through the activated UA synthesis pathway<sup>25, 26</sup>.  
212 Additionally, many researchers have reported a significant correlation between VFA and BMI<sup>27</sup>,  
213 <sup>28</sup>. Therefore, because of the close biological relationship between UA and BMI, it is of great  
214 importance for preventive medicine to pay attention to the interaction between UA and BMI.

215

216 Conflicting results regarding gender and age differences for the association between SUA and  
217 obesity have been reported<sup>10, 29</sup>. Our study found significant differences in obesity participants with  
218 elevated OR value among high SUA level, male, and elderly for all medical checkup participants.  
219 A similar study reported a positive relationship between BMI and SUA levels among healthy  
220 individuals in China<sup>30</sup>. Nevertheless, in this study the subgroup analyses showed that significant



1  
2  
3  
4 221 associated risk between SUA and obesity were observed higher in female and young participants.  
5  
6 222 This is consistent with a Thailand study that reported high SUA concentrations were associated  
7  
8 223 with greater risk of obesity in females<sup>31</sup>. However, study in Bangladesh and Japan reported that  
9  
10 224 elevated SUA predicted obesity higher in males and the elderly<sup>8, 29, 31</sup>. Perhaps the associations of  
11  
12 225 SUA with obesity varies by populations. Moreover, in a 10-year follow-up study, BMI was  
13  
14 226 observed to significantly increase with higher SUA levels regardless of race and gender <sup>32</sup>.  
15  
16 227 Therefore, greater attention should be provided to those vulnerable populations in clinical  
17  
18 228 guidelines.

19  
20 229

21  
22 230 An important observation was that association between SUA and risk of obesity in the LRM  
23  
24 231 [OR=1.84 (1.77,1.90)] for data at baseline was nearly consistent with the analyses in the GEE  
25  
26 232 model [OR= (1.85 (1.77,1.91)] for 9-year all participants. The risk of obesity within  
27  
28 233 hyperuricemia remained stable over the years. Therefore, short-term medical checkup results can  
29  
30 234 reflect the development of chronic diseases<sup>33</sup>. Regarding the assessment of cut-off values from  
31  
32 235 ROC of SUA in obesity participants, the cut-off values of SUA were 429.5 $\mu$ mol/L in  
33  
34 236 males and 326.9 $\mu$ mol/L in females in stratified analysis by times or years of medical checkup. The  
35  
36 237 cut-off value was approximately consistent with the international standard for males<sup>34</sup>. However, it  
37  
38 238 was underestimated for women in the group of obese participants. Perhaps the proportion of  
39  
40 239 females were fewer in this study. The cut-off values for SUA in the study may be useful for  
41  
42 240 distinguishing tests among obesity and non-obesity participants, which were significant for certain  
43  
44 241 risk value prediction and guidance<sup>35</sup>.

45  
46 242

47  
48  
49 243 To our knowledge, we must note several limitations in the present study. First, the underlying  
50  
51 244 mechanism by which SUA is increased in obese individuals remains not well understood. Second,  
52  
53 245 this study did not collect information on whether participants were prescribed medication to treat  
54  
55 246 hyperuricemia. Additionally, some medications used to treat hypertension may increase uric acid  
56  
57 247 levels. Third, there are numerous confounding factors that have not been considered, which can be

1  
2  
3  
4 248 studied together with questionnaires in the future. Moreover, the younger screening population in  
5  
6 249 this study may underestimate the increased risk of uric acid among the elderly obese.  
7

8  
9 250

10  
11 251 The present study has several strengths that must be noted. First, to our knowledge this is the first  
12  
13 252 large long-term medical checkup study to explore the relationship between SUA and obesity in  
14  
15 253 China. Second, the study analysis was based on the GEE model with high quality data by  
16  
17 254 controlling for confounding factors, which can increase the accuracy of the prediction. Third,  
18  
19 255 participants were representative of the general population with regard to clinical checkup and  
20  
21 256 obesity status, enhancing the generalizability of our findings. Moreover, results from this study  
22  
23 257 could inform prevention methods for obesity, especially in medically underserved areas where  
24  
25 258 medical service is insufficient.  
26

27  
28 259

29  
30 260 This study filled current gaps in literature by analyzing the relationship between SUA and obesity  
31  
32 261 using medical checkup data. We observed that medical checkup data can be used to improve the  
33  
34 262 risk of obesity prediction accuracy. The medical checkup data used in this study can help provide  
35  
36 263 information that will facilitate intervention development and adoption at the individual level <sup>36</sup>.  
37  
38 264 The utility of medical checkup data can potentially reach beyond predictive power alone in the  
39  
40 265 near future.  
41

42  
43 266

## 44 45 267 **Conclusions**

46  
47 268 In conclusion, our study observed significant associations between SUA and obesity in this 9-year  
48  
49 269 longitudinal study. We mainly found higher SUA level was associated with increased risk of  
50  
51 270 obesity. The prevalence of obesity was approximately 14.2% and significantly increased with the  
52  
53 271 number of medical checkup years in the group with high level of SUA. Additionally, the increased  
54  
55 272 risk of obesity was greater for high SUA level, male, and elderly participants. Subgroup analyses  
56  
57 273 revealed significant associations between SUA and obesity with higher risk for females and young  
58  
59  
60

1  
2  
3  
4 274 participants. Additionally, the cut-off for SUA on risk of obesity were approximately consistent  
5  
6 275 with the international standard. More evidence from well-designed studies are needed to confirm  
7  
8 276 our findings.  
9  
10  
11  
12  
13  
14  
15  
16  
17  
18  
19  
20  
21  
22  
23  
24  
25  
26  
27  
28  
29  
30  
31  
32  
33  
34  
35  
36  
37  
38  
39  
40  
41  
42  
43  
44  
45  
46  
47  
48  
49  
50  
51  
52  
53  
54  
55  
56  
57  
58  
59  
60

For peer review only

**Author Contributions:**

Guowei Li, Jie Zeng, Guanming Li: conceived and designed the study.

Guowei Li, Jie Zeng, Wayne R. Lawrence, Jun Yang: acquired data, performed statistical analyses and interpretation, and drafted the manuscript.

Junzhang Tian, Cheng Li, Wanmin Lian, Jingjun He, Hongying Qu, Xiaojie Wang, Hongmei Liu: provided professional and statistical support, and made several critical revisions to the manuscript.

All authors read and approved the final manuscript.

**Acknowledgments:**

None declared.

**Conflicts of Interest:**

The authors declare that they have no conflict of interest.

**Ethics approval:**

The study was approved by Guangdong Second Provincial General Hospital Ethics Committee (reg. no. 20190717-01(2)-YXKXYJ-KT). The need for consent was waived due to the retrospective nature of this study.

**Data availability statement:**

All data relevant to the study are included in the article or uploaded as supplementary information.

**Funding:**

Research grants from the Science Foundation of Guangdong Second Provincial General Hospital (YQ2019-008).

1  
2  
3  
4  
5  
6  
7  
8  
9  
10  
11  
12  
13  
14  
15  
16  
17  
18  
19  
20  
21  
22  
23  
24  
25  
26  
27  
28  
29  
30  
31  
32  
33  
34  
35  
36  
37  
38  
39  
40  
41  
42  
43  
44  
45  
46  
47  
48  
49  
50  
51  
52  
53  
54  
55  
56  
57  
58  
59  
60

For peer review only

## Reference

1. Nagahama S, Kashino I, Hu H, Nanri A, Kurotani K, Kuwahara K *et al.* Haemoglobin A1c and hearing impairment: longitudinal analysis using a large occupational health check-up data of Japan. *BMJ open* 2018; **8**(9): e023220.
2. Kim YJ, Park H. Improving Prediction of High-Cost Health Care Users with Medical Check-Up Data. *Big data* 2019; **7**(3): 163-175.
3. Global Burden of Disease Study C. Global, regional, and national incidence, prevalence, and years lived with disability for 301 acute and chronic diseases and injuries in 188 countries, 1990-2013: a systematic analysis for the Global Burden of Disease Study 2013. *Lancet* 2015; **386**(9995): 743-800.
4. Ng M, Fleming T, Robinson M, Thomson B, Graetz N, Margono C *et al.* Global, regional, and national prevalence of overweight and obesity in children and adults during 1980-2013: a systematic analysis for the Global Burden of Disease Study 2013. *Lancet* 2014; **384**(9945): 766-81.
5. Liu R, Han C, Wu D, Xia X, Gu J, Guan H *et al.* Prevalence of Hyperuricemia and Gout in Mainland China from 2000 to 2014: A Systematic Review and Meta-Analysis. *BioMed research international* 2015; **2015**: 762820.
6. Ishizaka N, Ishizaka Y, Toda A, Tani M, Koike K, Yamakado M *et al.* Changes in waist circumference and body mass index in relation to changes in serum uric acid in Japanese individuals. *The Journal of rheumatology* 2010; **37**(2): 410-6.
7. Chen MY, Zhao CC, Li TT, Zhu Y, Yu TP, Bao YQ *et al.* Serum uric acid levels are associated with obesity but not cardio-cerebrovascular events in Chinese inpatients with type 2 diabetes. *Scientific reports* 2017; **7**: 40009.
8. Dai X, Yuan J, Yao P, Yang B, Gui L, Zhang X *et al.* Association between serum uric acid and the metabolic syndrome among a middle- and old-age Chinese population. *European journal of epidemiology* 2013; **28**(8): 669-76.
9. Johnson RJ, Lanaspas MA, Gaucher EA. Uric acid: a danger signal from the RNA world that may have a role in the epidemic of obesity, metabolic syndrome, and cardiorenal disease: evolutionary considerations. *Seminars in nephrology* 2011; **31**(5): 394-9.
10. Ali N, Perveen R, Rahman S, Mahmood S, Rahman S, Islam S. Prevalence of hyperuricemia and the relationship between serum uric acid and obesity: A study on Bangladeshi adults. 2018; **13**(11): e0206850.
11. Yang C, Yang S, Feng C, Zhang C, Xu W, Zhang L *et al.* Associations of hyperuricemia and obesity with remission of nonalcoholic fatty liver disease among Chinese men: A retrospective cohort study. *PloS one* 2018; **13**(2): e0192396.
12. Sui X, Church TS, Meriwether RA, Lobelo F, Blair SN. Uric acid and the development of metabolic

- 1  
2  
3 syndrome in women and men. *Metabolism: clinical and experimental* 2008; **57**(6): 845-52.  
4  
5  
6 13. You L, Liu A, Wuyun G, Wu H, Wang P. Prevalence of hyperuricemia and the relationship  
7 between serum uric acid and metabolic syndrome in the Asian Mongolian area. *Journal of*  
8 *atherosclerosis and thrombosis* 2014; **21**(4): 355-65.  
9  
10 14. WHO. Appropriate body-mass index for Asian populations and its implications for policy and  
11 intervention strategies. *Lancet* 2004; **363**(9403): 157-63.  
12  
13 15. Li MF, Ren Y, Zhao CC, Zhang R, Li LX, Liu F *et al.* Prevalence and clinical characteristics of  
14 lower limb atherosclerotic lesions in newly diagnosed patients with ketosis-onset diabetes: a  
15 cross-sectional study. *Diabetology & metabolic syndrome* 2014; **6**: 71.  
16  
17 16. Buzkova P, Brown ER, John-Stewart GC. Longitudinal data analysis for generalized linear  
18 models under participant-driven informative follow-up: an application in maternal health  
19 epidemiology. *American journal of epidemiology* 2010; **171**(2): 189-97.  
20  
21 17. Habibzadeh F, Habibzadeh P, Yadollahie M. On determining the most appropriate test cut-off  
22 value: the case of tests with continuous results. *Biochemia medica* 2016; **26**(3): 297-307.  
23  
24 18. Remedios C, Shah M, Bhasker AG, Lakdawala M. Hyperuricemia: a reality in the Indian obese.  
25 *Obesity surgery* 2012; **22**(6): 945-8.  
26  
27 19. Uaratanawong S, Suraamornkul S, Angkeaw S, Uaratanawong R. Prevalence of hyperuricemia  
28 in Bangkok population. *Clinical rheumatology* 2011; **30**(7): 887-93.  
29  
30 20. Ford DK, Demos AM. Serum Uric Acid Levels of Healthy Caucasian, Chinese and Haida Indian  
31 Males in British Columbia. *Canadian Medical Association journal* 1964; **90**: 1295-7.  
32  
33 21. Kuwabara M, Kuwabara R, Hisatome I, Niwa K, Roncal-Jimenez CA, Bjornstad P *et*  
34 *al.* "Metabolically Healthy" Obesity and Hyperuricemia Increase Risk for Hypertension and  
35 Diabetes: 5-year Japanese Cohort Study. *Obesity* 2017; **25**(11): 1997-2008.  
36  
37 22. Zhang N, Chang Y, Guo X, Chen Y, Ye N, Sun Y. A Body Shape Index and Body Roundness  
38 Index: Two new body indices for detecting association between obesity and hyperuricemia in  
39 rural area of China. *European journal of internal medicine* 2016; **29**: 32-6.  
40  
41 23. Matsuura F, Yamashita S, Nakamura T, Nishida M, Nozaki S, Funahashi T *et al.* Effect of  
42 visceral fat accumulation on uric acid metabolism in male obese subjects: visceral fat obesity  
43 is linked more closely to overproduction of uric acid than subcutaneous fat obesity.  
44 *Metabolism: clinical and experimental* 1998; **47**(8): 929-33.  
45  
46 24. Han T, Meng X, Shan R, Zi T, Li Y, Ma H *et al.* Temporal relationship between hyperuricemia  
47 and obesity, and its association with future risk of type 2 diabetes. *International journal of*  
48 *obesity (2005)* 2018; **42**(7): 1336-1344.  
49  
50 25. Fabregat I, Revilla E, Machado A. Short-term control of the pentose phosphate cycle by  
51 insulin could be modulated by the NADPH/NADP ratio in rat adipocytes and hepatocytes.  
52 *Biochemical and biophysical research communications* 1987; **146**(2): 920-5.  
53  
54  
55  
56  
57  
58  
59  
60

- 1  
2  
3 26. Fox IH. Metabolic basis for disorders of purine nucleotide degradation. *Metabolism: clinical and experimental* 1981; **30**(6): 616-34.
- 4  
5  
6 27. Examination Committee of Criteria for 'Obesity Disease' in J, Japan Society for the Study of O. New criteria for 'obesity disease' in Japan. *Circulation journal : official journal of the Japanese Circulation Society* 2002; **66**(11): 987-92.
- 7  
8  
9  
10  
11 28. Oka R, Miura K, Sakurai M, Nakamura K, Yagi K, Miyamoto S *et al.* Comparison of waist circumference with body mass index for predicting abdominal adipose tissue. *Diabetes research and clinical practice* 2009; **83**(1): 100-5.
- 12  
13  
14  
15  
16 29. Tanaka K, Ogata S, Tanaka H, Omura K, Honda C, Hayakawa K. The relationship between body mass index and uric acid: a study on Japanese adult twins. *Environmental health and preventive medicine* 2015; **20**(5): 347-53.
- 17  
18  
19  
20 30. Wang H, Wang L, Xie R, Dai W, Gao C, Shen P *et al.* Association of Serum Uric Acid with Body Mass Index: A Cross-Sectional Study from Jiangsu Province, China. *Iranian journal of public health* 2014; **43**(11): 1503-9.
- 21  
22  
23  
24  
25 31. Jaipakdee J, Jiamjarasrangsri W, Lohsoonthorn V, Lertmaharit S. Prevalence of metabolic syndrome and its association with serum uric acid levels in Bangkok Thailand. *The Southeast Asian journal of tropical medicine and public health* 2013; **44**(3): 512-22.
- 26  
27  
28  
29  
30 32. Rathmann W, Haastert B, Icks A, Giani G, Roseman JM. Ten-year change in serum uric acid and its relation to changes in other metabolic risk factors in young black and white adults: the CARDIA study. *European journal of epidemiology* 2007; **22**(7): 439-45.
- 31  
32  
33  
34 33. Nohara Y, Kai E. Health checkup and telemedical intervention program for preventive medicine in developing countries: verification study. 2015; **17**(1): e2.
- 35  
36  
37 34. Bardin T, Richette P. Definition of hyperuricemia and gouty conditions. *Current opinion in rheumatology* 2014; **26**(2): 186-91.
- 38  
39  
40  
41 35. Mongioi LM, Condorelli RA, Barbagallo F, Cannarella R, La Vignera S, Calogero AE. Accuracy of the Low-Dose ACTH Stimulation Test for Adrenal Insufficiency Diagnosis: A Re-Assessment of the Cut-Off Value. *Journal of clinical medicine* 2019; **8**(6).
- 42  
43  
44  
45 36. Taninaga J, Nishiyama Y. Prediction of future gastric cancer risk using a machine learning algorithm and comprehensive medical check-up data: A case-control study. 2019; **9**(1): 12384.
- 46  
47  
48  
49  
50  
51  
52  
53  
54  
55  
56  
57  
58  
59  
60



1  
2  
3  
4 **Tables and Figure legends:**

5 **Table 1.** Baseline characteristics and comparison between obesity and non-obesity  
6 participants.  
7  
8

9  
10  
11 **Table 2.** The prevalence of obesity by gender, age of checkup stratified by baseline SUA.  
12

13  
14  
15 **Table3.** Relationship between risk factors and risk of obesity in the models.  
16

17  
18 **Table 4.** Relationship between risk factors and risk of obesity in the models stratified by gender  
19 and age group.  
20

21  
22  
23  
24 **Figure 1.** Location of Guangdong Second Provincial General Hospital (Guangzhou,  
25 Guangdong, China) and the prevalence of obesity by different years stratified by baseline  
26 SUA.  
27  
28

29  
30  
31 **Figure 2.** Flow diagram showing selection process of participants in our study.  
32

33  
34  
35  
36  
37  
38 **Supplemental data:**

39  
40  
41 **Supplementary Figure1.** The ROC curves showing the relationship between SUA and risk of  
42 obesity stratified by gender and different times of medical checkups.  
43

44  
45  
46 **Supplementary Figure2.** The ROC curves showing the relationship between SUA and risk of  
47 obesity stratified by gender and different years of medical checkups (from 2010 to 2018).  
48  
49

**Table 1.** Baseline characteristics and comparison between obesity and non-obesity participants.

| Characteristics     | All patients   | Obesity <sup>a</sup> | Non-obesity    | <i>p</i> -value <sup>b</sup> |
|---------------------|----------------|----------------------|----------------|------------------------------|
|                     | n=15959        | n=1227               | n=14732        |                              |
| SUA (μmol/L) [SD]   | 367.05 (97.97) | 434.95 (97.65)       | 361.32 (95.82) | <0.001                       |
| Age (years) [SD]    | 37.38 (13.27)  | 40.40 (13.40)        | 37.13 (13.23)  | <0.001                       |
| Male [n, (%)]       | 10023 (62.8)   | 1012 (82.5)          | 9011 (61.2)    | <0.001                       |
| SBP (mmHg) [SD]     | 121.09 (15.85) | 131.78 (16.47)       | 120.19 (15.47) | <0.001                       |
| DBP (mmHg) [SD]     | 73.84 (10.31)  | 81.16 (11.41)        | 73.23 (9.97)   | <0.001                       |
| TC (mmol/L) [SD]    | 4.88 (0.93)    | 5.19 (0.95)          | 4.86 (0.93)    | <0.001                       |
| TG (mmol/L) [SD]    | 1.46 (1.10)    | 2.18 (1.49)          | 1.40 (1.04)    | <0.001                       |
| HDL-c (mmol/L) [SD] | 1.26 (0.25)    | 1.15 (0.22)          | 1.27 (0.25)    | <0.001                       |
| LDL-c (mmol/L) [SD] | 2.92 (0.78)    | 3.20 (0.80)          | 2.90 (0.77)    | <0.001                       |
| FPG (mmol/L) [SD]   | 5.06 (1.04)    | 5.51 (1.61)          | 5.03 (0.97)    | <0.001                       |
| BUN (mmol/L) [SD]   | 4.78 (1.25)    | 5.07 (1.30)          | 4.75 (1.24)    | <0.001                       |
| CR (mmol/L) [SD]    | 94.57 (17.12)  | 100.05 (16.17)       | 94.11 (17.12)  | <0.001                       |

**Note:** Continuous variables are presented as the means (standard derivation); SUA, serum uric acid; SBP, systolic blood pressure; DBP, diastolic blood pressure; TC, total cholesterol; TG, triglycerides; HDL-c, high-density lipoprotein cholesterol; LDL-c, low-density lipoprotein cholesterol; FPG, fasting plasma glucose; BUN, blood urea nitrogen; Cr, creatinine.

<sup>a</sup>Obesity was defined as body mass index (BMI)  $\geq 28.0$  kg/m<sup>2</sup>.

<sup>b</sup>*p* value for the difference of variables between the two data sets based on independent sample t-test or chi-square test.

\*The average number of health checkup for each participant is 2.62.

**Table 2.** The prevalence of obesity by gender, age of checkup stratified by baseline SUA.

| Variable         | Obesity prevalence, n (%) <sup>a</sup> |                 |         |
|------------------|----------------------------------------|-----------------|---------|
|                  | Normal SUA                             | High SUA        | P-value |
| <b>Gender</b>    |                                        |                 |         |
| Male             | 357/5280 (6.8)                         | 570/3768 (15.1) | <0.001  |
| Female           | 104/4431 (2.3)                         | 97/937 (10.3)   | <0.001  |
| <b>Age group</b> |                                        |                 |         |
| <30              | 88/3509 (2.5)                          | 168/1643 (10.2) | <0.001  |
| 30-44            | 182/3736 (4.9)                         | 309/1692 (18.3) | <0.001  |
| 45-59            | 121/1727 (7.0)                         | 125/865 (14.5)  | <0.001  |
| 60-74            | 54/606 (8.9)                           | 53/378 (14.0)   | <0.001  |
| ≥75              | 11/134 (8.2)                           | 12/127 (9.4)    | <0.001  |
| <b>Overall</b>   | 456/9711 (4.6)                         | 669/4705 (14.2) | <0.001  |

level was defined as the SUA greater than 420 mmol/L in men and greater than 360 mmol/L in women, while the others are normal.

<sup>a</sup>Obesity prevalence = (n of obesity) / (total participants).

**Table 3.** Relationship between risk factors and risk of obesity in the models.

| Variable                    | Model 1 <sup>c</sup>                      |                | Model 2 <sup>d</sup>                      |                |
|-----------------------------|-------------------------------------------|----------------|-------------------------------------------|----------------|
|                             | <i>OR<sup>a</sup> (95%CI<sup>b</sup>)</i> | <i>p-value</i> | <i>OR<sup>a</sup> (95%CI<sup>b</sup>)</i> | <i>p-value</i> |
| <b>Continuous analysis</b>  |                                           |                |                                           |                |
| <b>SUA (μmol/L)</b>         |                                           |                |                                           |                |
| Per-1                       | 1.01 (1.01,1.02)                          | <0.001         | 1.01 (1.01,1.02)                          | <0.001         |
| Per-SD                      | 1.84 (1.77,1.90)                          | <0.001         | 1.85 (1.77,1.91)                          | <0.001         |
| <b>Gender [n, (%)]</b>      |                                           |                |                                           |                |
| Female                      | Reference                                 |                | Reference                                 |                |
| Male                        | 1.27 (1.16,1.39)                          | <0.001         | 1.45 (1.32,1.60)                          | <0.001         |
| Age (years)                 | 1.02 (1.02, 1.03)                         | <0.001         | 1.01 (1.01, 1.02)                         | <0.001         |
| <b>Categorical analysis</b> |                                           |                |                                           |                |
| <b>SUA<sup>e</sup></b>      |                                           |                |                                           |                |
| Normal SUA                  | Reference                                 |                | Reference                                 |                |
| High SUA                    | 2.02 (1.84, 2.23)                         | <0.001         | 2.57 (2.31, 2.87)                         | <0.001         |
| <b>Gender</b>               |                                           |                |                                           |                |
| Female                      | Reference                                 |                | Reference                                 |                |
| Male                        | 1.25 (1.09, 1.43)                         | 0.002          | 1.69 (1.59, 1.79)                         | <0.001         |
| <b>Age group</b>            |                                           |                |                                           |                |
| <30                         | Reference                                 |                | Reference                                 |                |
| 30-44                       | 1.38 (1.14, 1.66)                         | 0.001          | 1.73 (1.54, 1.91)                         | <0.001         |
| 45-59                       | 1.07 (0.89, 1.30)                         | 0.475          | 1.94 (1.72, 2.18)                         | <0.001         |
| 60-74                       | 1.12 (0.90, 1.38)                         | 0.314          | 1.99 (1.72, 2.32)                         | <0.001         |
| ≥75                         | 0.95 (0.71, 1.27)                         | 0.718          | 1.86(1.50, 2.31)                          | <0.001         |

**Note:** <sup>a</sup>OR: odds ratio; <sup>b</sup>CI: confidence interval.

<sup>c</sup>Model 1 was adjusted for the variables of SBP, DBP, TC, TG, HDL-c, LDL-c, FPG, BUN, CR based on the first time of medical checkup participants by using multivariate logistic regression model (LRM).

<sup>d</sup>Model 2 was adjusted for the variables of repeated times or years of medical checkup, SBP, DBP, TC, TG, HDL-c, LDL-c, FPG, BUN, CR based on all medical checkup participants by using generalized estimation equation model (GEE).

<sup>e</sup>High SUA level was defined as the SUA greater than 420 mmol/L in men and greater than 360 mmol/L in women, while the others are normal.

**Table 4.** Relationship between risk factors and risk of obesity in the models stratified by gender and age group.

| Variable                     | Generalized estimation equation model (GEE) <sup>c</sup> |                |                                           |                |
|------------------------------|----------------------------------------------------------|----------------|-------------------------------------------|----------------|
|                              | Male                                                     |                | Female                                    |                |
| Gender                       | <i>OR<sup>a</sup> (95%CI<sup>b</sup>)</i>                | <i>p-value</i> | <i>OR<sup>a</sup> (95%CI<sup>b</sup>)</i> | <i>p-value</i> |
| <b>Continuous variable</b>   |                                                          |                |                                           |                |
| <b>SUA (μmol/L)</b>          |                                                          |                |                                           |                |
| Per-1                        | 1.01 (1.01,1.02)                                         | <0.001         | 1.01 (1.01,1.02)                          | <0.001         |
| Per-SD                       | 1.70 (1.64,1.77)                                         | <0.001         | 2.35 (2.16,2.55)                          | <0.001         |
| <b>Categorical variables</b> |                                                          |                |                                           |                |
| <b>SUA</b>                   |                                                          |                |                                           |                |
| Normal SUA                   | Reference                                                |                | Reference                                 |                |
| High SUA                     | 2.40 (2.23,2.59)                                         | <0.001         | 3.79 (3.23,4.45)                          | <0.001         |
| Age group                    | Youth (<65 year)                                         |                | Elderly (≥65 year)                        |                |
|                              | <i>OR<sup>a</sup> (95%CI<sup>b</sup>)</i>                | <i>p-value</i> | <i>OR<sup>a</sup> (95%CI<sup>b</sup>)</i> | <i>p-value</i> |
| <b>Continuous variable</b>   |                                                          |                |                                           |                |
| <b>SUA (μmol/L)</b>          |                                                          |                |                                           |                |
| Per-1                        | 1.01 (1.01,1.02)                                         | <0.001         | 1.00 (1.00,1.01)                          | <0.001         |
| Per-SD                       | 1.87 (1.80,1.94)                                         | <0.001         | 1.48 (1.34,1.62)                          | <0.001         |
| <b>Categorical variables</b> |                                                          |                |                                           |                |
| <b>SUA</b>                   |                                                          |                |                                           |                |
| Normal SUA                   | Reference                                                |                | Reference                                 |                |
| High SUA                     | 2.78 (2.58,2.99)                                         | <0.001         | 1.99 (1.63,2.43)                          | <0.001         |

**Note:** <sup>a</sup>OR: odds ratio; <sup>b</sup>CI: confidence interval.

<sup>c</sup>Model was adjusted for the variables of repeated times or years of medical checkup, age, sex, SBP, DBP, TC, TG, HDL-c, LDL-c, FPG, BUN, CR based on all medical checkup participants by using generalized estimation equation model (GEE).

<sup>e</sup>High SUA level was defined as the SUA greater than 420 mmol/L in men and greater than 360 mmol/L in women, while the others are normal.

1  
2  
3  
4  
5  
6  
7  
8  
9  
10  
11  
12  
13  
14  
15  
16  
17  
18  
19  
20  
21  
22  
23  
24  
25  
26  
27  
28  
29  
30  
31  
32  
33  
34  
35  
36  
37  
38  
39  
40  
41  
42  
43  
44  
45  
46  
47  
48  
49  
50  
51  
52  
53  
54  
55  
56  
57  
58  
59  
60

For peer review only

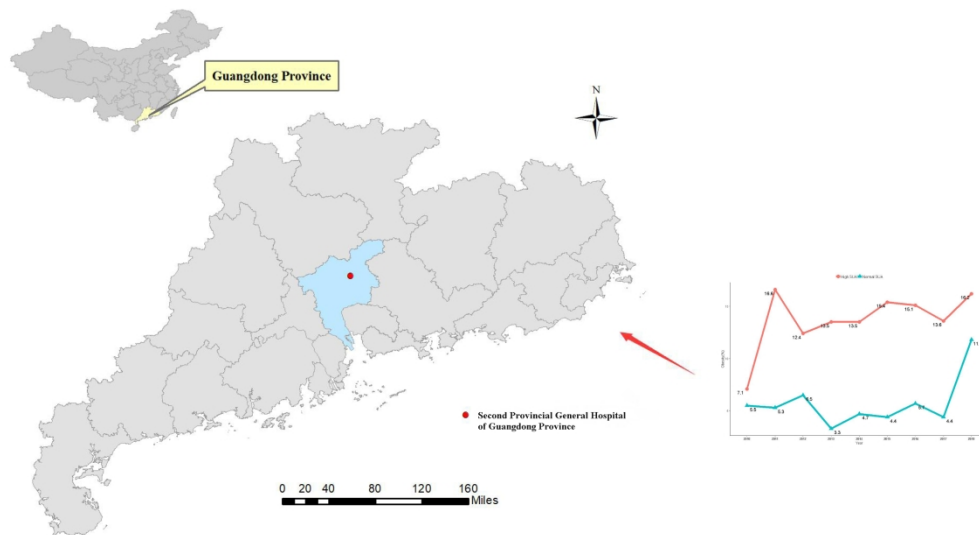

240x140mm (300 x 300 DPI)

1  
2  
3  
4  
5  
6  
7  
8  
9  
10  
11  
12  
13  
14  
15  
16  
17  
18  
19  
20  
21  
22  
23  
24  
25  
26  
27  
28  
29  
30  
31  
32  
33  
34  
35  
36  
37  
38  
39  
40  
41  
42  
43  
44  
45  
46  
47  
48  
49  
50  
51  
52  
53  
54  
55  
56  
57  
58  
59  
60



155x117mm (300 x 300 DPI)





127x63mm (300 x 300 DPI)

1  
2  
3  
4  
5  
6  
7  
8  
9  
10  
11  
12  
13  
14  
15  
16  
17  
18  
19  
20  
21  
22  
23  
24  
25  
26  
27  
28  
29  
30  
31  
32  
33  
34  
35  
36  
37  
38  
39  
40  
41  
42  
43  
44  
45  
46  
47  
48  
49  
50  
51  
52  
53  
54  
55  
56  
57  
58  
59  
60

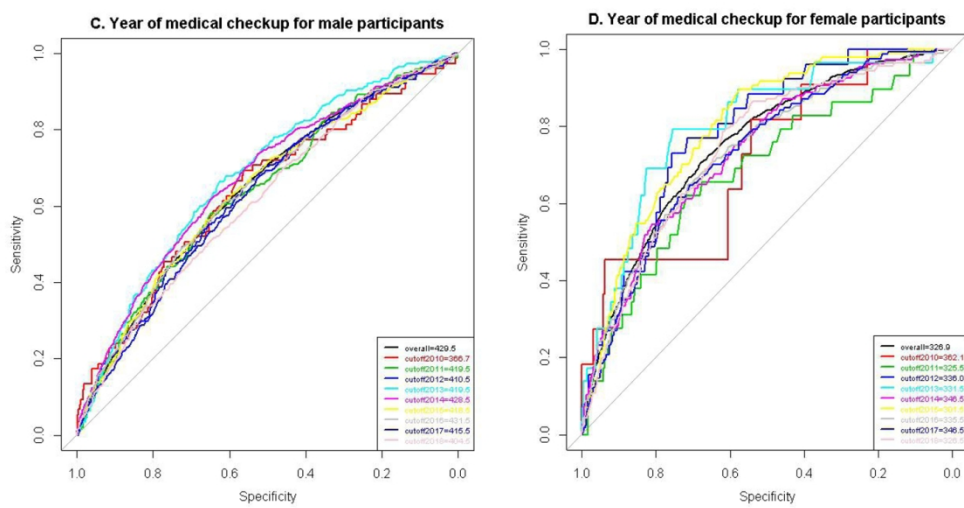

127x64mm (300 x 300 DPI)

## STROBE Statement—checklist of items that should be included in reports of observational studies

|                              | Item No | Recommendation                                                                                                                                                                                                                                                                                                                                                                                                                                                                 | Page No |
|------------------------------|---------|--------------------------------------------------------------------------------------------------------------------------------------------------------------------------------------------------------------------------------------------------------------------------------------------------------------------------------------------------------------------------------------------------------------------------------------------------------------------------------|---------|
| <b>Title and abstract</b>    | 1       | (a) Indicate the study's design with a commonly used term in the title or the abstract                                                                                                                                                                                                                                                                                                                                                                                         | 1-4     |
|                              |         | (b) Provide in the abstract an informative and balanced summary of what was done and what was found                                                                                                                                                                                                                                                                                                                                                                            | 1-4     |
| <b>Introduction</b>          |         |                                                                                                                                                                                                                                                                                                                                                                                                                                                                                |         |
| Background/rationale         | 2       | Explain the scientific background and rationale for the investigation being reported                                                                                                                                                                                                                                                                                                                                                                                           | 6       |
| Objectives                   | 3       | State specific objectives, including any prespecified hypotheses                                                                                                                                                                                                                                                                                                                                                                                                               | 7       |
| <b>Methods</b>               |         |                                                                                                                                                                                                                                                                                                                                                                                                                                                                                |         |
| Study design                 | 4       | Present key elements of study design early in the paper                                                                                                                                                                                                                                                                                                                                                                                                                        | 7       |
| Setting                      | 5       | Describe the setting, locations, and relevant dates, including periods of recruitment, exposure, follow-up, and data collection                                                                                                                                                                                                                                                                                                                                                | 7       |
| Participants                 | 6       | (a) <i>Cohort study</i> —Give the eligibility criteria, and the sources and methods of selection of participants. Describe methods of follow-up<br><br><i>Case-control study</i> —Give the eligibility criteria, and the sources and methods of case ascertainment and control selection. Give the rationale for the choice of cases and controls<br><br><i>Cross-sectional study</i> —Give the eligibility criteria, and the sources and methods of selection of participants | 7       |
|                              |         | (b) <i>Cohort study</i> —For matched studies, give matching criteria and number of exposed and unexposed<br><br><i>Case-control study</i> —For matched studies, give matching criteria and the number of controls per case                                                                                                                                                                                                                                                     | 7       |
| Variables                    | 7       | Clearly define all outcomes, exposures, predictors, potential confounders, and effect modifiers. Give diagnostic criteria, if applicable                                                                                                                                                                                                                                                                                                                                       | 7-8     |
| Data sources/<br>measurement | 8*      | For each variable of interest, give sources of data and details of methods of assessment (measurement). Describe comparability of assessment methods if there is more than one group                                                                                                                                                                                                                                                                                           | 7-8     |
| Bias                         | 9       | Describe any efforts to address potential sources of bias                                                                                                                                                                                                                                                                                                                                                                                                                      | 7-8     |
| Study size                   | 10      | Explain how the study size was arrived at                                                                                                                                                                                                                                                                                                                                                                                                                                      | 7-8     |

1  
2  
3  
4  
5  
6  
7  
8  
9  
10  
11  
12  
13  
14  
15  
16  
17  
18  
19  
20  
21  
22  
23  
24  
25  
26  
27  
28  
29  
30  
31  
32  
33  
34  
35  
36  
37  
38  
39  
40  
41  
42  
43  
44  
45  
46  
47  
48  
49  
50  
51  
52  
53  
54  
55  
56  
57  
58  
59  
60

|                        |    |                                                                                                                              |     |
|------------------------|----|------------------------------------------------------------------------------------------------------------------------------|-----|
| Quantitative variables | 11 | Explain how quantitative variables were handled in the analyses. If applicable, describe which groupings were chosen and why | 7-8 |
| Statistical methods    | 12 | (a) Describe all statistical methods, including those used to control for confounding                                        | 8   |
|                        |    | (b) Describe any methods used to examine subgroups and interactions                                                          | 8-9 |
|                        |    | (c) Explain how missing data were addressed                                                                                  | 8-9 |
|                        |    | (d) <i>Cohort study</i> —If applicable, explain how loss to follow-up was addressed                                          | 8-9 |
|                        |    | <i>Case-control study</i> —If applicable, explain how matching of cases and controls was addressed                           |     |
|                        |    | <i>Cross-sectional study</i> —If applicable, describe analytical methods taking account of sampling strategy                 |     |
|                        |    | (e) Describe any sensitivity analyses                                                                                        | 8-9 |

Continued on next page

1  
2  
3  
4  
5  
6  
7  
8  
9  
10  
11  
12  
13  
14  
15  
16  
17  
18  
19  
20  
21  
22  
23  
24  
25  
26  
27  
28  
29  
30  
31  
32  
33  
34  
35  
36  
37  
38  
39  
40  
41  
42  
43  
44  
45  
46  
47  
48  
49  
50  
51  
52  
53  
54  
55  
56  
57  
58  
59  
60**Results**

|                          |         |                                                                                                                                                                                                              |       |
|--------------------------|---------|--------------------------------------------------------------------------------------------------------------------------------------------------------------------------------------------------------------|-------|
| Participants             | 13<br>* | (a) Report numbers of individuals at each stage of study—eg numbers potentially eligible, examined for eligibility, confirmed eligible, included in the study, completing follow-up, and analysed            | 9     |
|                          |         | (b) Give reasons for non-participation at each stage                                                                                                                                                         | 9     |
|                          |         | (c) Consider use of a flow diagram                                                                                                                                                                           | 9     |
| Descriptive data         | 14<br>* | (a) Give characteristics of study participants (eg demographic, clinical, social) and information on exposures and potential confounders                                                                     | 9-10  |
|                          |         | (b) Indicate number of participants with missing data for each variable of interest                                                                                                                          | 9-10  |
|                          |         | (c) <i>Cohort study</i> —Summarise follow-up time (eg, average and total amount)                                                                                                                             | 9-10  |
| Outcome data             | 15<br>* | <i>Cohort study</i> —Report numbers of outcome events or summary measures over time                                                                                                                          | 9-10  |
|                          |         | <i>Case-control study</i> —Report numbers in each exposure category, or summary measures of exposure                                                                                                         | 9-10  |
|                          |         | <i>Cross-sectional study</i> —Report numbers of outcome events or summary measures                                                                                                                           | 9-10  |
| Main results             | 16      | (a) Give unadjusted estimates and, if applicable, confounder-adjusted estimates and their precision (eg, 95% confidence interval). Make clear which confounders were adjusted for and why they were included | 9-10  |
|                          |         | (b) Report category boundaries when continuous variables were categorized                                                                                                                                    | 9-10  |
|                          |         | (c) If relevant, consider translating estimates of relative risk into absolute risk for a meaningful time period                                                                                             | 9-10  |
| Other analyses           | 17      | Report other analyses done—eg analyses of subgroups and interactions, and sensitivity analyses                                                                                                               | 9-10  |
| <b>Discussion</b>        |         |                                                                                                                                                                                                              |       |
| Key results              | 18      | Summarise key results with reference to study objectives                                                                                                                                                     | 10    |
| Limitations              | 19      | Discuss limitations of the study, taking into account sources of potential bias or imprecision. Discuss both direction and magnitude of any potential bias                                                   | 12    |
| Interpretation           | 20      | Give a cautious overall interpretation of results considering objectives, limitations, multiplicity of analyses, results from similar studies, and other relevant evidence                                   | 13    |
| Generalisability         | 21      | Discuss the generalisability (external validity) of the study results                                                                                                                                        | 10-13 |
| <b>Other information</b> |         |                                                                                                                                                                                                              |       |
| Funding                  | 22      | Give the source of funding and the role of the funders for the present study and, if applicable, for the original study on which the present article is based                                                | 14    |

1  
2  
3  
4  
5  
6  
7  
8  
9  
10  
11  
12  
13  
14  
15  
16  
17  
18  
19  
20  
21  
22  
23  
24  
25  
26  
27  
28  
29  
30  
31  
32  
33  
34  
35  
36  
37  
38  
39  
40  
41  
42  
43  
44  
45  
46  
47  
48  
49  
50  
51  
52  
53  
54  
55  
56  
57  
58  
59  
60

\*Give information separately for cases and controls in case-control studies and, if applicable, for exposed and unexposed groups in cohort and cross-sectional studies.

**Note:** An Explanation and Elaboration article discusses each checklist item and gives methodological background and published examples of transparent reporting. The STROBE checklist is best used in conjunction with this article (freely available on the Web sites of PLoS Medicine at <http://www.plosmedicine.org/>, Annals of Internal Medicine at <http://www.annals.org/>, and Epidemiology at <http://www.epidem.com/>). Information on the STROBE Initiative is available at [www.strobe-statement.org](http://www.strobe-statement.org).

For peer review only
