# Supplementary material for: Association between serum uric acid and obesity in Chinese adults: a 9-year longitudinal data analysis
Source: PubMed Central journal article supplement — BMJ Open. 2021 Feb 5;11(2):e041919. doi: 10.1136/bmjopen-2020-041919 (PMC7908911; doi:10.1136/bmjopen-2020-041919), 2021-02-05
Supplement: bmjopen-2020-041919supp001.pdf [file bmjopen-2020-041919supp001.pdf]

**Supplemental Figure 1.** The ROC curves showing the relationship between SUA and risk of obesity stratified by gender and different times of medical checkups.

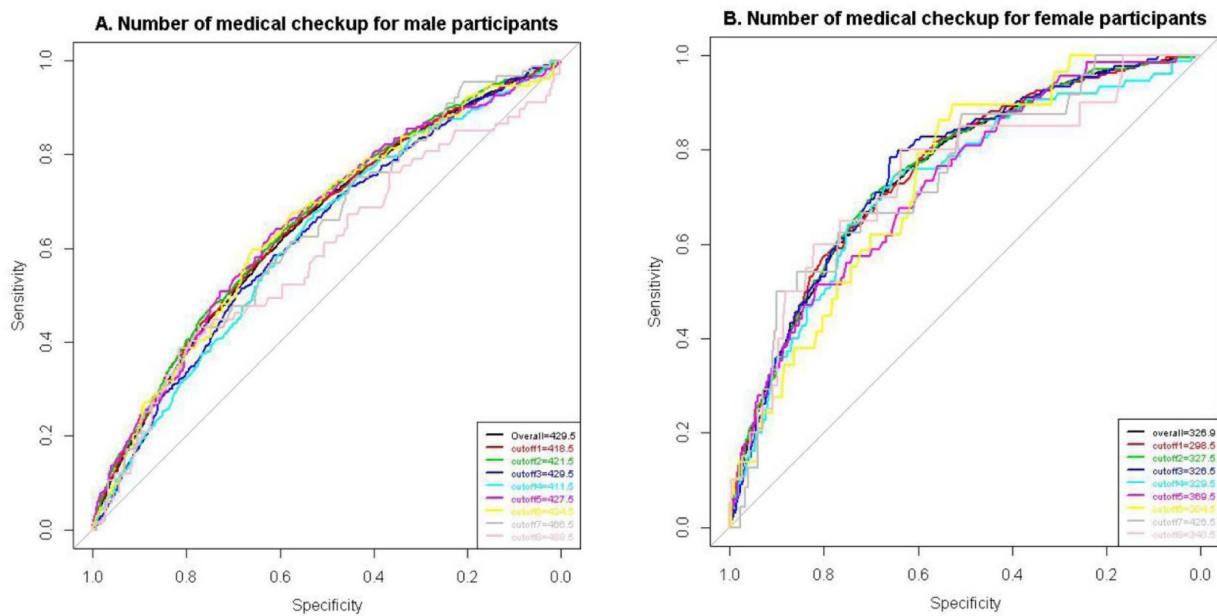

\*Figure (A) based on different times of medical checkups for male; Figure (B) based on different times of medical checkups for female; Overall indicated the cutoff point for all times of medical checkups for participants; cutoff 1 meant the cutoff point determined based on the data for the first time of medical checkup; cutoff 2 meant the cutoff point determined based on the data for the second time of medical checkup; and so forth.
