# Supplementary material for: Association between serum uric acid and obesity in Chinese adults: a 9-year longitudinal data analysis
Source: PubMed Central journal article supplement — BMJ Open. 2021 Feb 5;11(2):e041919. doi: 10.1136/bmjopen-2020-041919 (PMC7908911; doi:10.1136/bmjopen-2020-041919), 2021-02-05
Supplement: bmjopen-2020-041919supp002.pdf [file bmjopen-2020-041919supp002.pdf]

**Supplemental Figure 2.** The ROC curves showing the relationship between SUA and risk of obesity stratified by gender and different years of medical checkups (from 2010 to 2018).

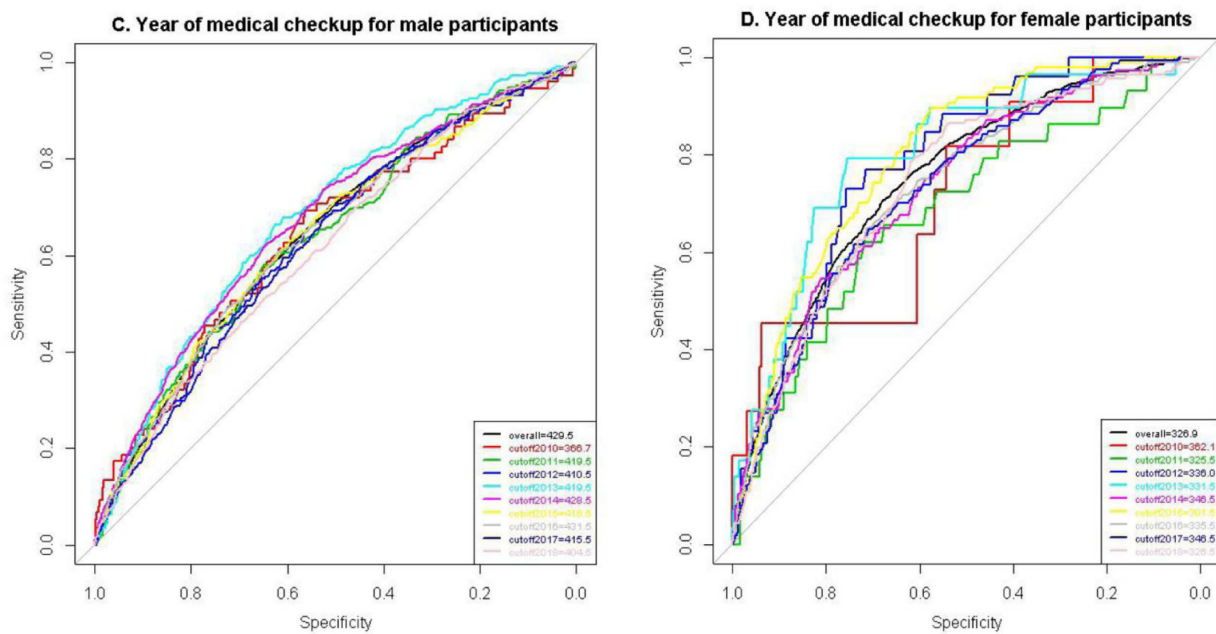

\*Figure (C) based on different years of medical checkups for male; Figure (D) based on different years of medical checkups for female; Overall indicated the cutoff point for all years of medical checkups for participants; cutoff 2010 meant the cutoff point determined based on the data for the 2020 year of medical checkup; cutoff 2011 meant the cutoff point determined based on the data for the 2011 year of medical checkup; and so forth.
